# Supplementary material for: Velvet domain protein VosA represses the zinc cluster transcription factor SclB regulatory network for Aspergillus nidulans asexual development, oxidative stress response and secondary metabolism
Source: PLoS Genet. 2018 Jul 25;14(7):e1007511. doi: 10.1371/journal.pgen.1007511 (PMC6078315; doi:10.1371/journal.pgen.1007511)
Supplement: S1 Table — Only genes with a false discovery rate (fdr; Benjamini-Hochberg corrected p-value) < 0.5 were accepted. (XLS) [file pgen.1007511.s010.xls]

## Sheet: Sheet1
stable_id	sys name	chr	start	stop	strand	tss	tes	std name	description (Ensembl)	biotype	Comp vs Delta (MultiEdgeR) fdr	Comp vs Delta (MultiEdgeR) log2FC	Comp vs Delta (MultiEdgeR) p_value	Comp vs Delta (MultiEdgeR) regulated_logFC_1.00_max_fdr_0.05	Comp vs Delta (MultiEdgeR) regulated_logFC_2.00_max_fdr_0.05	Comp vs WT (MultiEdgeR) fdr	Comp vs WT (MultiEdgeR) log2FC	Comp vs WT (MultiEdgeR) p_value	Comp vs WT (MultiEdgeR) regulated_logFC_1.00_max_fdr_0.05	Comp vs WT (MultiEdgeR) regulated_logFC_2.00_max_fdr_0.05	updated description (FungiDB)	Delta vs WT (MultiEdgeR) fdr	Delta vs WT (MultiEdgeR) log2FC	Delta vs WT (MultiEdgeR) p_value	Delta vs WT (MultiEdgeR) regulated_logFC_1.00_max_fdr_0.05	Delta vs WT (MultiEdgeR) regulated_logFC_2.00_max_fdr_0.05	Exon, protein coding, stranded tag count p409sComp1_Braus_ST_Ens_An_37	Exon, protein coding, stranded tag count p409sComp1_Braus_ST_Ens_An_37 CPM	Exon, protein coding, stranded tag count p409sComp2_Braus_ST_Ens_An_37	Exon, protein coding, stranded tag count p409sComp2_Braus_ST_Ens_An_37 CPM	Exon, protein coding, stranded tag count p409sComp3_Braus_ST_Ens_An_37	Exon, protein coding, stranded tag count p409sComp3_Braus_ST_Ens_An_37 CPM	Exon, protein coding, stranded tag count p409sWT1_Braus_ST_Ens_An_37	Exon, protein coding, stranded tag count p409sWT1_Braus_ST_Ens_An_37 CPM	Exon, protein coding, stranded tag count p409sWT2_Braus_ST_Ens_An_37	Exon, protein coding, stranded tag count p409sWT2_Braus_ST_Ens_An_37 CPM	Exon, protein coding, stranded tag count p409sWT3_Braus_ST_Ens_An_37	Exon, protein coding, stranded tag count p409sWT3_Braus_ST_Ens_An_37 CPM	Exon, protein coding, stranded tag count p409sdelta1_Braus_ST_Ens_An_37	Exon, protein coding, stranded tag count p409sdelta1_Braus_ST_Ens_An_37 CPM	Exon, protein coding, stranded tag count p409sdelta2_Braus_ST_Ens_An_37	Exon, protein coding, stranded tag count p409sdelta2_Braus_ST_Ens_An_37 CPM	Exon, protein coding, stranded tag count p409sdelta3_Braus_ST_Ens_An_37	Exon, protein coding, stranded tag count p409sdelta3_Braus_ST_Ens_An_37 CPM	parent_row	GO ID	GO name	categorization
	upregulated
CADANIAG00009975	ANIA_03103	VI	1763539	1764399	-1	1764399	1763539		conserved hypothetical protein	protein_coding	2.76661e-07	-5.89663	1.9452e-08	TRUE	TRUE				FALSE	FALSE	protein of unknown function	8.91998e-07	8.13563	5.93124e-09	TRUE	TRUE	452	38.5182	695	39.9414	376	47.9524	341	35.0283	627	44.489	647	45.2719	2954	156.285	3548	200.134	6566	273.644	10778	GO:0005575	cellular_component	unknown
CADANIAG00004140	ANIA_11049	II	773131	774430	1	773131	774430		conserved hypothetical protein	protein_coding	1.08293e-08	-7.07121	5.32687e-10	TRUE	TRUE				FALSE	FALSE	NmrA-like domain containing protein	1.65701e-06	7.0797	1.21386e-08	TRUE	TRUE	97	8.26607	153	8.79285	88	11.2229	121	12.4294	183	12.9848	177	12.385	583	30.8443	393	22.1682	597	24.8805	4062	GO:0005575	cellular_component	Secondary metabolism
CADANIAG00009189	ANIA_02469	VII	3992395	3993271	-1	3993271	3992395		short chain dehydrogenase, putative (AFU_orthologue; AFUA_5G01530)	protein_coding	0.00589305	-1.95963	0.00191964	TRUE	FALSE				FALSE	FALSE	Has domain(s) with predicted oxidoreductase activity and role in metabolic process	1.78156e-05	6.83112	2.06341e-07	TRUE	TRUE	12	1.02261	37	2.12638	11	1.40286	39	4.00617	30	2.12866	34	2.37905	231	12.2213	164	9.25083	606	25.2556	1743	GO:0005575; GO:0016491	cellular_component; oxidoreductase activity	unknown
CADANIAG00002597	ANIA_00146	VIII	4400317	4401170	1	4400317	4401170	mdpC	oxidoreductase, putative (Eurofung)	protein_coding	0.00012286	-6.2435	2.09728e-05	TRUE	TRUE				FALSE	FALSE	Protein with homology to versicolorin ketoreductase	0.000894708	6.24801	2.59146e-05	TRUE	TRUE	0	0	0	0	1	0.127533	0	0	0	0	0	0	35	1.85172	14	0.789705	89	3.70915	6963	GO:0047039	tetrahydroxynaphthalene reductase activity	Secondary metabolism
CADANIAG00002588	ANIA_10023	VIII	4379754	4381095	-1	4381095	4379754	mdpL	conserved hypothetical protein	protein_coding	0.00528368	-3.62315	0.00168483	TRUE	TRUE				FALSE	FALSE	Member of the monodictyphenone (mdp) secondary metabolite biosynthesis gene cluster	0.000829073	5.82411	2.30791e-05	TRUE	TRUE	874	74.4799	1152	66.205	676	86.2122	416	42.7325	875	62.0859	1283	89.774	2784	147.291	2290	129.173	3489	145.407	2892	GO:0005575	cellular_component	Secondary metabolism
CADANIAG00005178	ANIA_03568	II	3679465	3680499	1	3679465	3680499		conserved hypothetical protein	protein_coding	0.0149152	-2.27641	0.00576104	TRUE	TRUE				FALSE	FALSE	protein of unknown function	0.00741086	5.74801	0.000380023	TRUE	TRUE	22	1.87478	42	2.41372	24	3.06079	24	2.46534	12	0.851464	47	3.28868	97	5.13191	129	7.27657	318	13.2529	10870	GO:0005575	cellular_component	unknown
CADANIAG00000068	ANIA_11555	IV	176881	177316	1	176881	177316		hypothetical protein	protein_coding	1.01147e-06	-9.84244	8.51344e-08	TRUE	TRUE				FALSE	FALSE	ORF, Deleted, Uncharacterized	3.97158e-06	5.72475	3.22274e-08	TRUE	TRUE	29	2.4713	19	1.09192	20	2.55066	22	2.25989	26	1.84484	33	2.30907	108	5.71388	57	3.21523	95	3.95921	10127			unknown
CADANIAG00007908	ANIA_08951	VII	322495	323824	1	322495	323824		conserved hypothetical protein	protein_coding	6.4742e-08	-6.79544	3.77874e-09	TRUE	TRUE				FALSE	FALSE	protein of unknown function	1.28001e-05	4.65486	1.39931e-07	TRUE	TRUE	14	1.19304	25	1.43674	9	1.1478	10	1.02722	8	0.567643	17	1.18952	40	2.11625	41	2.31271	48	2.00044	2238	GO:0005575	cellular_component	unknown
CADANIAG00002187	ANIA_00501	VIII	3300175	3301928	-1	3301928	3300175		conserved hypothetical protein	protein_coding	0.0110941	-4.218	0.00404638	TRUE	TRUE				FALSE	FALSE	Ortholog(s) have role in fumiquinazoline C biosynthetic process	0.00845921	4.53299	0.000460475	TRUE	TRUE	0	0	3	0.172409	0	0	0	0	0	0	0	0	5	0.264531	2	0.112815	19	0.791841	2752			Secondary metabolism
CADANIAG00008239	ANIA_01602	VII	1267939	1269013	-1	1269013	1267939	eglD	beta-1,4-endoglucanase (Eurofung)	protein_coding	4.67763e-13	-4.19519	1.02249e-14	TRUE	TRUE	1	-0.0569052	1	FALSE	FALSE	Putative beta-1,4-endoglucanase	2.36368e-11	4.21112	5.32781e-14	TRUE	TRUE	1	0.0852173	1	0.0574696	1	0.127533	4	0.410889	2	0.141911	6	0.419832	60	3.17438	61	3.44086	62	2.5839	7638			Carbon metabolism
CADANIAG00003660	ANIA_05430	V	2581800	2583174	1	2581800	2583174		hypothetical protein	protein_coding	2.329e-05	-2.84863	2.98709e-06	TRUE	TRUE				FALSE	FALSE	protein of unknown function	4.0629e-05	3.78442	5.86105e-07	TRUE	TRUE	669	57.0103	932	53.5617	523	66.6997	550	56.4973	787	55.8419	1510	105.658	5757	304.581	2956	166.741	5326	221.966	105	GO:0005575	cellular_component	unknown
CADANIAG00003627	ANIA_05463	V	2474582	2475799	-1	2475799	2474582		conserved hypothetical protein	protein_coding	7.44509e-48	-4.32003	1.00666e-50	TRUE	TRUE	0.848903	-0.610859	0.404839	FALSE	FALSE	Has domain(s) with predicted starch binding activity and viral capsid localization	1.99334e-07	3.68184	1.01094e-09	TRUE	TRUE	73	6.22086	107	6.14925	61	7.7795	70	7.19056	27	1.91579	71	4.96801	296	15.6603	227	12.8045	381	15.8785	5151	GO:0019028	viral capsid	Other metabolic functions	Has domain(s) with predicted starch binding activity and viral capsid localization
CADANIAG00002788	ANIA_08325	V	128177	129577	-1	129577	128177		conserved hypothetical protein	protein_coding	1.24555e-54	-3.24906	1.12274e-57	TRUE	TRUE	0.888476	0.360947	0.5082	FALSE	FALSE	protein of unknown function	3.32056e-16	3.62125	2.24539e-19	TRUE	TRUE	279	23.7756	416	23.9074	208	26.5268	132	13.5593	148	10.5014	353	24.7001	882	46.6633	728	41.0647	875	36.4664	1344	GO:0005575	cellular_component	unknown
CADANIAG00009808	ANIA_03253	VI	1278566	1280269	1	1278566	1280269	CYP649A1	cytochrome P450, putative (Eurofung)	protein_coding	2.59637e-10	-3.58731	9.15678e-12	TRUE	TRUE	1	0.0046202	1	FALSE	FALSE	Putative cytochrome P450	2.59628e-11	3.52119	6.1447e-14	TRUE	TRUE	0	0	3	0.172409	1	0.127533	3	0.308167	2	0.141911	1	0.069972	11	0.581969	10	0.564075	26	1.08357	8282	GO:0005575; GO:0016705; GO:0020037; GO:0005506; GO:0009055	cellular_component; oxidoreductase activity, acting on paired donors, with incorporation or reduction of molecular oxygen; heme binding; iron ion binding; electron carrier activity	Secondary metabolism
CADANIAG00004149	ANIA_08116	II	797652	799179	-1	799179	797652		hypothetical protein	protein_coding	7.84377e-21	-4.00156	7.2472e-23	TRUE	TRUE				FALSE	FALSE	protein of unknown function	1.95045e-12	3.40806	3.5171e-15	TRUE	TRUE	612	52.153	798	45.8608	449	57.2623	508	52.1829	757	53.7132	984	68.8524	3482	184.22	2367	133.517	3330	138.781	8898	GO:0005575	cellular_component	unknown
CADANIAG00009807	ANIA_03254	VI	1276124	1277616	-1	1277616	1276124		conserved hypothetical protein	protein_coding	2.90131e-12	-2.8396	7.15929e-14	TRUE	TRUE	0.910992	0.59166	0.572584	FALSE	FALSE	Predicted transmembrane transporter	0.00178482	3.27649	6.01444e-05	TRUE	TRUE	43	3.66434	71	4.08034	38	4.84625	39	4.00617	38	2.6963	79	5.52778	354	18.7288	270	15.23	485	20.2128	5166			Secondary metabolism
CADANIAG00006572	ANIA_06407	I	280393	282197	-1	282197	280393		cytochrome P450, putative (Eurofung)	protein_coding	0.00023316	-4.03765	4.45041e-05	TRUE	TRUE				FALSE	FALSE	Ortholog(s) have oxidoreductase activity and role in steroid metabolic process	0.0130175	3.27028	0.000821573	TRUE	TRUE	102	8.69216	87	4.99986	61	7.7795	91	9.34773	53	3.76063	215	15.044	525	27.7758	376	21.2092	813	33.8825	9360	GO:0005575; GO:0016705; GO:0020037; GO:0005506; GO:0008202; GO:0009055; GO:0016491	cellular_component; oxidoreductase activity, acting on paired donors, with incorporation or reduction of molecular oxygen; heme binding; iron ion binding; steroid metabolic process; electron carrier activity; oxidoreductase activity	Respiratory chain	Ortholog(s) have oxidoreductase activity and role in steroid metabolic process
CADANIAG00007907	ANIA_08952	VII	319279	321183	-1	321183	319279	CYP676A1	cytochrome P450, putative (Eurofung)	protein_coding	1.38162e-19	-5.10131	1.41665e-21	TRUE	TRUE				FALSE	FALSE	Putative cytochrome P450	1.67685e-10	3.2417	4.91356e-13	TRUE	TRUE	82	6.98781	133	7.64346	52	6.63171	102	10.4777	53	3.76063	140	9.79607	429	22.6968	264	14.8916	406	16.9204	4500	GO:0005575; GO:0016705; GO:0020037; GO:0005506; GO:0009055	cellular_component; oxidoreductase activity, acting on paired donors, with incorporation or reduction of molecular oxygen; heme binding; iron ion binding; electron carrier activity	Respiratory chain
CADANIAG00003523	ANIA_05558	V	2155929	2157577	-1	2157577	2155929	prtA	alkaline protease (Eurofung)	protein_coding	2.19391e-125	-3.82465	2.47202e-129	TRUE	TRUE	0.751511	-0.589603	0.161479	FALSE	FALSE	Broad specificity thermostable alkaline protease	3.24875e-09	3.2335	1.20826e-11	TRUE	TRUE	292	24.8834	316	18.1604	193	24.6138	229	23.5234	186	13.1977	366	25.6097	1273	67.3497	937	52.8539	1742	72.5994	6833			Protein degradation
CADANIAG00007954	ANIA_08913	VII	470131	470799	1	470131	470799		hypothetical protein	protein_coding	7.62175e-67	-3.6273	3.43515e-70	TRUE	TRUE	0.775422	-0.392696	0.240292	FALSE	FALSE	Predicted glycosylphosphatidylinositol (GPI)-anchored protein	4.32471e-14	3.22935	5.84881e-17	TRUE	TRUE	871	74.2242	1181	67.8716	626	79.8356	408	41.9107	512	36.3291	1087	76.0595	2390	126.446	1948	109.882	3035	126.486	427	GO:0005575	cellular_component	unknown	Predicted glycosylphosphatidylinositol (GPI)-anchored protein
CADANIAG00002154	ANIA_00531	VIII	3212748	3213235	1	3212748	3213235		conserved hypothetical protein	protein_coding	1.82343e-17	-3.73503	2.32166e-19	TRUE	TRUE	0.872818	-0.558241	0.471914	FALSE	FALSE	protein of unknown function	0.00477595	3.17355	0.000212867	TRUE	TRUE	0	0	0	0	0	0	0	0	2	0.141911	3	0.209916	107	5.66097	34	1.91786	325	13.5447	4174	GO:0005575	cellular_component	unknown
CADANIAG00001382	ANIA_01241	VIII	1042517	1043304	1	1042517	1043304		conserved hypothetical protein	protein_coding	2.8869e-65	-3.47597	1.62642e-68	TRUE	TRUE	0.842837	-0.409532	0.389957	FALSE	FALSE	ANIA_01240 and ANIA_01241 were merged to ANIA_11934	2.3874e-14	3.04124	2.69063e-17	TRUE	TRUE	27	2.30087	40	2.29879	16	2.04053	20	2.05445	9	0.638598	36	2.51899	418	22.1148	318	17.9376	572	23.8386	5165			Secondary metabolism	ORF deleted
CADANIAG00002188	ANIA_00500	VIII	3304378	3305857	1	3304378	3305857		conserved hypothetical protein	protein_coding	5.7581e-27	-3.9631	2.98448e-29	TRUE	TRUE	0.732639	-1.00142	0.0355708	FALSE	FALSE	protein of unknown function	6.8463e-13	2.95979	1.00306e-15	TRUE	TRUE	0	0	0	0	1	0.127533	0	0	0	0	0	0	11	0.581969	3	0.169223	12	0.50011	10874	GO:0005575	cellular_component	unknown
CADANIAG00002734	ANIA_10005	VIII	4776217	4777155	-1	4777155	4776217		hypothetical protein	protein_coding	0.105821	-1.81195	0.0597011	FALSE	FALSE				FALSE	FALSE	Has domain(s) with predicted oxidoreductase activity and role in metabolic process	0.0408789	2.78613	0.00386997	TRUE	TRUE	37	3.15304	60	3.44818	20	2.55066	38	3.90345	53	3.76063	77	5.38784	223	11.7981	119	6.7125	237	9.87718	3329	GO:0005575; GO:0016491	cellular_component; oxidoreductase activity	unknown	Has domain(s) with predicted oxidoreductase activity and role in metabolic process
CADANIAG00008402	ANIA_01756	VII	1754484	1754820	1	1754484	1754820		conserved hypothetical protein	protein_coding	5.83489e-07	-3.22254	4.56272e-08	TRUE	TRUE	0.871087	-0.594759	0.464425	FALSE	FALSE	protein of unknown function	5.80302e-05	2.61187	8.82912e-07	TRUE	TRUE	544	46.3582	792	45.5159	386	49.2277	363	37.2882	819	58.1124	1669	116.783	14691	777.246	9576	540.158	16307	679.608	5956	GO:0005575	cellular_component	unknown
CADANIAG00000324	ANIA_10900	IV	890891	892717	1	890891	892717		serine peptidase, family S28, putative (AFU_orthologue; AFUA_4G03790)	protein_coding	2.60884e-05	-3.49135	3.4275e-06	TRUE	TRUE				FALSE	FALSE	Has domain(s) with predicted serine-type peptidase activity and role in proteolysis	0.00605898	2.60688	0.000294994	TRUE	TRUE	34	2.89739	46	2.6436	17	2.16806	17	1.74628	29	2.0577	27	1.88924	87	4.60284	65	3.66649	87	3.6258	4954	GO:0005575	cellular_component	Protein degradation
CADANIAG00001381	ANIA_01242	VIII	1019460	1038626	-1	1038626	1019460	nlsA	nonribosomal peptide synthase, putative (Eurofung)	protein_coding	5.92473e-23	-2.93744	4.53951e-25	TRUE	TRUE	0.883827	-0.432868	0.495562	FALSE	FALSE	Putative nonribosomal peptide synthase (NRPS)	0.00263291	2.504	9.82315e-05	TRUE	TRUE	8	0.681738	7	0.402287	15	1.91299	3	0.308167	14	0.993375	21	1.46941	294	15.5544	139	7.84065	236	9.8355	6781	GO:0005575	cellular_component	Secondary metabolism
CADANIAG00003297	ANIA_05762	V	1518978	1519727	1	1518978	1519727		CFEM domain protein, putative (AFU_orthologue; AFUA_6G06690)	protein_coding	1.85824e-36	-3.21723	5.23448e-39	TRUE	TRUE	0.785712	-0.707028	0.259646	FALSE	FALSE	protein of unknown function	0.000175689	2.50141	3.20766e-06	TRUE	TRUE	5	0.426086	11	0.632166	7	0.89273	6	0.616334	4	0.283821	4	0.279888	16	0.8465	18	1.01534	37	1.54201	2348	GO:0005575	cellular_component	unknown	(GPI)-anchored protein
CADANIAG00010283	ANIA_02818	VI	2660725	2662845	-1	2662845	2660725		conserved hypothetical protein	protein_coding	0.0360579	-1.51733	0.0164261	TRUE	FALSE				FALSE	FALSE	Acylaminoacyl-peptidase	0.0242206	2.49417	0.00187803	TRUE	TRUE	12	1.02261	12	0.689636	4	0.510131	9	0.924501	25	1.77388	68	4.75809	378	19.9986	213	12.0148	208	8.66858	5352	GO:0005575	cellular_component	Protein degradation
CADANIAG00004019	ANIA_07999	II	443454	444438	-1	444438	443454		conserved hypothetical protein	protein_coding	2.72481e-09	-2.55986	1.19266e-10	TRUE	TRUE	0.992405	-0.119912	0.885167	FALSE	FALSE	Has domain(s) with predicted oxidoreductase activity and role in metabolic process	8.01371e-07	2.4813	5.05768e-09	TRUE	TRUE	20	1.70435	11	0.632166	11	1.40286	15	1.54083	24	1.70293	14	0.979607	65	3.43891	74	4.17416	87	3.6258	1716	GO:0005575; GO:0016491	cellular_component; oxidoreductase activity	unknown	Has domain(s) with predicted oxidoreductase activity and role in metabolic process
CADANIAG00004215	ANIA_08175	II	1011786	1013716	1	1011786	1013716		conserved hypothetical protein	protein_coding	1.08293e-08	-3.33277	5.33228e-10	TRUE	TRUE	0.732639	-0.849	0.0505557	FALSE	FALSE	protein of unknown function	1.39185e-05	2.46907	1.56789e-07	TRUE	TRUE	18	1.53391	11	0.632166	4	0.510131	8	0.821779	11	0.780509	25	1.7493	60	3.17438	30	1.69223	93	3.87586	8718	GO:0019028	viral capsid	unknown
CADANIAG00001383	ANIA_01240	VIII	1043662	1047696	1	1043662	1047696		ABC multidrug transporter (Eurofung)	protein_coding	8.15993e-41	-3.10561	1.83886e-43	TRUE	TRUE	0.751511	-0.64525	0.165991	FALSE	FALSE	ABC multidrug transporter; ANIA_01240 and ANIA_01241 were merged to ANIA_11934	6.61729e-06	2.45146	6.56285e-08	TRUE	TRUE	9	0.766955	12	0.689636	7	0.89273	10	1.02722	4	0.283821	32	2.2391	367	19.4166	217	12.2404	346	14.4198	6074			Transmembrane transport	ORF, Deleted
CADANIAG00009809	ANIA_03252	VI	1281279	1285324	1	1281279	1285324		terpene synthase family protein (AFU_orthologue; AFUA_5G15060)	protein_coding	1.7495e-05	-1.70013	2.14869e-06	TRUE	FALSE	0.806073	0.721254	0.296324	FALSE	FALSE	Protein with homology to entkaurene synthases	2.52483e-06	2.44411	1.9065e-08	TRUE	TRUE	16	1.36348	30	1.72409	11	1.40286	21	2.15717	24	1.70293	32	2.2391	248	13.1208	118	6.65609	218	9.08534	4067	GO:0005575	cellular_component	Secondary metabolism
CADANIAG00000284	ANIA_07171	IV	785607	786296	1	785607	786296	ngn13	hypothetical protein	protein_coding	0.00184674	-2.14679	0.000497943	TRUE	TRUE				FALSE	FALSE	Putative GNAT-type acetyltransferase	0.00626923	2.43821	0.000308366	TRUE	TRUE	33	2.81217	56	3.2183	31	3.95352	32	3.28711	24	1.70293	43	3.00879	142	7.51269	109	6.14842	195	8.12679	7506	GO:0005575	cellular_component	Other metabolic functions	Putative GNAT-type acetyltransferase
CADANIAG00002965	ANIA_08480	V	616414	620944	-1	620944	616414		conserved hypothetical protein	protein_coding	3.53074e-20	-4.15303	3.5009e-22	TRUE	TRUE	0.732639	-1.73103	0.00829512	FALSE	FALSE	Putative glucan 1,3-beta-glucosidase with a predicted role in glucan metabolism	0.00198763	2.4286	6.85466e-05	TRUE	TRUE	33	2.81217	30	1.72409	17	2.16806	40	4.10889	28	1.98675	36	2.51899	157	8.30628	81	4.56901	203	8.4602	4561	GO:0005575	cellular_component	Carbon metabolism	Putative glucan 1,3-beta-glucosidase with a predicted role in glucan metabolism
CADANIAG00007578	ANIA_06784	I	3102075	3103468	-1	3103468	3102075		DMATS type aromatic prenyltransferase, putative (JCVI)	protein_coding	0.000498479	-2.75784	0.000106941	TRUE	TRUE				FALSE	FALSE	Dimethyl-allyl-tryptophan synthase (DMATS) type aromatic prenyltransferase	0.00902114	2.41396	0.000511069	TRUE	TRUE	1726	147.085	2151	123.617	1148	146.408	1593	163.637	1198	85.0045	3132	219.152	9338	494.039	7196	405.909	10895	454.059	6610	GO:0005575	cellular_component	Secondary metabolism
CADANIAG00008038	ANIA_01426	VII	696733	698825	1	696733	698825		hypothetical serine carboxypeptidase (Eurofung)	protein_coding	1.46488e-31	-2.63387	6.10709e-34	TRUE	TRUE	0.842837	-0.219928	0.386517	FALSE	FALSE	Ortholog(s) have serine-type carboxypeptidase activity	2.16397e-36	2.4087	2.43883e-40	TRUE	TRUE	8	0.681738	9	0.517227	17	2.16806	1	0.102722	3	0.212866	26	1.81927	160	8.465	105	5.92279	169	7.04322	6780	GO:0005575	cellular_component	Protein degradation
CADANIAG00005298	ANIA_10629	III	31166	32699	-1	32699	31166		conserved hypothetical protein	protein_coding	0.0333363	-1.52348	0.0149755	TRUE	FALSE				FALSE	FALSE	Has domain(s) with predicted role in lipid metabolic process	0.0346927	2.40375	0.00316312	TRUE	TRUE	156	13.2939	211	12.1261	109	13.9011	83	8.52595	189	13.4106	191	13.3646	470	24.8659	426	24.0296	600	25.0055	5149	GO:0005575	cellular_component	Other metabolic functions	Has domain(s) with predicted role in lipid metabolic process
CADANIAG00002492	ANIA_00234	VIII	4147260	4148106	-1	4148106	4147260		conserved hypothetical protein	protein_coding	1.67787e-20	-2.3195	1.64479e-22	TRUE	TRUE	1	0.0123331	0.934363	FALSE	FALSE	Has domain(s) with predicted hydrolase activity	1.85629e-18	2.33449	1.04603e-21	TRUE	TRUE	0	0	0	0	0	0	0	0	0	0	0	0	17	0.899406	11	0.620483	36	1.50033	1666	GO:0005575	cellular_component	Other metabolic functions	Has domain(s) with predicted hydrolase activity
CADANIAG00003670	ANIA_05421	V	2607656	2609700	1	2607656	2609700		steroid monooxygenase (CpmA), putative (AFU_orthologue; AFUA_5G07490)	protein_coding	3.0817e-08	-2.14248	1.65283e-09	TRUE	TRUE	0.958252	0.175397	0.737619	FALSE	FALSE	unknown	2.17447e-05	2.28408	2.76925e-07	TRUE	TRUE	78	6.64695	273	15.6892	62	7.90704	192	19.7227	63	4.47019	161	11.2655	788	41.6901	586	33.0548	924	38.5085	5496	GO:0005575	cellular_component	other
CADANIAG00006459	ANIA_08593	III	3363526	3365024	1	3363526	3365024		chlorohydrolase family protein, putative (AFU_orthologue; AFUA_4G00460)	protein_coding	0.00125376	-1.77099	0.000313262	TRUE	FALSE	0.961808	0.434818	0.752154	FALSE	FALSE	unknown	0.0046458	2.27227	0.000204723	TRUE	TRUE	6	0.511304	23	1.3218	5	0.637664	8	0.821779	31	2.19962	22	1.53938	80	4.2325	64	3.61008	93	3.87586	7673	GO:0005575	cellular_component	Other metabolic functions
CADANIAG00002966	ANIA_08481	V	622979	628708	1	622979	628708		conserved hypothetical protein	protein_coding	1.81247e-10	-2.96968	6.24919e-12	TRUE	TRUE	0.757375	-0.696602	0.211029	FALSE	FALSE	Putative chitinase	0.000805851	2.26189	2.19786e-05	TRUE	TRUE	5	0.426086	21	1.20686	8	1.02026	4	0.410889	6	0.425732	8	0.559776	16	0.8465	21	1.18456	36	1.50033	5341	GO:0005575	cellular_component	Cell wall/Membranes	Putative chitinase; glycoside hydrolase family 18 (GH18) protein with a predicted role in chitin, cell wall
CADANIAG00000170	ANIA_07272	IV	473392	475994	1	473392	475994		ABC transporter, putative (Eurofung)	protein_coding	0.00497122	-1.65089	0.00156838	TRUE	FALSE				FALSE	FALSE	Has domain(s) with predicted ATP binding, ATPase activity, ATPase activity, coupled to transmembrane movement of substances activity, role in transmembrane transport and integral component of membrane localization	0.00140693	2.25354	4.49832e-05	TRUE	TRUE	11	0.93739	9	0.517227	6	0.765197	5	0.513612	4	0.283821	16	1.11955	33	1.74591	27	1.523	49	2.04212	6220			Transmembrane transport
CADANIAG00003611	ANIA_05477	V	2423303	2424757	-1	2424757	2423303		conserved hypothetical protein	protein_coding	0.25506	-1.0225	0.175596	FALSE	FALSE				FALSE	FALSE	protein of unknown function	0.0315218	2.24651	0.00277134	TRUE	TRUE	9	0.766955	1	0.0574696	2	0.255066	2	0.205445	6	0.425732	2	0.139944	15	0.793594	15	0.846113	21	0.875193	1226	GO:0005575	cellular_component	unknown
CADANIAG00006436	ANIA_08611	III	3315692	3316779	-1	3316779	3315692		conserved hypothetical protein	protein_coding	3.33902e-17	-2.65422	4.51473e-19	TRUE	TRUE	0.782898	-0.412101	0.255795	FALSE	FALSE	Has domain(s) with predicted catalytic activity and role in nucleoside metabolic process	1.99414e-08	2.24256	8.09071e-11	TRUE	TRUE	12	1.02261	10	0.574696	10	1.27533	3	0.308167	16	1.13529	8	0.559776	41	2.16916	23	1.29737	41	1.70871	1128	GO:0005575	cellular_component	Nucleotide metabolism	Has domain(s) with predicted catalytic activity and role in nucleoside metabolic process
CADANIAG00008512	ANIA_01858	VII	2031871	2033293	1	2031871	2033293		conserved hypothetical protein	protein_coding	0.000325967	-2.73874	6.54138e-05	TRUE	TRUE				FALSE	FALSE	Has domain(s) with predicted catalytic activity and role in nucleoside metabolic process	0.0226234	2.18759	0.00169898	TRUE	TRUE	27	2.30087	37	2.12638	21	2.67819	20	2.05445	30	2.12866	73	5.10795	568	30.0508	402	22.6758	596	24.8388	9573	GO:0005575; GO:0020037	cellular_component; heme binding	Other metabolic functions	Putative tryptophan 2,3-dioxygenase with a predicted role in aromatic amino acid biosynthesis
CADANIAG00002789	ANIA_08326	V	131474	131869	1	131474	131869		hypothetical protein	protein_coding	7.98385e-27	-2.12573	4.22807e-29	TRUE	TRUE	1	0.0315169	0.933449	FALSE	FALSE	protein of unknown function	2.36368e-11	2.14437	5.1251e-14	TRUE	TRUE	7	0.596521	38	2.18385	6	0.765197	11	1.12995	13	0.922419	14	0.979607	45	2.38078	37	2.08708	75	3.12569	4079	GO:0005575	cellular_component	unknown
CADANIAG00000253	ANIA_07201	IV	696380	698530	1	696380	698530		alkaline serine protease AorO, putative (AFU_orthologue; AFUA_6G10250)	protein_coding	0.000149044	-2.07422	2.61929e-05	TRUE	TRUE	1	0.0505871	0.939647	FALSE	FALSE	Ortholog(s) have role in proteolysis	0.00928104	2.11342	0.000534499	TRUE	TRUE	43	3.66434	40	2.29879	41	5.22885	9	0.924501	73	5.17974	50	3.4986	169	8.94116	129	7.27657	252	10.5023	4280	GO:0005575	cellular_component	Protein degradation
CADANIAG00003682	ANIA_05410	V	2636053	2636668	-1	2636668	2636053		hypothetical protein	protein_coding	3.05267e-10	-1.98227	1.12132e-11	TRUE	FALSE	0.999349	0.0816818	0.912818	FALSE	FALSE	Predicted glycosylphosphatidylinositol (GPI)-anchored protein	0.020645	2.08494	0.00147355	TRUE	TRUE	22	1.87478	24	1.37927	26	3.31585	27	2.7735	14	0.993375	50	3.4986	168	8.88825	122	6.88172	179	7.45998	6688	GO:0005575	cellular_component	unknown	(GPI)-anchored protein
CADANIAG00002881	ANIA_11607	V	382953	383223	1	382953	383223		hypothetical protein	protein_coding	1.48711e-08	-2.17013	7.48999e-10	TRUE	TRUE	1	-0.0907116	0.954523	FALSE	FALSE	protein of unknown function; ORF, Deleted	0.0314245	2.05753	0.00275535	TRUE	TRUE	92	7.83999	131	7.52852	66	8.41717	111	11.4022	95	6.74076	130	9.09635	345	18.2527	292	16.471	471	19.6293	7225			unknown	ORF, Deleted
CADANIAG00000413	ANIA_07058	IV	1170060	1171213	1	1170060	1171213		conserved hypothetical protein	protein_coding	6.24167e-07	-1.79791	4.93004e-08	TRUE	FALSE	0.938247	0.255539	0.653753	FALSE	FALSE	protein of unknown function	4.76679e-06	2.05168	4.35152e-08	TRUE	TRUE	12	1.02261	5	0.287348	5	0.637664	10	1.02722	5	0.354777	19	1.32947	44	2.32788	38	2.14349	74	3.08401	2894	GO:0005575	cellular_component	unknown
CADANIAG00009806	ANIA_03255	VI	1274190	1275768	1	1274190	1275768		glutathione transferase 1 (Eurofung)	protein_coding	5.44855e-21	-1.8521	4.97277e-23	TRUE	FALSE	0.876023	0.194946	0.481108	FALSE	FALSE	Predicted glutathione peroxidase	2.76346e-14	2.03473	3.4259e-17	TRUE	TRUE	89	7.58434	47	2.70107	73	9.3099	14	1.43811	118	8.37273	128	8.95641	611	32.3257	373	21.04	680	28.3396	4359			Secondary metabolism
CADANIAG00001603	ANIA_01041	VIII	1646471	1647828	-1	1647828	1646471		endoglucanase, putative (AFU_orthologue; AFUA_1G12560)	protein_coding	1.34723e-47	-2.07527	1.97341e-50	TRUE	TRUE	0.957893	-0.0550213	0.736507	FALSE	FALSE	Putative beta-1,4-endoglucanase	3.41418e-20	2.02007	1.53913e-23	TRUE	TRUE	1	0.0852173	3	0.172409	0	0	0	0	0	0	2	0.139944	15	0.793594	12	0.67689	23	0.958545	6108	GO:0005575	cellular_component	Carbon metabolism
CADANIAG00003104	ANIA_05120	V	1008899	1009814	1	1008899	1009814		conserved hypothetical protein	protein_coding	5.66435e-28	-2.38263	2.80824e-30	TRUE	TRUE	0.769444	-0.410381	0.231625	FALSE	FALSE	protein of unknown function	4.18571e-15	2.00815	3.30215e-18	TRUE	TRUE	8	0.681738	3	0.172409	3	0.382599	3	0.308167	11	0.780509	12	0.839663	44	2.32788	34	1.91786	63	2.62558	5283	GO:0005575	cellular_component	unknown	Protein of unknown function; transcript is induced by nitrate; predicted NirA binding site in promoter
CADANIAG00004133	ANIA_08101	II	753994	754902	-1	754902	753994		conserved hypothetical protein	protein_coding	1.14631e-10	-1.63719	3.88776e-12	TRUE	FALSE	0.914361	0.396357	0.578813	FALSE	FALSE	putative bZIP protein	0.0450126	2.00614	0.00453018	TRUE	TRUE	9	0.766955	8	0.459757	5	0.637664	4	0.410889	19	1.34815	10	0.69972	49	2.59241	29	1.63582	59	2.45888	1358	GO:0005575	cellular_component	Transcription factor
CADANIAG00004027	ANIA_08007	II	482223	484161	1	482223	484161	abnC	endoarabinanase (Eurofung)	protein_coding	1.26469e-21	-2.6027	1.026e-23	TRUE	TRUE	0.740171	-0.638446	0.130012	FALSE	FALSE	Protein with arabinan endo-1,5-alpha-L-arabinosidase activity, involved in degradation of pectin	3.16337e-05	1.96918	4.3495e-07	TRUE	FALSE	29	2.4713	12	0.689636	11	1.40286	13	1.33539	26	1.84484	29	2.02919	85	4.49703	78	4.39979	124	5.16781	5704			Carbon metabolism
CADANIAG00002584	ANIA_10036	VIII	4371674	4373567	1	4371674	4373567		conserved hypothetical protein	protein_coding	5.59797e-05	-1.81963	8.47107e-06	TRUE	FALSE	0.967247	0.145934	0.785697	FALSE	FALSE	Has domain(s) with predicted role in transmembrane transport and integral component of membrane localization	0.00894139	1.95911	0.000501931	TRUE	FALSE	27	2.30087	44	2.52866	15	1.91299	18	1.849	17	1.20624	25	1.7493	71	3.75634	51	2.87678	83	3.4591	6354			unknown	Has domain(s) with predicted role in transmembrane transport and integral component of membrane localization
CADANIAG00002089	ANIA_00586	VIII	3018999	3021160	1	3018999	3021160		conserved hypothetical protein	protein_coding	0.00542874	-1.73713	0.00174087	TRUE	FALSE				FALSE	FALSE	protein of unknown function	0.0312856	1.9476	0.00272629	TRUE	FALSE	0	0	0	0	0	0	0	0	1	0.0709553	0	0	15	0.793594	11	0.620483	26	1.08357	7639	GO:0005575	cellular_component	unknown
CADANIAG00006524	ANIA_06450	I	131393	132282	1	131393	132282		oxidoreductase, short-chain dehydrogenase/reductase family, putative (AFU_orthologue; AFUA_5G01040)	protein_coding	1.44187e-07	-2.20369	9.35797e-09	TRUE	TRUE	0.919763	-0.266413	0.598461	FALSE	FALSE	Tetrahydroxynaphthalene reductase	0.000393979	1.92984	9.12901e-06	TRUE	FALSE	17	1.44869	17	0.976984	4	0.510131	8	0.821779	11	0.780509	17	1.18952	56	2.96275	43	2.42552	68	2.83396	10166	GO:0047039	tetrahydroxynaphthalene reductase activity	Secondary metabolism
CADANIAG00004086	ANIA_08060	II	625876	626951	-1	626951	625876		oxidoreductase CipA-like, putative (AFU_orthologue; AFUA_1G01630)	protein_coding	2.42668e-10	-2.06864	8.47629e-12	TRUE	TRUE	1	-0.0853252	0.933073	FALSE	FALSE	Has domain(s) with predicted NAD binding, oxidoreductase activity, acting on the aldehyde or oxo group of donors, NAD or NADP as acceptor activity and role in cellular amino acid metabolic process, oxidation-reduction process	0.0077204	1.92659	0.000407207	TRUE	FALSE	31	2.64173	10	0.574696	24	3.06079	9	0.924501	64	4.54114	47	3.28868	152	8.04175	124	6.99453	205	8.54355	7157			unknown
CADANIAG00005143	ANIA_03601	II	3587833	3589072	1	3587833	3589072		conserved hypothetical protein	protein_coding	0.000134404	-1.57813	2.32916e-05	TRUE	FALSE	0.944162	0.316458	0.672011	FALSE	FALSE	Has domain(s) with predicted catalytic activity and role in metabolic process	0.000856946	1.89717	2.43379e-05	TRUE	FALSE	2	0.170435	5	0.287348	1	0.127533	2	0.205445	3	0.212866	2	0.139944	20	1.05813	10	0.564075	14	0.583462	10342	GO:0005575	cellular_component	Other metabolic functions	Has domain(s) with predicted catalytic activity and role in metabolic process
CADANIAG00009836	ANIA_03226	VI	1356203	1357397	1	1356203	1357397	pkfC	conserved hypothetical protein	protein_coding	1.8466e-28	-1.96162	8.9469e-31	TRUE	FALSE	0.968616	-0.0683704	0.788921	FALSE	FALSE	Has domain protein	2.00785e-07	1.89377	1.04092e-09	TRUE	FALSE	5	0.426086	0	0	4	0.510131	1	0.102722	1	0.0709553	2	0.139944	12	0.634875	7	0.394853	13	0.541786	6052	GO:0005575; GO:0016491	cellular_component; oxidoreductase activity	Secondary metabolism
CADANIAG00007137	ANIA_05896	I	1868238	1868754	-1	1868754	1868238		conserved hypothetical protein	protein_coding	0.00138742	-1.4377	0.000352677	TRUE	FALSE	0.94998	0.396447	0.693728	FALSE	FALSE	protein of unknown function	0.00120897	1.85504	3.7197e-05	TRUE	FALSE	147	12.5269	127	7.29864	80	10.2026	54	5.54701	199	14.1201	184	12.8748	774	40.9494	496	27.9781	696	29.0064	5356	GO:0005575	cellular_component	unknown
CADANIAG00001080	ANIA_11210	VIII	223176	223977	1	223176	223977		conserved hypothetical protein	protein_coding	3.56046e-06	-2.58439	3.4702e-07	TRUE	TRUE				FALSE	FALSE	protein of unknown function	0.001468	1.84323	4.75064e-05	TRUE	FALSE	33	2.81217	43	2.47119	22	2.80572	22	2.25989	36	2.55439	24	1.67933	78	4.12669	88	4.96386	99	4.12591	6827	GO:0005575	cellular_component	unknown	Protein of unknown function; transcript repressed by nitrate
CADANIAG00008891	ANIA_02207	VII	3147996	3148940	1	3147996	3148940		O-methyltransferase, putative (AFU_orthologue; AFUA_5G06990)	protein_coding	6.73359e-07	-2.82456	5.40204e-08	TRUE	TRUE	0.740171	-0.970904	0.131983	FALSE	FALSE	Has domain(s) with predicted O-methyltransferase activity	0.0103386	1.84156	0.000621041	TRUE	FALSE	1	0.0852173	1	0.0574696	0	0	2	0.205445	1	0.0709553	1	0.069972	10	0.529063	11	0.620483	21	0.875193	4432	GO:0005575	cellular_component	unknown
CADANIAG00004219	ANIA_08177	II	1025724	1028781	1	1025724	1028781		Putative Zn(II)2Cys6 transcription factor (Eurofung)	protein_coding	2.44756e-12	-1.58101	5.92931e-14	TRUE	FALSE	0.865475	0.270813	0.451224	FALSE	FALSE	Putative glucose responsive transcription factor	2.09179e-07	1.83375	1.10801e-09	TRUE	FALSE	490	41.7565	530	30.4589	297	37.8773	257	26.3996	475	33.7038	674	47.1611	1972	104.331	1386	78.1808	2240	93.3539	10194			Transcription factor
CADANIAG00008233	ANIA_01600	VII	1249096	1250053	-1	1250053	1249096		conserved hypothetical protein	protein_coding	1.50618e-05	-1.3102	1.80233e-06	TRUE	FALSE	0.757375	0.530931	0.210787	FALSE	FALSE	protein of unknown function	1.28001e-05	1.8259	1.37674e-07	TRUE	FALSE	1	0.0852173	0	0	0	0	0	0	2	0.141911	0	0	19	1.00522	5	0.282038	10	0.416759	102	GO:0005575	cellular_component	unknown
CADANIAG00007903	ANIA_08955	VII	305461	307205	-1	307205	305461		hypothetical protein	protein_coding	9.5386e-12	-2.2456	2.64522e-13	TRUE	TRUE	0.910347	-0.391296	0.568699	FALSE	FALSE	Has domain(s) with predicted role in transmembrane transport and integral component of membrane localization	1.28001e-05	1.82587	1.39121e-07	TRUE	FALSE	352	29.9965	368	21.1488	206	26.2718	292	29.9949	334	23.6991	513	35.8956	1296	68.5665	1092	61.597	1707	71.1407	7224			unknown	Has domain(s) with predicted role in transmembrane transport and integral component of membrane localization
CADANIAG00009052	ANIA_02352	VII	3599218	3599890	1	3599218	3599890		conserved hypothetical protein	protein_coding	0.000143274	-2.33882	2.50063e-05	TRUE	TRUE				FALSE	FALSE	protein of unknown function	0.00922577	1.80919	0.00052831	TRUE	FALSE	24	2.04521	24	1.37927	11	1.40286	12	1.23267	21	1.49006	73	5.10795	341	18.041	212	11.9584	358	14.92	5705	GO:0005575	cellular_component	unknown
CADANIAG00003720	ANIA_05373	V	2754288	2755303	1	2754288	2755303		conserved hypothetical protein	protein_coding	1.5254e-11	-2.33493	4.36567e-13	TRUE	TRUE	0.857266	-0.551492	0.427842	FALSE	FALSE	Has domain(s) with predicted oxidoreductase activity and role in metabolic process	0.043504	1.76781	0.00425524	TRUE	FALSE	284	24.2017	280	16.0915	200	25.5066	121	12.4294	173	12.2753	192	13.4346	865	45.7639	651	36.7213	1025	42.7178	7621	GO:0005575; GO:0016491	cellular_component; oxidoreductase activity	unknown	Has domain(s) with predicted oxidoreductase activity and role in metabolic process
CADANIAG00009920	ANIA_03151	VI	1608594	1609077	1	1608594	1609077		conserved hypothetical protein	protein_coding	0.139316	-1.12271	0.083731	FALSE	FALSE				FALSE	FALSE	protein of unknown function	0.0469514	1.76741	0.00477874	TRUE	FALSE	8	0.681738	14	0.804575	11	1.40286	5	0.513612	8	0.567643	19	1.32947	85	4.49703	48	2.70756	117	4.87608	6118	GO:0005575	cellular_component	unknown
CADANIAG00002900	ANIA_08422	V	434365	435115	-1	435115	434365	mrvB1	conserved hypothetical protein	protein_coding	5.10198e-08	-2.55635	2.91459e-09	TRUE	TRUE	0.828013	-0.734312	0.345889	FALSE	FALSE	protein of unknown function	0.000480661	1.76676	1.18635e-05	TRUE	FALSE	5748	489.829	4717	271.084	3997	509.749	1984	203.801	7280	516.555	7783	544.592	22114	1169.97	17849	1006.82	24472	1019.89	7712	GO:0005575	cellular_component	unknown	Characterization of AnNce102 and its role in eisosome stability and sphingolipid biosynthesis
CADANIAG00006913	ANIA_06101	I	1259880	1261769	-1	1261769	1259880	CYP671B11	cytochrome P450, putative (Eurofung)	protein_coding	1.70549e-10	-1.88135	5.86112e-12	TRUE	FALSE	0.977369	-0.123182	0.828577	FALSE	FALSE	Putative cytochrome P450	1.28001e-05	1.74672	1.38374e-07	TRUE	FALSE	13	1.10782	7	0.402287	4	0.510131	3	0.308167	9	0.638598	12	0.839663	46	2.43369	29	1.63582	37	1.54201	10794	GO:0005575; GO:0016705; GO:0020037; GO:0005506; GO:0009055	cellular_component; oxidoreductase activity, acting on paired donors, with incorporation or reduction of molecular oxygen; heme binding; iron ion binding; electron carrier activity	unknown
CADANIAG00006428	ANIA_08619	III	3291724	3292806	-1	3292806	3291724		conserved hypothetical protein	protein_coding	0.00313401	-1.57019	0.000923077	TRUE	FALSE				FALSE	FALSE	protein of unknown function	0.00807364	1.72564	0.000433118	TRUE	FALSE	46	3.91999	62	3.56312	37	4.71872	27	2.7735	36	2.55439	96	6.71731	206	10.8987	157	8.85598	224	9.33539	7588	GO:0005575	cellular_component	unknown
CADANIAG00007894	ANIA_08963	VII	279666	280147	1	279666	280147		conserved hypothetical protein	protein_coding	4.65387e-07	-0.94285	3.5081e-08	FALSE	FALSE	0.543832	0.776711	0.000625095	FALSE	FALSE	protein of unknown function	2.51944e-21	1.71347	8.51835e-25	TRUE	FALSE	76	6.47651	94	5.40214	35	4.46365	101	10.375	58	4.11541	108	7.55697	375	19.8398	243	13.707	374	15.5868	1742	GO:0005575	cellular_component	unknown
CADANIAG00005691	ANIA_10582	III	1135917	1137692	-1	1137692	1135917		FAD binding monooxygenase, putative (JCVI)	protein_coding	0.000572701	-1.35475	0.000125962	TRUE	FALSE	0.850206	0.324151	0.407391	FALSE	FALSE	Has domain(s) with predicted FAD binding, cytochrome-c oxidase activity, oxidoreductase activity, role in metabolic process and mitochondrial respiratory chain complex IV localization	1.22657e-06	1.68141	8.70886e-09	TRUE	FALSE	74	6.30608	105	6.03431	43	5.48391	104	10.6831	60	4.25732	119	8.32666	321	16.9829	253	14.2711	410	17.0871	2350			Respiratory chain	Has domain(s) with predicted FAD binding, cytochrome-c oxidase activity, role in metabolic process and mitochondrial respiratory chain complex IV localization
CADANIAG00009721	ANIA_03329	VI	1030957	1035092	-1	1035092	1030957		ABC multidrug transporter (Eurofung)	protein_coding	8.58805e-11	-1.92025	2.82559e-12	TRUE	FALSE	0.970023	-0.173789	0.798058	FALSE	FALSE	Has domain(s) with predicted ATP binding, ATPase activity, ATPase activity, coupled to transmembrane movement of substances, nucleoside-triphosphatase activity, nucleotide binding activity and role in transport	0.001468	1.67974	4.76483e-05	TRUE	FALSE	55	4.68695	153	8.79285	37	4.71872	97	9.96406	20	1.41911	85	5.94762	565	29.892	327	18.4453	598	24.9222	6132			Transmembrane transport
CADANIAG00003102	ANIA_05118	V	1005379	1007107	1	1005379	1007107		putative Myb-like transcription factor (Eurofung)	protein_coding	3.94456e-07	-1.89016	2.88897e-08	TRUE	FALSE	0.952834	-0.221352	0.711882	FALSE	FALSE	Has domain(s) with predicted DNA binding, chromatin binding activity	0.014662	1.67962	0.000950145	TRUE	FALSE	7	0.596521	1	0.0574696	6	0.765197	1	0.102722	2	0.141911	7	0.489804	24	1.26975	12	0.67689	18	0.750166	6904	GO:0005575	cellular_component	Transcription factor	Has domain(s) with predicted DNA binding, chromatin binding activity
CADANIAG00009857	ANIA_03209	VI	1423234	1423869	-1	1423869	1423234		conserved hypothetical protein	protein_coding	4.50236e-21	-1.87472	3.957e-23	TRUE	FALSE	0.922137	-0.209777	0.608782	FALSE	FALSE	Putative high affinity copper transporter	4.64752e-05	1.67155	6.80917e-07	TRUE	FALSE	21	1.78956	22	1.26433	19	2.42312	15	1.54083	29	2.0577	72	5.03798	408	21.5858	181	10.2098	242	10.0856	5353			unknown	Putative high affinity copper transporter
CADANIAG00006575	ANIA_06404	I	288010	289336	-1	289336	288010		conserved hypothetical protein	protein_coding	1.2551e-13	-1.9689	2.54454e-15	TRUE	FALSE	0.802395	-0.300389	0.28544	FALSE	FALSE	Has domain(s) with predicted zinc ion binding activity	0.000146828	1.66843	2.5271e-06	TRUE	FALSE	79	6.73216	70	4.02287	41	5.22885	50	5.13612	85	6.0312	88	6.15753	423	22.3793	228	12.8609	386	16.0869	3109	GO:0005575	cellular_component	unknown	Has domain(s) with predicted zinc ion binding activity
CADANIAG00002774	ANIA_08311	V	81492	82370	-1	82370	81492		hypothetical protein	protein_coding	1.46726e-09	-1.16178	6.16661e-11	TRUE	FALSE	0.782898	0.524059	0.254931	FALSE	FALSE	protein of unknown function	0.00259622	1.66747	9.56796e-05	TRUE	FALSE	416	35.4504	409	23.5051	263	33.5411	147	15.1002	432	30.6527	411	28.7585	1361	72.0054	949	53.5307	1563	65.1394	4870	GO:0005575	cellular_component	unknown
CADANIAG00007646	ANIA_06848	I	3311634	3313396	1	3311634	3313396		MFS quinate transporter, putative (AFU_orthologue; AFUA_5G12950)	protein_coding	0.050078	-1.30584	0.0241841	FALSE	FALSE				FALSE	FALSE	Has domain(s) with predicted substrate-specific transmembrane transporter activity, transmembrane transporter activity, role in transmembrane transport and integral component of membrane, membrane localization	0.0261931	1.65414	0.00215126	TRUE	FALSE	688	58.6295	977	56.1478	413	52.6711	534	54.8537	905	64.2146	1168	81.7272	3382	178.929	3112	175.54	5365	223.591	8249			Transmembrane transport
CADANIAG00009644	ANIA_03395	VI	794404	795817	-1	795817	794404		conserved hypothetical protein	protein_coding	6.12259e-43	-1.73546	1.24176e-45	TRUE	FALSE	0.96177	-0.0802376	0.750954	FALSE	FALSE	protein of unknown function	3.21285e-09	1.6488	1.1587e-11	TRUE	FALSE	22	1.87478	60	3.44818	18	2.29559	41	4.21161	46	3.26395	42	2.93882	264	13.9673	239	13.4814	335	13.9614	5498	GO:0005575	cellular_component	Secondary metabolism
CADANIAG00009858	ANIA_03208	VI	1424258	1426307	1	1424258	1426307		ferric-chelate reductase, putative (AFU_orthologue; AFUA_6G13750)	protein_coding	3.55464e-20	-1.52216	3.56465e-22	TRUE	FALSE	0.94736	0.116302	0.680249	FALSE	FALSE	Has domain(s) with predicted oxidoreductase activity and role in oxidation-reduction process	3.03723e-07	1.63077	1.64304e-09	TRUE	FALSE	1	0.0852173	10	0.574696	2	0.255066	3	0.308167	0	0	6	0.419832	20	1.05813	16	0.90252	37	1.54201	4090	GO:0005575; GO:0016491	cellular_component; oxidoreductase activity	Iron assimilation	Has domain(s) with predicted oxidoreductase activity and role in oxidation-reduction process
CADANIAG00004796	ANIA_03903	II	2664919	2666707	1	2664919	2666707	bglH	beta-1,4-glucosidase (Eurofung)	protein_coding	0.105057	-0.868244	0.0591631	FALSE	FALSE	0.802756	0.736786	0.287787	FALSE	FALSE	Putative beta-glucosidase with a predicted role in polysaccharide degradation	0.0339594	1.59699	0.00308481	TRUE	FALSE	8	0.681738	18	1.03445	6	0.765197	6	0.616334	7	0.496687	13	0.909635	46	2.43369	31	1.74863	82	3.41742	2717	GO:0005575	cellular_component	Carbon metabolism
CADANIAG00008791	ANIA_02116	VII	2858751	2859702	1	2858751	2859702		NAD dependent epimerase/dehydratase, putative (AFU_orthologue; AFUA_7G00180)	protein_coding	0.000275807	-2.5862	5.40537e-05	TRUE	TRUE				FALSE	FALSE	Has domain(s) with predicted catalytic activity, coenzyme binding activity and role in cellular metabolic process	0.0416866	1.59424	0.00398169	TRUE	FALSE	6	0.511304	10	0.574696	3	0.382599	11	1.12995	15	1.06433	13	0.909635	122	6.45456	118	6.65609	263	10.9608	10455	GO:0005575	cellular_component	Carbon metabolism
CADANIAG00002969	ANIA_08483	V	639787	640521	1	639787	640521		conserved hypothetical protein	protein_coding	4.54813e-12	-1.71505	1.19404e-13	TRUE	FALSE	0.962407	-0.126453	0.75693	FALSE	FALSE	protein of unknown function	0.000426364	1.5812	1.0057e-05	TRUE	FALSE	6999	596.436	6953	399.586	5247	669.165	2764	283.924	7611	540.041	9487	663.824	25645	1356.78	19702	1111.34	29999	1250.23	3295	GO:0005575	cellular_component	unknown
CADANIAG00002508	ANIA_10028	VIII	4189781	4191588	1	4189781	4191588	CYP684A1	cytochrome P450, putative (Eurofung)	protein_coding	0.00161804	-1.48602	0.000423313	TRUE	FALSE	0.999611	0.116796	0.916484	FALSE	FALSE	Putative cytochrome P450	0.00637642	1.58064	0.000316198	TRUE	FALSE	59	5.02782	92	5.28721	42	5.35638	40	4.10889	61	4.32828	61	4.26829	183	9.68184	160	9.0252	203	8.4602	2763	GO:0005575; GO:0016705; GO:0020037; GO:0005506; GO:0008202; GO:0009055; GO:0016491	cellular_component; oxidoreductase activity, acting on paired donors, with incorporation or reduction of molecular oxygen; heme binding; iron ion binding; steroid metabolic process; electron carrier activity; oxidoreductase activity	Respiratory chain
CADANIAG00002389	ANIA_11267	VIII	3854301	3854636	-1	3854636	3854301		hypothetical protein	protein_coding	0.0162857	-1.10677	0.00641703	TRUE	FALSE	0.904447	0.47715	0.538706	FALSE	FALSE	protein of unknown function	0.0237655	1.57463	0.00182667	TRUE	FALSE	1716	146.233	2141	123.042	1109	141.434	1024	105.188	2638	187.18	2554	178.708	7186	380.184	4532	255.639	7744	322.738	2711	GO:0005575	cellular_component	unknown
CADANIAG00006402	ANIA_08645	III	3220504	3221893	1	3220504	3221893		Putative Zn(II)2Cys6 transcription factor (Eurofung)	protein_coding	9.12607e-05	-1.66056	1.47765e-05	TRUE	FALSE	1	-0.0736843	1	FALSE	FALSE	Ortholog(s) have role in positive regulation of secondary metabolite biosynthetic process, secondary metabolite biosynthetic process	0.00185551	1.57406	6.27358e-05	TRUE	FALSE	175	14.913	180	10.3445	155	19.7676	65	6.67695	282	20.0094	212	14.8341	689	36.4524	559	31.5318	725	30.215	7710			Secondary metabolism	Ortholog(s) have role in positive regulation of secondary metabolite biosynthetic process, secondary metabolite biosynthetic process
CADANIAG00005523	ANIA_04882	III	680356	682085	1	680356	682085	pelF	pectin lyase (Eurofung)	protein_coding	1.10276e-09	-1.69379	4.4483e-11	TRUE	FALSE	0.949805	-0.130946	0.692227	FALSE	FALSE	Putative pectin lyase involved in degradation of pectin	5.7814e-07	1.56044	3.25786e-09	TRUE	FALSE	22	1.87478	27	1.55168	18	2.29559	18	1.849	16	1.13529	14	0.979607	84	4.44413	70	3.94853	127	5.29283	7990	GO:0005575	cellular_component	Carbon metabolism
CADANIAG00001180	ANIA_09393	VIII	502348	504072	1	502348	504072		MFS transporter, putative (AFU_orthologue; AFUA_3G04000)	protein_coding	8.46712e-14	-1.96708	1.67911e-15	TRUE	FALSE	0.864051	-0.395049	0.445423	FALSE	FALSE	Ortholog(s) have fungal-type vacuole membrane localization	0.0225073	1.55687	0.00167923	TRUE	FALSE	1342	114.362	1520	87.3538	843	107.51	973	99.9488	1037	73.5807	2294	160.516	5106	270.139	3792	213.897	5952	248.055	10690			Transmembrane transport
CADANIAG00001921	ANIA_11280	VIII	2549561	2549919	-1	2549919	2549561		hypothetical protein	protein_coding	6.54791e-05	-1.42311	1.01004e-05	TRUE	FALSE	1	0.104852	0.932902	FALSE	FALSE	protein of unknown function	0.000539516	1.53814	1.34377e-05	TRUE	FALSE	485	41.3304	394	22.643	291	37.1121	420	43.1434	565	40.0898	838	58.6365	2110	111.632	1461	82.4114	2250	93.7707	393	GO:0005575	cellular_component	unknown
CADANIAG00003669	ANIA_05422	V	2605313	2606808	-1	2606808	2605313		beta-lactamase family protein (AFU_orthologue; AFUA_5G07500)	protein_coding	0.0650119	-0.812526	0.0332055	FALSE	FALSE	0.814598	0.692046	0.318807	FALSE	FALSE	Putative beta-lactamase family protein	0.00885631	1.53644	0.000495067	TRUE	FALSE	73	6.22086	76	4.36769	30	3.82599	67	6.8824	40	2.83821	101	7.06717	326	17.2474	285	16.0761	478	19.9211	6832			Oxidative stress response	protein abundance decreased by menadione stress
CADANIAG00008482	ANIA_01833	VII	1966002	1967518	1	1966002	1967518		ZIP Zinc transporter, putative (AFU_orthologue; AFUA_4G09560)	protein_coding	5.00923e-22	-1.72063	4.00739e-24	TRUE	FALSE	0.849892	-0.192458	0.405707	FALSE	FALSE	Ortholog(s) have role in pathogenesis, sequestering of zinc ion, zinc II ion transmembrane transport	1.2575e-12	1.53542	2.12584e-15	TRUE	FALSE	22	1.87478	38	2.18385	18	2.29559	22	2.25989	9	0.638598	92	6.43742	461	24.3898	313	17.6556	1021	42.5511	10411	GO:0032119	sequestering of zinc ion	Transmembrane transport
CADANIAG00009645	ANIA_03394	VI	796250	797948	1	796250	797948	CYP620D1	cytochrome P450, putative (Eurofung)	protein_coding	5.97514e-37	-1.70027	1.61581e-39	TRUE	FALSE	0.930035	-0.165646	0.629224	FALSE	FALSE	Putative cytochrome P450	0.00054195	1.53325	1.36205e-05	TRUE	FALSE	1148	97.8294	1572	90.3423	739	94.2468	970	99.6406	1165	82.663	1587	111.045	8761	463.512	5874	331.338	9478	395.004	9818	GO:0005575; GO:0016705; GO:0020037; GO:0005506; GO:0009055	cellular_component; oxidoreductase activity, acting on paired donors, with incorporation or reduction of molecular oxygen; heme binding; iron ion binding; electron carrier activity	Secondary metabolism
CADANIAG00008481	ANIA_01832	VII	1964327	1965425	-1	1965425	1964327	aspnd1	antigen 1 precursor (Eurofung)	protein_coding	4.96189e-43	-1.78606	9.50447e-46	TRUE	FALSE	0.742426	-0.262912	0.150629	FALSE	FALSE	N-glycosylated membrane protein	5.28942e-12	1.52398	1.01341e-14	TRUE	FALSE	206	17.5548	253	14.5398	146	18.6198	165	16.9492	215	15.2554	488	34.1463	4109	217.392	2796	157.715	5954	248.138	7701	GO:0032119	sequestering of zinc ion	Cell wall/Membranes
CADANIAG00003582	ANIA_05505	V	2325260	2327159	1	2325260	2327159		conserved hypothetical protein	protein_coding	5.33909e-21	-1.8774	4.8127e-23	TRUE	FALSE	0.796753	-0.33622	0.280604	FALSE	FALSE	protein of unknown function	5.82977e-11	1.52125	1.44545e-13	TRUE	FALSE	446	38.0069	602	34.5967	338	43.1061	360	36.98	420	29.8012	790	55.2778	2642	139.778	1994	112.477	3138	130.779	6609	GO:0005575	cellular_component	Development	zitiert in Transcriptional changes in the transition from vegetative cells to asexual development in the model fungus Aspergillus nidulans.
CADANIAG00005658	ANIA_04767	III	1054160	1056923	-1	1056923	1054160		conserved hypothetical protein	protein_coding	7.88096e-25	-2.02057	5.06157e-27	TRUE	TRUE	0.732639	-0.515586	0.0397145	FALSE	FALSE	protein of unknown function	4.88517e-06	1.50749	4.62475e-08	TRUE	FALSE	34	2.89739	52	2.98842	29	3.69845	15	1.54083	49	3.47681	39	2.72891	198	10.4754	155	8.74317	216	9.00199	1747	GO:0005575	cellular_component	unknown
CADANIAG00009856	ANIA_10385	VI	1421328	1422630	1	1421328	1422630		hypothetical protein	protein_coding	0.845633	-0.118372	0.784556	FALSE	FALSE	0.732639	1.34836	0.0565684	FALSE	FALSE	protein of unknown function	0.0431181	1.50291	0.00416943	TRUE	FALSE	132	11.2487	152	8.73538	92	11.733	106	10.8886	153	10.8562	178	12.455	454	24.0194	377	21.2656	639	26.6309	9517	GO:0005575	cellular_component	unknown
CADANIAG00003947	ANIA_07930	II	255644	256646	-1	256646	255644		conserved hypothetical protein	protein_coding	0.000422837	-1.59496	8.83788e-05	TRUE	FALSE	0.976552	-0.15415	0.819406	FALSE	FALSE	protein of unknown function	0.0441927	1.48646	0.0043736	TRUE	FALSE	17	1.44869	23	1.3218	4	0.510131	11	1.12995	8	0.567643	12	0.839663	40	2.11625	37	2.08708	58	2.4172	7289	GO:0005575	cellular_component	unknown
CADANIAG00005312	ANIA_05074	III	74337	75165	-1	75165	74337		conserved hypothetical protein	protein_coding	3.48108e-06	-2.03838	3.38106e-07	TRUE	TRUE	0.87359	-0.503879	0.476157	FALSE	FALSE	protein of unknown function	0.0157907	1.48615	0.00105354	TRUE	FALSE	5	0.426086	1	0.0574696	5	0.637664	7	0.719056	6	0.425732	4	0.279888	33	1.74591	18	1.01534	49	2.04212	8859	GO:0005575	cellular_component	unknown
CADANIAG00010504	ANIA_02622	VI	3307849	3308998	-1	3308998	3307849	ipnA	isopenicillin N synthetase (Eurofung)	protein_coding	3.45453e-06	-1.15226	3.34807e-07	TRUE	FALSE	0.842837	0.319006	0.388135	FALSE	FALSE	Isopenicillin-N synthase with a role in penicillin biosynthesis	0.000146828	1.46092	2.54834e-06	TRUE	FALSE	268	22.8382	250	14.3674	189	24.1037	178	18.2846	327	23.2024	774	54.1583	3699	195.7	2630	148.352	4314	179.79	9574	GO:0005575; GO:0005506	cellular_component; iron ion binding	Secondary metabolism
CADANIAG00000174	ANIA_07268	IV	482242	483024	-1	483024	482242		short chain dehydrogenase/reductase, putative (AFU_orthologue; AFUA_7G00840)	protein_coding	1.00635e-05	-1.31992	1.13959e-06	TRUE	FALSE	0.95833	0.191984	0.739126	FALSE	FALSE	Has domain(s) with predicted oxidoreductase activity and role in metabolic process	0.0367734	1.45722	0.00339427	TRUE	FALSE	59	5.02782	66	3.793	35	4.46365	76	7.8069	34	2.41248	85	5.94762	300	15.8719	228	12.8609	359	14.9616	10581	GO:0005575; GO:0016491	cellular_component; oxidoreductase activity	Other metabolic functions
CADANIAG00000179	ANIA_07263	IV	494097	495188	1	494097	495188		conserved hypothetical protein	protein_coding	4.80766e-30	-1.75255	2.16683e-32	TRUE	FALSE	0.839532	-0.289029	0.371517	FALSE	FALSE	protein of unknown function	0.000107629	1.44726	1.74671e-06	TRUE	FALSE	173	14.7426	223	12.8157	140	17.8546	109	11.1967	254	18.0227	370	25.8896	1098	58.0911	774	43.6594	1178	49.0942	4285	GO:0005575	cellular_component	unknown
CADANIAG00002307	ANIA_00392	VIII	3641251	3642797	-1	3642797	3641251		endonuclease/exonuclease/phosphatase family protein (AFU_orthologue; AFUA_1G01540)	protein_coding	3.32839e-18	-1.73392	3.87246e-20	TRUE	FALSE	0.902343	-0.276784	0.531872	FALSE	FALSE	Endo/Exonuclease family protein	0.00458687	1.44474	0.000200576	TRUE	FALSE	0	0	0	0	0	0	0	0	0	0	0	0	14	0.740688	2	0.112815	20	0.833517	10883			Nucleotide metabolism
CADANIAG00003768	ANIA_05328	V	2875485	2876767	-1	2876767	2875485		GPI anchored dioxygenase, putative (AFU_orthologue; AFUA_3G01800)	protein_coding	0.00270949	-1.31387	0.000772701	TRUE	FALSE	0.966051	0.161693	0.773106	FALSE	FALSE	Has domain(s) with predicted catalytic activity, ferric iron binding, iron ion binding, oxidoreductase activity, acting on single donors with incorporation of molecular oxygen, incorporation of two atoms of oxygen activity	0.0313442	1.44202	0.00274185	TRUE	FALSE	4	0.340869	7	0.402287	4	0.510131	2	0.205445	5	0.354777	7	0.489804	24	1.26975	16	0.90252	35	1.45866	4059	GO:0005575	cellular_component	Oxidative stress response
CADANIAG00003684	ANIA_05408	V	2640626	2641141	-1	2641141	2640626		RNAse III, putative (AFU_orthologue; AFUA_3G03050)	protein_coding	1.43271e-06	-2.38982	1.24787e-07	TRUE	TRUE	0.75246	-0.939753	0.188807	FALSE	FALSE	Has domain(s) with predicted RNA binding, ribonuclease III activity and role in RNA processing	0.00879879	1.42708	0.000489868	TRUE	FALSE	30	2.55652	110	6.32166	40	5.10131	38	3.90345	47	3.3349	57	3.9884	166	8.78244	202	11.3943	378	15.7535	3277	GO:0005575	cellular_component	other
CADANIAG00000464	ANIA_07012	IV	1322556	1324491	1	1322556	1324491		homeobox transcription factor, putative (AFU_orthologue; AFUA_4G04320)	protein_coding	5.60172e-32	-1.41273	2.14601e-34	TRUE	FALSE	1	0.00549585	0.994547	FALSE	FALSE	Has domain(s) with predicted DNA binding, sequence-specific DNA binding, transcription factor activity, sequence-specific DNA binding activity and role in regulation of transcription, DNA-templated	0.00123802	1.42646	3.82302e-05	TRUE	FALSE	5	0.426086	13	0.747105	2	0.255066	9	0.924501	3	0.212866	9	0.629748	29	1.53428	21	1.18456	49	2.04212	1465	GO:0005575	cellular_component	Transcription factor
CADANIAG00010294	ANIA_02809	VI	2699298	2700267	-1	2700267	2699298		conserved hypothetical protein	protein_coding	0.0100919	-0.923321	0.00362284	FALSE	FALSE	0.854012	0.456305	0.419765	FALSE	FALSE	protein of unknown function	0.00489269	1.41942	0.000220014	TRUE	FALSE	5	0.426086	1	0.0574696	0	0	2	0.205445	0	0	3	0.209916	14	0.740688	10	0.564075	22	0.916869	4390	GO:0005575	cellular_component	unknown
CADANIAG00004190	ANIA_08154	II	933055	934066	1	933055	934066		conserved hypothetical protein	protein_coding	3.53787e-06	-1.66395	3.4442e-07	TRUE	FALSE	0.962407	-0.213414	0.757315	FALSE	FALSE	protein of unknown function	0.000614024	1.416	1.61239e-05	TRUE	FALSE	2401	204.607	2232	128.272	1558	198.696	1144	117.514	3030	214.995	3788	265.054	10595	560.542	8105	457.183	13012	542.286	3080	GO:0005575	cellular_component	unknown
CADANIAG00003296	ANIA_05763	V	1515290	1517345	-1	1517345	1515290		MFS transporter, putative (AFU_orthologue; AFUA_6G06680)	protein_coding	8.4359e-06	-1.6717	9.33365e-07	TRUE	FALSE	0.957762	-0.224506	0.73565	FALSE	FALSE	Has domain(s) with predicted role in transmembrane transport and integral component of membrane localization	0.000130442	1.4092	2.17575e-06	TRUE	FALSE	4	0.340869	0	0	2	0.255066	3	0.308167	6	0.425732	4	0.279888	15	0.793594	14	0.789705	36	1.50033	8585			Transmembrane transport
CADANIAG00010167	ANIA_02921	VI	2338291	2339806	1	2338291	2339806		conserved hypothetical protein	protein_coding	0.000500035	-1.95758	0.000107388	TRUE	FALSE	0.902855	-0.510744	0.532788	FALSE	FALSE	protein of unknown function	0.0229983	1.40548	0.00174437	TRUE	FALSE	3	0.255652	4	0.229879	2	0.255066	1	0.102722	1	0.0709553	3	0.209916	10	0.529063	23	1.29737	9	0.375083	2880	GO:0005575	cellular_component	unknown
CADANIAG00004679	ANIA_04006	II	2301843	2303999	-1	2303999	2301843		GMC oxidoreductase (Eurofung)	protein_coding	3.11162e-18	-2.07943	3.57617e-20	TRUE	TRUE	0.732639	-0.662652	0.0487925	FALSE	FALSE	Putative glucose oxidase with a predicted role in gluconic acid and gluconate metabolism	6.46497e-06	1.39622	6.33892e-08	TRUE	FALSE	10	0.852173	10	0.574696	1	0.127533	3	0.308167	8	0.567643	5	0.34986	34	1.79881	27	1.523	31	1.29195	686			Other metabolic functions
CADANIAG00007772	ANIA_09441	I	3647108	3648850	1	3647108	3648850		choline transporter (Eurofung)	protein_coding	1.1965e-05	-1.88366	1.39131e-06	TRUE	FALSE	0.88232	-0.462314	0.491767	FALSE	FALSE	Ortholog(s) have (R)-carnitine transmembrane transporter activity, choline transmembrane transporter activity, ethanolamine transmembrane transporter activity	0.0245769	1.39514	0.00191826	TRUE	FALSE	48	4.09043	67	3.85046	21	2.67819	48	4.93067	35	2.48344	48	3.35865	172	9.09988	107	6.03561	191	7.96009	4501			Transmembrane transport
CADANIAG00009090	ANIA_02388	VII	3707604	3709886	1	3707604	3709886		endoglucanase, putative (AFU_orthologue; AFUA_2G14490)	protein_coding	4.17355e-24	-1.56006	2.82155e-26	TRUE	FALSE	0.818358	-0.174958	0.326473	FALSE	FALSE	Putative beta-1,4-endoglucanase	1.23781e-10	1.38404	3.34807e-13	TRUE	FALSE	2	0.170435	5	0.287348	1	0.127533	0	0	2	0.141911	2	0.139944	10	0.529063	5	0.282038	24	1.00022	7278	GO:0005575	cellular_component	Carbon metabolism
CADANIAG00005494	ANIA_04906	III	597284	599311	1	597284	599311		ferric-chelate reductase, putative (AFU_orthologue; AFUA_3G10820)	protein_coding	2.56857e-12	-1.55434	6.28033e-14	TRUE	FALSE	0.926636	-0.169642	0.623308	FALSE	FALSE	Ortholog(s) have endoplasmic reticulum localization	0.000393979	1.38384	9.17906e-06	TRUE	FALSE	8	0.681738	14	0.804575	9	1.1478	6	0.616334	15	1.06433	23	1.60935	79	4.17959	71	4.00493	94	3.91753	7634	GO:0016491	oxidoreductase activity	Oxidative stress response
CADANIAG00009719	ANIA_03331	VI	1024771	1025806	1	1024771	1025806		conserved hypothetical protein	protein_coding	9.33516e-07	-1.81287	7.75213e-08	TRUE	FALSE	0.852222	-0.446736	0.415336	FALSE	FALSE	Has domain(s) with predicted catalytic activity, metal ion binding, phosphoric diester hydrolase activity	0.0316923	1.37579	0.0027967	TRUE	FALSE	11	0.93739	15	0.862044	8	1.02026	10	1.02722	2	0.141911	26	1.81927	81	4.28541	48	2.70756	132	5.50121	5262	GO:0005575	cellular_component	unknown	Has domain(s) with predicted metal ion binding, phosphoric diester hydrolase activity
CADANIAG00008916	ANIA_02230	VII	3212290	3213853	-1	3213853	3212290		FAD dependent oxidoreductase superfamily (AFU_orthologue; AFUA_8G05850)	protein_coding	0.000346124	-1.69482	7.03558e-05	TRUE	FALSE	0.930806	-0.324686	0.63466	FALSE	FALSE	Has domain(s) with predicted oxidoreductase activity and role in oxidation-reduction process	0.03702	1.36428	0.00342538	TRUE	FALSE	2721	231.876	2521	144.881	1885	240.399	1295	133.025	2214	157.095	7758	542.842	36847	1949.44	25613	1444.77	31948	1331.46	9572	GO:0005575; GO:0016491	cellular_component; oxidoreductase activity	Oxidative stress response
CADANIAG00001944	ANIA_10116	VIII	2618753	2620730	-1	2620730	2618753		conserved hypothetical protein	protein_coding	1.69595e-18	-1.33068	1.91093e-20	TRUE	FALSE	0.993576	0.0329018	0.888476	FALSE	FALSE	protein of unknown function	8.35058e-07	1.3597	5.3644e-09	TRUE	FALSE	74	6.30608	118	6.78142	74	9.43743	60	6.16334	124	8.79846	125	8.74649	168	8.88825	295	16.6402	591	24.6304	8672	GO:0005575	cellular_component	unknown
CADANIAG00006437	ANIA_08610	III	3318691	3320367	1	3318691	3320367		conserved hypothetical protein	protein_coding	6.7755e-05	-1.34076	1.04973e-05	TRUE	FALSE	1	-0.0152369	0.961613	FALSE	FALSE	Has domain(s) with predicted role in transmembrane transport and integral component of membrane localization	0.00387695	1.35279	0.000159286	TRUE	FALSE	6	0.511304	24	1.37927	9	1.1478	11	1.12995	8	0.567643	14	0.979607	38	2.01044	48	2.70756	45	1.87541	3379			Transmembrane transport	Has domain(s) with predicted role in transmembrane transport and integral component of membrane localization
CADANIAG00000741	ANIA_07624	IV	2117925	2119698	1	2117925	2119698	aglB	alpha-1,4-galactosidase (Eurofung)	protein_coding	3.31639e-08	-1.05104	1.82728e-09	TRUE	FALSE	0.809944	0.305632	0.309608	FALSE	FALSE	Putative alpha-galactosidase with a predicted role in galactose and galactitol metabolism and in degradation of mannans	8.66481e-05	1.35109	1.39645e-06	TRUE	FALSE	3	0.255652	5	0.287348	5	0.637664	5	0.513612	11	0.780509	11	0.769691	43	2.27497	25	1.41019	48	2.00044	6134			Carbon metabolism
CADANIAG00007758	ANIA_06946	I	3604009	3605419	1	3604009	3605419		conserved hypothetical protein	protein_coding	3.00055e-08	-0.747199	1.60255e-09	FALSE	FALSE	0.732639	0.602103	0.0566832	FALSE	FALSE	protein of unknown function	0.00110613	1.34588	3.32849e-05	TRUE	FALSE	22	1.87478	13	0.747105	4	0.510131	7	0.719056	3	0.212866	5	0.34986	25	1.32266	22	1.24097	22	0.916869	6831	GO:0005575	cellular_component	unknown
CADANIAG00006448	ANIA_08601	III	3340545	3341496	-1	3341496	3340545		conserved hypothetical protein	protein_coding	0.0216576	-0.997022	0.00894857	FALSE	FALSE	0.952834	0.297598	0.704552	FALSE	FALSE	protein of unknown function	0.00594986	1.34024	0.000287669	TRUE	FALSE	40	3.40869	76	4.36769	41	5.22885	42	4.31434	40	2.83821	104	7.27708	217	11.4807	179	10.0969	346	14.4198	6221	GO:0005575	cellular_component	unknown
CADANIAG00007965	ANIA_08903	VII	507360	509575	1	507360	509575		MFS peptide transporter, putative (AFU_orthologue; AFUA_8G02550)	protein_coding	1.27043e-05	-1.33135	1.48873e-06	TRUE	FALSE	1	0.0061822	0.98899	FALSE	FALSE	Putative peptide transporter	0.00899807	1.33724	0.000508062	TRUE	FALSE	14	1.19304	3	0.172409	7	0.89273	10	1.02722	7	0.496687	20	1.39944	39	2.06334	41	2.31271	60	2.50055	8904			Transmembrane transport	Putative peptide transporter; transcript upregulated by nitrate limitation
CADANIAG00008834	ANIA_02157	VII	3002487	3004221	1	3002487	3004221	pepAa	extracellular aspartic endopeptidase, putative (AFU_orthologue; AFUA_2G15950)	protein_coding	1.82343e-17	-1.65866	2.32031e-19	TRUE	FALSE	0.789363	-0.326824	0.262032	FALSE	FALSE	Putative aspartic endopeptidase	0.000819269	1.33079	2.26533e-05	TRUE	FALSE	0	0	1	0.0574696	3	0.382599	1	0.102722	1	0.0709553	0	0	12	0.634875	3	0.169223	10	0.416759	11032	GO:0005575	cellular_component	Protein degradation
CADANIAG00000448	ANIA_11541	IV	1268571	1269266	-1	1269266	1268571		hypothetical protein	protein_coding	2.15884e-07	-1.68958	1.4832e-08	TRUE	FALSE	0.850237	-0.350595	0.408658	FALSE	FALSE	protein of unknown function	0.00865181	1.32933	0.000475835	TRUE	FALSE	104	8.86259	143	8.21816	90	11.478	112	11.5049	101	7.16649	175	12.2451	396	20.9509	331	18.6709	543	22.63	1061	GO:0005575	cellular_component	unknown
CADANIAG00002954	ANIA_08469	V	587106	589155	1	587106	589155		Putative Zn(II)2Cys6 transcription factor (Eurofung)	protein_coding	0.474734	-0.395396	0.372159	FALSE	FALSE	0.740171	0.916839	0.132406	FALSE	FALSE	Has domain(s) with predicted RNA polymerase II transcription factor activity, sequence-specific DNA binding, zinc ion binding activity, role in regulation of transcription, DNA-templated and nucleus localization	0.0499769	1.32135	0.00524383	TRUE	FALSE	1360	115.895	1668	95.8593	1018	129.828	1093	112.275	1529	108.491	2963	207.327	8418	445.365	5548	312.949	7651	318.862	8634			Transcription factor
CADANIAG00005707	ANIA_04722	III	1179163	1180579	1	1179163	1180579		hypothetical protein	protein_coding	9.62445e-07	-1.15939	8.03574e-08	TRUE	FALSE	0.937691	0.162168	0.652072	FALSE	FALSE	protein of unknown function	0.00137815	1.32124	4.34894e-05	TRUE	FALSE	4	0.340869	6	0.344818	1	0.127533	7	0.719056	5	0.354777	10	0.69972	29	1.53428	25	1.41019	80	3.33407	8693	GO:0005575	cellular_component	unknown	(GPI)-anchored protein
CADANIAG00007933	ANIA_11151	VII	397529	398938	1	397529	398938		conserved hypothetical protein	protein_coding	2.87368e-10	-2.11781	1.04586e-11	TRUE	TRUE	0.740171	-0.836088	0.130071	FALSE	FALSE	N2227-like protein	0.00427632	1.32006	0.000182658	TRUE	FALSE	533	45.4208	702	40.3437	304	38.77	556	57.1136	410	29.0917	820	57.377	2043	108.087	1421	80.1551	2496	104.023	6669	GO:0005575	cellular_component	Response to other stresses
CADANIAG00003769	ANIA_05327	V	2877797	2880156	1	2877797	2880156		conserved hypothetical protein	protein_coding	1.16193e-10	-1.49053	3.95383e-12	TRUE	FALSE	0.952834	-0.160549	0.710808	FALSE	FALSE	Has domain(s) with predicted GTP binding, GTPase activity	0.00466104	1.31491	0.00020592	TRUE	FALSE	25	2.13043	26	1.49421	15	1.91299	14	1.43811	37	2.62535	26	1.81927	156	8.25338	91	5.13308	160	6.66814	458	GO:0005575	cellular_component	other	Has domain(s) with predicted GTP binding, GTPase activity
CADANIAG00005788	ANIA_04643	III	1421967	1424037	1	1421967	1424037	CYP675A1	cytochrome P450, putative (Eurofung)	protein_coding	0.00792441	-1.07249	0.00271707	TRUE	FALSE	0.960893	0.219533	0.746846	FALSE	FALSE	Putative cytochrome P450	0.0172442	1.31431	0.00118399	TRUE	FALSE	2	0.170435	3	0.172409	4	0.510131	3	0.308167	8	0.567643	5	0.34986	29	1.53428	22	1.24097	42	1.75039	9256	GO:0005575; GO:0016705; GO:0020037; GO:0005506; GO:0009055	cellular_component; oxidoreductase activity, acting on paired donors, with incorporation or reduction of molecular oxygen; heme binding; iron ion binding; electron carrier activity	unknown
CADANIAG00007555	ANIA_06761	I	3031868	3033323	-1	3033323	3031868		acyl-CoA dehydrogenase, putative (AFU_orthologue; AFUA_7G06510)	protein_coding	0.0434239	-0.944742	0.0204863	FALSE	FALSE	0.883827	0.413446	0.493633	FALSE	FALSE	Putative acyl-CoA dehydrogenase	0.0496937	1.31081	0.00518611	TRUE	FALSE	276	23.52	491	28.2176	140	17.8546	300	30.8167	293	20.7899	407	28.4786	1353	71.5822	1235	69.6633	2168	90.3533	8250			Carbon metabolism
CADANIAG00003908	ANIA_07891	II	155879	157488	1	155879	157488		conserved hypothetical protein	protein_coding	1.57498e-37	-1.58057	4.08164e-40	TRUE	FALSE	0.732639	-0.309784	0.0912555	FALSE	FALSE	Putative beta-1,4-endoglucanase	2.00199e-14	1.26459	2.03064e-17	TRUE	FALSE	362	30.8486	648	37.2403	237	30.2253	476	48.8958	261	18.5193	440	30.7877	1780	94.1731	1408	79.4218	2157	89.8948	4577	GO:0005575	cellular_component	Carbon metabolism	Putative beta-1,4-endoglucanase
CADANIAG00007861	ANIA_08994	VII	194446	195387	-1	195387	194446		conserved hypothetical protein	protein_coding	8.10121e-09	-1.282	3.87945e-10	TRUE	FALSE	1	0.000233144	1	FALSE	FALSE	protein of unknown function	0.0155467	1.25946	0.00102325	TRUE	FALSE	3	0.255652	7	0.402287	3	0.382599	6	0.616334	18	1.2772	10	0.69972	42	2.22206	28	1.57941	50	2.08379	1645	GO:0005575	cellular_component	unknown
CADANIAG00007963	ANIA_11149	VII	500483	502401	-1	502401	500483		conserved hypothetical protein	protein_coding	7.50717e-07	-1.14576	6.09032e-08	TRUE	FALSE	0.970023	0.107116	0.797418	FALSE	FALSE	Has domain(s) with predicted catalytic activity, sulfuric ester hydrolase activity and role in metabolic process	0.0128949	1.23546	0.000812378	TRUE	FALSE	902	76.866	854	49.0791	554	70.6532	475	48.7931	1006	71.3811	1248	87.325	3015	159.512	2186	123.307	3445	143.573	10195	GO:0005575	cellular_component	Sulfur metabolism	Has domain(s) with predicted catalytic activity, sulfuric ester hydrolase activity and role in metabolic process
CADANIAG00009096	ANIA_02393	VII	3730233	3731177	1	3730233	3731177		short chain oxidoreductase/dehydrogenase, putative (AFU_orthologue; AFUA_1G01770)	protein_coding	0.000346271	-1.73187	7.04247e-05	TRUE	FALSE	0.935238	-0.421908	0.641787	FALSE	FALSE	putative short chain dehydrogenase	0.0301995	1.23365	0.00259348	TRUE	FALSE	2	0.170435	12	0.689636	2	0.255066	4	0.410889	8	0.567643	5	0.34986	53	2.80403	36	2.03067	65	2.70893	1539	GO:0016491	oxidoreductase activity	unknown
CADANIAG00006883	ANIA_06128	I	1164604	1166146	1	1164604	1166146		conserved hypothetical protein	protein_coding	5.24589e-09	-0.713301	2.41163e-10	FALSE	FALSE	0.732639	0.52267	0.0720993	FALSE	FALSE	Has domain(s) with predicted transferase activity, transferring hexosyl groups activity, role in carbohydrate metabolic process and membrane localization	0.000926281	1.23241	2.69697e-05	TRUE	FALSE	13	1.10782	9	0.517227	3	0.382599	2	0.205445	13	0.922419	4	0.279888	25	1.32266	29	1.63582	35	1.45866	10665			Carbon metabolism	Has domain(s) with predicted transferase activity, transferring hexosyl groups activity, role in carbohydrate metabolic process and membrane localization
CADANIAG00004696	ANIA_03992	II	2344052	2346375	1	2344052	2346375		conserved hypothetical protein	protein_coding	0.034303	-0.727149	0.0154914	FALSE	FALSE	0.836623	0.467455	0.365133	FALSE	FALSE	protein of unknown function	0.0223304	1.20794	0.00165597	TRUE	FALSE	597	50.8747	937	53.849	399	50.8856	478	49.1013	538	38.174	1084	75.8496	2880	152.37	3791	213.841	5764	240.22	6811	GO:0005575	cellular_component	unknown
CADANIAG00000389	ANIA_10885	IV	1094987	1096604	-1	1096604	1094987		conserved hypothetical protein	protein_coding	1.28508e-11	-1.34604	3.63442e-13	TRUE	FALSE	0.944058	-0.168097	0.671258	FALSE	FALSE	protein of unknown function; ANIA_10885 and ANIA_10890 were merged to ANIA_12481	0.0315218	1.18561	0.00277454	TRUE	FALSE	189	16.1061	232	13.333	130	16.5793	257	26.3996	270	19.1579	438	30.6477	1235	65.3392	806	45.4645	1137	47.3855	7496	GO:0005575	cellular_component	unknown	Genes AN10885 and AN10890 were merged (and consequently deleted) to create AN12481.
CADANIAG00010231	ANIA_02859	VI	2530595	2531638	-1	2531638	2530595		dihydrodipicolinate synthetase family protein (AFU_orthologue; AFUA_3G11920)	protein_coding	8.36675e-25	-1.3879	5.46785e-27	TRUE	FALSE	0.824563	-0.213823	0.339357	FALSE	FALSE	Has domain(s) with predicted lyase activity and role in metabolic process	1.38972e-08	1.168	5.48182e-11	TRUE	FALSE	250	21.3043	276	15.8616	217	27.6746	201	20.6472	358	25.402	412	28.8284	2732	144.54	1986	112.025	3415	142.323	7787	GO:0005575	cellular_component	Amino acid biosynthesis	Has domain(s) with predicted lyase activity and role in metabolic process
CADANIAG00004214	ANIA_08174	II	1007249	1009716	-1	1009716	1007249		hypothetical protein	protein_coding	3.69864e-14	-1.57144	7.03771e-16	TRUE	FALSE	0.782898	-0.416284	0.253416	FALSE	FALSE	protein of unknown function	0.00980853	1.16535	0.000575932	TRUE	FALSE	10	0.852173	24	1.37927	9	1.1478	6	0.616334	23	1.63197	33	2.30907	106	5.60806	50	2.82038	89	3.70915	6686	GO:0005575	cellular_component	unknown
CADANIAG00004121	ANIA_08093	II	726110	727629	1	726110	727629		CCCH zinc finger DNA binding protein (AFU_orthologue; AFUA_5G12760)	protein_coding	1.18766e-07	-2.46461	7.44975e-09	TRUE	TRUE	0.732639	-1.30747	0.033574	FALSE	FALSE	CCCH zinc finger DNA binding protein	0.045715	1.15038	0.00462181	TRUE	FALSE	53	4.51651	54	3.10336	43	5.48391	75	7.70417	71	5.03783	110	7.69691	409	21.6387	253	14.2711	425	17.7122	2221	GO:0005575	cellular_component	Transcription factor
CADANIAG00000617	ANIA_10959	IV	1740454	1742721	-1	1742721	1740454		glutaminase, putative (AFU_orthologue; AFUA_6G09910)	protein_coding	0.000101698	-1.4741	1.67185e-05	TRUE	FALSE	0.889408	-0.328295	0.511304	FALSE	FALSE	Has domain(s) with predicted catalytic activity	0.0260701	1.14513	0.00210958	TRUE	FALSE	3190	271.843	4171	239.706	1892	241.292	3418	351.105	2841	201.584	5195	363.504	12540	663.444	10526	593.746	15340	639.308	6670	GO:0005575	cellular_component	Amino acid biosynthesis
CADANIAG00002414	ANIA_00301	VIII	3920765	3922531	1	3920765	3922531		conserved hypothetical protein	protein_coding	3.32839e-18	-1.24554	3.90031e-20	TRUE	FALSE	0.952834	-0.112091	0.711736	FALSE	FALSE	protein of unknown function	0.00426117	1.13165	0.000181531	TRUE	FALSE	0	0	5	0.287348	3	0.382599	0	0	0	0	0	0	12	0.634875	10	0.564075	32	1.33363	8997	GO:0005575	cellular_component	unknown
CADANIAG00000390	ANIA_10890	IV	1096653	1097146	-1	1097146	1096653		conserved hypothetical protein	protein_coding	1.76149e-05	-1.09065	2.17531e-06	TRUE	FALSE	1	0.0135385	1	FALSE	FALSE	protein of unknown function; ANIA_10885 and ANIA_10890 were merged to ANIA_12481	0.00894139	1.11919	0.000500893	TRUE	FALSE	48	4.09043	81	4.65504	25	3.18832	55	5.64973	82	5.81834	93	6.50739	245	12.962	203	11.4507	312	13.0029	1298	GO:0005575	cellular_component	unknown	Genes AN10885 and AN10890 were merged (and consequently deleted) to create AN12481.
CADANIAG00005739	ANIA_10588	III	1296521	1297073	1	1296521	1297073		conserved hypothetical protein	protein_coding	1.33557e-09	-1.60564	5.52287e-11	TRUE	FALSE	0.733109	-0.495604	0.11714	FALSE	FALSE	protein of unknown function	0.00430459	1.11563	0.000185072	TRUE	FALSE	304	25.906	362	20.804	139	17.7271	364	37.3909	251	17.8098	450	31.4874	1218	64.4398	925	52.177	1529	63.7224	1241	GO:0005575	cellular_component	unknown
CADANIAG00005310	ANIA_05076	III	65192	67344	1	65192	67344		LysM domain protein, putative (AFU_orthologue; AFUA_5G03980)	protein_coding	4.49969e-12	-0.900389	1.16612e-13	FALSE	FALSE	0.858034	0.218941	0.429575	FALSE	FALSE	Has domain(s) with predicted role in cell wall macromolecule catabolic process	0.00120434	1.11465	3.69187e-05	TRUE	FALSE	39	3.32347	26	1.49421	15	1.91299	6	0.616334	70	4.96687	60	4.19832	241	12.7504	136	7.67142	318	13.2529	6172	GO:0005575	cellular_component	Cell wall/Membranes	Has domain(s) with predicted role in cell wall macromolecule catabolic process
CADANIAG00005189	ANIA_03557	II	3707765	3708997	-1	3708997	3707765		conserved hypothetical protein	protein_coding	0.000103657	-0.792073	1.70991e-05	FALSE	FALSE	0.790789	0.298832	0.263811	FALSE	FALSE	Has domain(s) with predicted catalytic activity and role in nucleoside metabolic process	5.97722e-05	1.09126	9.22888e-07	TRUE	FALSE	29	2.4713	42	2.41372	16	2.04053	18	1.849	73	5.17974	53	3.70851	313	16.5597	168	9.47646	397	16.5453	1550	GO:0005575	cellular_component	Nucleotide metabolism	Has domain(s) with predicted catalytic activity and role in nucleoside metabolic process
CADANIAG00009392	ANIA_09204	VI	111671	112265	-1	112265	111671	ngn6	GNAT family acetyltransferase, putative (AFU_orthologue; AFUA_4G14730)	protein_coding	0.0609593	-0.551742	0.0306893	FALSE	FALSE	0.751511	0.522334	0.181595	FALSE	FALSE	Putative GNAT-type acetyltransferase	0.0135564	1.08363	0.000860166	TRUE	FALSE	14	1.19304	17	0.976984	8	1.02026	12	1.23267	16	1.13529	23	1.60935	74	3.91506	39	2.19989	66	2.75061	4732	GO:0005575	cellular_component	unknown
CADANIAG00008872	ANIA_02189	VII	3088475	3089279	-1	3089279	3088475		hypothetical protein	protein_coding	0.0151066	-1.16214	0.00585999	TRUE	FALSE	0.963434	-0.0970696	0.761949	FALSE	FALSE	protein of unknown function	0.0495458	1.07792	0.00516341	TRUE	FALSE	13	1.10782	4	0.229879	5	0.637664	6	0.616334	23	1.63197	9	0.629748	137	7.24816	53	2.9896	185	7.71003	8165	GO:0005575	cellular_component	unknown
CADANIAG00001326	ANIA_01291	VIII	875441	876145	-1	876145	875441		DUF636 domain protein (AFU_orthologue; AFUA_1G09754)	protein_coding	9.68369e-13	-1.20424	2.24771e-14	TRUE	FALSE	0.922137	-0.12324	0.603341	FALSE	FALSE	Has domain(s) with predicted carbon-sulfur lyase activity and role in metabolic process	5.98389e-07	1.07097	3.4394e-09	TRUE	FALSE	3	0.255652	4	0.229879	2	0.255066	6	0.616334	3	0.212866	5	0.34986	90	4.76156	63	3.55367	90	3.75083	1675	GO:0005575	cellular_component	unknown	Has domain(s) with predicted carbon-sulfur lyase activity and role in metabolic process
CADANIAG00004798	ANIA_03902	II	2670440	2672448	1	2670440	2672448		conserved hypothetical protein	protein_coding	1.68159e-15	-1.43097	2.72844e-17	TRUE	FALSE	0.802756	-0.372359	0.287743	FALSE	FALSE	Has domain(s) with predicted UDP-N-acetylmuramate dehydrogenase activity, flavin adenine dinucleotide binding, oxidoreductase activity, oxidoreductase activity, acting on CH-OH group of donors activity	0.0150439	1.06427	0.000982611	TRUE	FALSE	19	1.61913	16	0.919514	14	1.78546	19	1.95172	5	0.354777	32	2.2391	113	5.97841	79	4.45619	162	6.75149	1609	GO:0005575	cellular_component	unknown	Has domain(s) with predicted UDP-N-acetylmuramate dehydrogenase activity, flavin adenine dinucleotide binding activity and role in oxidation-reduction process
CADANIAG00007661	ANIA_06861	I	3347796	3348923	1	3347796	3348923	phbB	DUF1275 domain protein (AFU_orthologue; AFUA_5G13060)	protein_coding	6.2115e-24	-1.47709	4.26931e-26	TRUE	FALSE	0.742426	-0.423177	0.15411	FALSE	FALSE	DUF1275 domain protein	0.00312573	1.05956	0.000120756	TRUE	FALSE	70	5.96521	63	3.62059	40	5.10131	52	5.34156	82	5.81834	102	7.13714	359	18.9933	288	16.2454	423	17.6289	6021	GO:0005575	cellular_component	unknown	possible prohibitin homolog
CADANIAG00002772	ANIA_08309	V	70245	71926	1	70245	71926	CYP682B11	cytochrome P450, putative (Eurofung)	protein_coding	9.08292e-11	-0.921892	3.00271e-12	FALSE	FALSE	0.902343	0.142318	0.531073	FALSE	FALSE	Putative cytochrome P450	3.31728e-05	1.05521	4.67328e-07	TRUE	FALSE	15	1.27826	47	2.70107	11	1.40286	19	1.95172	18	1.2772	34	2.37905	118	6.24294	69	3.89212	101	4.20926	4068	GO:0005575; GO:0016705; GO:0020037; GO:0005506; GO:0008202; GO:0009055; GO:0016491	cellular_component; oxidoreductase activity, acting on paired donors, with incorporation or reduction of molecular oxygen; heme binding; iron ion binding; steroid metabolic process; electron carrier activity; oxidoreductase activity	Respiratory chain
CADANIAG00010494	ANIA_02629	VI	3277400	3279402	-1	3279402	3277400		flavin-binding monooxygenase-like protein (AFU_orthologue; AFUA_6G01900)	protein_coding	2.22055e-26	-1.79142	1.22599e-28	TRUE	FALSE	0.626742	-0.732638	0.00140548	FALSE	FALSE	Pyridine nucleotide-disulphide oxidoreductase	0.000186566	1.05376	3.4483e-06	TRUE	FALSE	5	0.426086	15	0.862044	5	0.637664	5	0.513612	6	0.425732	4	0.279888	45	2.38078	34	1.91786	54	2.2505	6782	GO:0005575	cellular_component	Nucleotide metabolism
CADANIAG00007713	ANIA_06909	I	3488477	3489772	1	3488477	3489772	BEST2	conserved hypothetical protein	protein_coding	1.23006e-15	-1.60839	1.92651e-17	TRUE	FALSE	0.732639	-0.567241	0.0372003	FALSE	FALSE	Putative bestrophin-like protein	2.04353e-05	1.05363	2.56199e-07	TRUE	FALSE	145	12.3565	234	13.4479	88	11.2229	224	23.0098	179	12.701	252	17.6329	1227	64.916	716	40.3878	1102	45.9268	3244	GO:0005575	cellular_component	other	Putative bestrophin-like protein; similar to plasma membrane anion channels
CADANIAG00000825	ANIA_10985	IV	2345294	2346037	-1	2346037	2345294		conserved hypothetical protein	protein_coding	0.0320011	-0.601347	0.01425	FALSE	FALSE	0.754475	0.444122	0.193072	FALSE	FALSE	Domain of unknown function (DUF3425); ANIA_10985 and ANIA_10992 were merged to ANIA_12482	0.00764249	1.05067	0.000400663	TRUE	FALSE	1793	152.795	2789	160.283	1323	168.726	1558	160.041	1671	118.566	2311	161.705	6167	326.273	5131	289.427	7068	294.565	6608	GO:0005575	cellular_component	unknown	Genes AN10985 and AN10992 were merged (and consequently deleted) to create AN12482
CADANIAG00009703	ANIA_03345	VI	970984	973026	1	970984	973026		GABA transporter, putative (Eurofung)	protein_coding	8.67584e-26	-1.33283	5.08331e-28	TRUE	FALSE	0.778918	-0.283151	0.245546	FALSE	FALSE	Has domain(s) with predicted amino acid transmembrane transporter activity, role in amino acid transmembrane transport and membrane localization	0.000817736	1.04972	2.2487e-05	TRUE	FALSE	17	1.44869	16	0.919514	7	0.89273	7	0.719056	13	0.922419	15	1.04958	91	4.81447	50	2.82038	90	3.75083	4526			Transmembrane transport
CADANIAG00009643	ANIA_03396	VI	790404	793404	-1	793404	790404	micA	NRPS-like enzyme, putative (JCVI)	protein_coding	1.14417e-13	-0.918421	2.29479e-15	FALSE	FALSE	0.869493	0.129978	0.460931	FALSE	FALSE	Putative non-ribosomal peptide synthase (NRPS)	9.1378e-07	1.04805	6.17906e-09	TRUE	FALSE	82	6.98781	77	4.42516	61	7.7795	8	0.821779	68	4.82496	126	8.81647	465	24.6014	292	16.471	418	17.4205	1657	GO:0005575	cellular_component	Secondary metabolism
CADANIAG00006431	ANIA_08615	III	3300576	3302711	1	3300576	3302711	CYP677A1	cytochrome P450, putative (Eurofung)	protein_coding	1.16678e-16	-1.48061	1.66965e-18	TRUE	FALSE	0.732639	-0.432753	0.046579	FALSE	FALSE	Putative cytochrome P450	4.76679e-06	1.04212	4.34207e-08	TRUE	FALSE	221	18.833	303	17.4133	161	20.5328	222	22.8044	300	21.2866	371	25.9596	978	51.7423	1066	60.1304	1358	56.5958	1425	GO:0005575; GO:0016705; GO:0020037; GO:0005506; GO:0008202; GO:0009055; GO:0016491	cellular_component; oxidoreductase activity, acting on paired donors, with incorporation or reduction of molecular oxygen; heme binding; iron ion binding; steroid metabolic process; electron carrier activity; oxidoreductase activity	Respiratory chain
CADANIAG00001945	ANIA_00723	VIII	2622565	2623790	-1	2623790	2622565		hypothetical protein	protein_coding	3.21029e-08	-1.11997	1.75436e-09	TRUE	FALSE	0.963943	-0.0807052	0.766861	FALSE	FALSE	P-loop containing nucleoside triphosphate hydrolases	0.000346374	1.03726	7.57316e-06	TRUE	FALSE	0	0	0	0	2	0.255066	0	0	0	0	2	0.139944	17	0.899406	5	0.282038	68	2.83396	10454	GO:0005575	cellular_component	Nucleotide metabolism
CADANIAG00009702	ANIA_03346	VI	968549	969878	-1	969878	968549		conserved hypothetical protein	protein_coding	4.84673e-20	-1.22953	4.91499e-22	TRUE	FALSE	0.866031	-0.203771	0.453367	FALSE	FALSE	protein of unknown function	0.00764249	1.02635	0.000402236	TRUE	FALSE	155	13.2087	151	8.67791	101	12.8808	68	6.98512	159	11.2819	168	11.7553	929	49.1499	615	34.6906	963	40.1339	6779	GO:0005575	cellular_component	unknown
CADANIAG00009852	ANIA_03211	VI	1409615	1410426	1	1409615	1410426		NPP1 domain protein, putative (AFU_orthologue; AFUA_5G00600)	protein_coding	0.00891254	-0.717229	0.00312215	FALSE	FALSE	0.838676	0.310138	0.369436	FALSE	FALSE	protein of unknown function	0.0102804	1.02463	0.000614965	TRUE	FALSE	5	0.426086	3	0.172409	5	0.637664	2	0.205445	5	0.354777	2	0.139944	23	1.21684	24	1.35378	22	0.916869	4276			unknown
CADANIAG00005137	ANIA_03606	II	3573855	3574941	-1	3574941	3573855		conserved hypothetical protein	protein_coding	2.89902e-13	-1.22361	6.09443e-15	TRUE	FALSE	0.849892	-0.199035	0.406127	FALSE	FALSE	protein of unknown function	0.00405056	1.02422	0.000168906	TRUE	FALSE	11	0.93739	21	1.20686	11	1.40286	17	1.74628	15	1.06433	21	1.46941	83	4.39122	62	3.49727	198	8.25182	54	GO:0005575	cellular_component	unknown
CADANIAG00006851	ANIA_06159	I	1059226	1060752	1	1059226	1060752		diacylglycerol O-acyltransferase (DgaT), putative (AFU_orthologue; AFUA_2G08380)	protein_coding	6.28996e-08	-1.51352	3.65704e-09	TRUE	FALSE	0.732639	-0.493322	0.0650032	FALSE	FALSE	Putative 1-acylglycerol-3-phosphate acyltransferase with a predicted role in glycerolipid metabolism	1.3476e-05	1.01933	1.48839e-07	TRUE	FALSE	6	0.511304	13	0.747105	10	1.27533	10	1.02722	12	0.851464	10	0.69972	37	1.95753	44	2.48193	75	3.12569	4033	GO:0005575	cellular_component	other	Putative 1-acylglycerol-3-phosphate acyltransferase with a predicted role in glycerolipid metabolism
CADANIAG00007488	ANIA_06701	I	2847078	2848198	-1	2848198	2847078		glutamine-serine rich protein MS8, putative (AFU_orthologue; AFUA_7G05650)	protein_coding	4.68761e-11	-1.15332	1.48419e-12	TRUE	FALSE	0.944162	-0.12251	0.67444	FALSE	FALSE	protein of unknown function	0.000706326	1.01379	1.89457e-05	TRUE	FALSE	5	0.426086	21	1.20686	4	0.510131	3	0.308167	8	0.567643	7	0.489804	27	1.42847	20	1.12815	37	1.54201	6117	GO:0005575	cellular_component	unknown
CADANIAG00001885	ANIA_00778	VIII	2443156	2444220	-1	2444220	2443156		chitin binding protein, putative (AFU_orthologue; AFUA_1G14430)	protein_coding	0.00372838	-1.13542	0.00112335	TRUE	FALSE	0.983744	-0.111639	0.85413	FALSE	FALSE	Lytic polysaccharide mono-oxygenase, cellulose-degrading	0.0325442	1.008	0.00289755	TRUE	FALSE	1	0.0852173	11	0.632166	1	0.127533	6	0.616334	2	0.141911	4	0.279888	176	9.3115	84	4.73823	105	4.37597	7996	GO:0019028	viral capsid	Carbon metabolism	Has domain(s) with predicted viral capsid localization
CADANIAG00010232	ANIA_02858	VI	2532147	2533585	1	2532147	2533585		NAD binding Rossmann fold oxidoreductase, putative (AFU_orthologue; AFUA_3G11930)	protein_coding	7.79945e-13	-1.20454	1.79278e-14	TRUE	FALSE	0.872818	-0.191364	0.472436	FALSE	FALSE	Has domain(s) with predicted oxidoreductase activity	0.00054195	1.00734	1.35711e-05	TRUE	FALSE	1	0.0852173	2	0.114939	0	0	0	0	3	0.212866	1	0.069972	11	0.581969	8	0.45126	17	0.70849	1153	GO:0005575; GO:0016491	cellular_component; oxidoreductase activity	unknown	zitiert in An evolutionary conserved d-galacturonic acid metabolic pathway operates across filamentous fungi capable of pectin degradation.
	downregulated
CADANIAG00002352	ANIA_00353	VIII	3759615	3761895	-1	3761895	3759615		F-box domain protein (AFU_orthologue; AFUA_1G02120)	protein_coding	2.89196e-09	1.48258	1.28387e-10	TRUE	FALSE	0.732639	0.479194	0.0150623	FALSE	FALSE	Putative F-box protein	0.000125946	-1.00349	2.08656e-06	TRUE	FALSE	215	18.3217	170	9.76984	147	18.7473	99	10.1695	345	24.4796	222	15.5338	0	0	0	0	0	0	10344	GO:0005575	cellular_component	Protein degradation
CADANIAG00005122	ANIA_10432	II	3517788	3519705	-1	3519705	3517788		Miscellaneous Zn(II)2Cys6 transcription factor (Eurofung)	protein_coding	0.431896	0.340423	0.33123	FALSE	FALSE	0.732639	-0.679829	0.0589861	FALSE	FALSE	Has domain(s) with predicted DNA binding, zinc ion binding activity, role in transcription, DNA-templated and nucleus localization	0.0433555	-1.00875	0.00422659	TRUE	FALSE	3	0.255652	7	0.402287	3	0.382599	0	0	138	9.79184	5	0.34986	1	0.0529063	0	0	0	0	9099			Transcription factor
CADANIAG00006716	ANIA_06274	I	689248	690688	1	689248	690688		short chain dehydrogenase/reductase family (AFU_orthologue; AFUA_7G04540)	protein_coding	0.00156082	0.911868	0.000403958	FALSE	FALSE	0.961968	-0.0979578	0.756196	FALSE	FALSE	Has domain(s) with predicted oxidoreductase activity and role in metabolic process	0.0340962	-1.01044	0.0031049	TRUE	FALSE	55	4.68695	120	6.89636	46	5.86651	11	1.12995	1	0.0709553	66	4.61815	1	0.0529063	0	0	0	0	1549	GO:0016491; GO:0005575; GO:0000166	oxidoreductase activity; cellular_component; nucleotide binding	unknown
CADANIAG00009487	ANIA_09123	VI	372394	372874	-1	372874	372394		hypothetical protein	protein_coding	0.00592611	0.819873	0.00193241	FALSE	FALSE	0.905992	-0.216404	0.546307	FALSE	FALSE	protein of unknown function	0.025572	-1.01191	0.00204962	TRUE	FALSE	115	9.79998	295	16.9535	154	19.6401	57	5.85517	31	2.19962	284	19.872	1	0.0529063	2	0.112815	5	0.208379	3872	GO:0005575	cellular_component	unknown
CADANIAG00007866	ANIA_08989	VII	208083	208649	-1	208649	208083		glyoxalase family protein (AFU_orthologue; AFUA_5G14830)	protein_coding	1.18766e-07	1.07638	7.46718e-09	TRUE	FALSE	0.990224	0.0500729	0.874812	FALSE	FALSE	Glyoxalase/Bleomycin resistance protein/Dihydroxybiphenyl dioxygenase	0.000803745	-1.01578	2.18306e-05	TRUE	FALSE	2	0.170435	5	0.287348	3	0.382599	1	0.102722	9	0.638598	10	0.69972	0	0	0	0	0	0	7726	GO:0005575	cellular_component	Response to other stresses
CADANIAG00004742	ANIA_03951	II	2476810	2479297	-1	2479297	2476810		conserved hypothetical protein	protein_coding	0.0123799	0.876682	0.00461578	FALSE	FALSE	0.96177	-0.137844	0.748615	FALSE	FALSE	Member of fungal AlkB family	0.0261132	-1.01847	0.00213054	TRUE	FALSE	7	0.596521	1	0.0574696	5	0.637664	0	0	14	0.993375	3	0.209916	0	0	0	0	0	0	9306	GO:0055114; GO:0005575	oxidation-reduction process; cellular_component	Response to other stresses	Member of fungal AlkB family
CADANIAG00009041	ANIA_02343	VII	3561747	3562534	-1	3562534	3561747		nitroreductase family protein, putative (AFU_orthologue; AFUA_5G09910)	protein_coding	4.66962e-08	1.42587	2.64656e-09	TRUE	FALSE	0.732639	0.404017	0.0421599	FALSE	FALSE	Putative nitroreductase	0.000165901	-1.02185	2.97287e-06	TRUE	FALSE	10401	886.345	160	9.19514	20236	2580.76	8499	873.037	673	47.7529	957	66.9632	114	6.03131	128	7.22016	109	4.54267	5577	GO:0016491; GO:0005622	oxidoreductase activity; intracellular	Oxidative stress response
CADANIAG00005235	ANIA_03519	II	3854784	3856943	-1	3856943	3854784		conserved hypothetical protein	protein_coding	3.33897e-06	1.17232	3.20765e-07	TRUE	FALSE	0.910347	0.144196	0.568816	FALSE	FALSE	Actin-like ATPase domain protein	1.39185e-05	-1.0294	1.56863e-07	TRUE	FALSE	1	0.0852173	5	0.287348	3	0.382599	2	0.205445	38	2.6963	9	0.629748	0	0	0	0	1	0.0416759	10150	GO:0005575	cellular_component	other
CADANIAG00003271	ANIA_05781	V	1458970	1460229	1	1458970	1460229		heat-shock protein (Eurofung)	protein_coding	3.21004e-08	1.37768	1.7506e-09	TRUE	FALSE	0.740171	0.348158	0.129479	FALSE	FALSE	Putative 30 kilodalton heat shock protein	0.00245866	-1.02949	8.92243e-05	TRUE	FALSE	231	19.6852	124	7.12623	157	20.0227	46	4.72523	1145	81.2439	177	12.385	12	0.634875	15	0.846113	13	0.541786	9097	GO:0005622	intracellular	Response to other stresses
CADANIAG00005191	ANIA_03555	II	3715639	3716727	-1	3716727	3715639	hsp30	30 kDa heat shock protein (Broad)	protein_coding	4.17236e-08	1.32741	2.34122e-09	TRUE	FALSE	0.742426	0.297845	0.151947	FALSE	FALSE	Small heat-shock protein	0.00154721	-1.02953	5.09169e-05	TRUE	FALSE	29	2.4713	13	0.747105	16	2.04053	7	0.719056	187	13.2686	18	1.2595	2	0.105813	2	0.112815	3	0.125028	1796	GO:0005622	intracellular	Response to other stresses
CADANIAG00001084	ANIA_09304	VIII	231379	232146	1	231379	232146	elfA	translation elongation factor eEF-1B gamma subunit, putative (AFU_orthologue; AFUA_1G17120)	protein_coding	5.30862e-06	1.50198	5.4133e-07	TRUE	FALSE	0.732639	0.469272	0.0313117	FALSE	FALSE	Glutathione S-transferase	0.000390409	-1.03281	8.97427e-06	TRUE	FALSE	21	1.78956	19	1.09192	13	1.65793	5	0.513612	139	9.86279	13	0.909635	2	0.105813	2	0.112815	2	0.0833517	9755	GO:0005622	intracellular	Oxidative stress response	Glutathione S-transferase
CADANIAG00000143	ANIA_07295	IV	387611	389411	-1	389411	387611		MFS multidrug transporter, putative (AFU_orthologue; AFUA_2G16860)	protein_coding	2.83686e-07	1.52952	2.01058e-08	TRUE	FALSE	0.732639	0.489994	0.0218097	FALSE	FALSE	Putative transmembrane transporter	2.83969e-05	-1.03969	3.71243e-07	TRUE	FALSE	7	0.596521	38	2.18385	19	2.42312	5	0.513612	0	0	27	1.88924	0	0	1	0.0564075	0	0	8257			Transmembrane transport
CADANIAG00004010	ANIA_07990	II	421612	422254	-1	422254	421612		conserved hypothetical protein	protein_coding	0.00541935	0.97551	0.00173641	FALSE	FALSE	0.975879	-0.0808783	0.817256	FALSE	FALSE	protein of unknown function	0.0237817	-1.04084	0.0018306	TRUE	FALSE	155	13.2087	212	12.1836	104	13.2634	60	6.16334	974	69.1105	157	10.9856	19	1.00522	24	1.35378	14	0.583462	4765	GO:0005575	cellular_component	unknown
CADANIAG00006758	ANIA_06236	I	796757	803124	-1	803124	796757	sidD	putative siderophore synthetase (Eurofung)	protein_coding	5.18559e-17	1.43998	7.18679e-19	TRUE	FALSE	0.732639	0.398055	0.0195285	FALSE	FALSE	Nonribosomal peptide synthetase (NRPS)	4.29831e-05	-1.04138	6.24909e-07	TRUE	FALSE	4	0.340869	2	0.114939	8	1.02026	11	1.12995	7	0.496687	1	0.069972	0	0	0	0	1	0.0416759	2261	GO:0031177; GO:0005575	phosphopantetheine binding; cellular_component	Secondary metabolism
CADANIAG00006667	ANIA_06320	I	545821	550018	1	545821	550018	ppoB	hypothetical protein similar to fatty acid oxygenase (Eurofung)	protein_coding	2.41541e-11	1.20975	7.26666e-13	TRUE	FALSE	0.86697	0.162688	0.454637	FALSE	FALSE	Fatty acid oxygenase involved in oxylipin biosynthesis	4.04786e-06	-1.04172	3.35201e-08	TRUE	FALSE	3280	279.513	2336	134.249	2388	304.548	722	74.1655	11213	795.622	2368	165.694	220	11.6394	278	15.6813	463	19.2959	2946	GO:0055114; GO:0004601; GO:0031408; GO:0045460; GO:0005575	oxidation-reduction process; peroxidase activity; oxylipin biosynthetic process; sterigmatocystin metabolic process; cellular_component	Development
CADANIAG00009773	ANIA_03286	VI	1180399	1182167	-1	1182167	1180399		conserved hypothetical protein	protein_coding	0.599343	0.113811	0.500139	FALSE	FALSE	0.6122	-0.930501	0.000948771	FALSE	FALSE	protein of unknown function	0.00530592	-1.04701	0.000246968	TRUE	FALSE	6	0.511304	14	0.804575	5	0.637664	2	0.205445	6	0.425732	10	0.69972	0	0	0	0	1	0.0416759	9190	GO:0005575	cellular_component	unknown
CADANIAG00006054	ANIA_04403	III	2144897	2145834	1	2144897	2145834		DnaJ domain protein (AFU_orthologue; AFUA_4G06920)	protein_coding	2.78522e-07	1.12351	1.96629e-08	TRUE	FALSE	0.96931	0.0706381	0.791603	FALSE	FALSE		3.82053e-05	-1.04716	5.46836e-07	TRUE	FALSE	558	47.5512	759	43.6194	312	39.7903	129	13.2512	380	26.963	322	22.531	11	0.581969	35	1.97426	18	0.750166	9131	GO:0005575	cellular_component	Chaperone
CADANIAG00006688	ANIA_06301	I	613771	614596	-1	614596	613771		conserved hypothetical protein	protein_coding	0.00174483	0.897513	0.000464175	FALSE	FALSE	0.914843	-0.169815	0.581308	FALSE	FALSE	protein of unknown function	0.00347199	-1.04801	0.000139587	TRUE	FALSE	21	1.78956	21	1.20686	8	1.02026	8	0.821779	40	2.83821	6	0.419832	2	0.105813	0	0	2	0.0833517	10059	GO:0005575	cellular_component	unknown
CADANIAG00005359	ANIA_05033	III	222136	224118	-1	224118	222136		conserved hypothetical protein	protein_coding	0.000631836	0.956871	0.000141958	FALSE	FALSE	0.9771	-0.0891966	0.82185	FALSE	FALSE	(GPI)-anchored protein	0.00787683	-1.04921	0.000419009	TRUE	FALSE	61	5.19825	31	1.78156	30	3.82599	37	3.80073	391	27.7435	41	2.86885	7	0.370344	20	1.12815	8	0.333407	9085	GO:0005575	cellular_component	unknown	(GPI)-anchored protein
CADANIAG00007826	ANIA_09027	VII	94622	95897	1	94622	95897		conserved hypothetical protein	protein_coding	3.76233e-06	1.58817	3.71358e-07	TRUE	FALSE	0.732639	0.541305	0.106784	FALSE	FALSE	protein of unknown function	0.0401986	-1.05102	0.00378291	TRUE	FALSE	69	5.87999	91	5.22974	52	6.63171	20	2.05445	136	9.64993	68	4.75809	7	0.370344	3	0.169223	8	0.333407	3906	GO:0005575	cellular_component	unknown
CADANIAG00005741	ANIA_04691	III	1302441	1303727	-1	1303727	1302441	arbD	hypothetical protein similar to D-arabinitol dehydrogenase (Eurofung)	protein_coding	3.61731e-15	1.17959	6.15453e-17	TRUE	FALSE	0.952273	0.119367	0.702126	FALSE	FALSE	Ortholog(s) have L-arabinitol 2-dehydrogenase activity and role in D-arabinose catabolic process, D-arabitol catabolic process to xylulose 5-phosphate	0.00989875	-1.05177	0.000582345	TRUE	FALSE	6	0.511304	21	1.20686	14	1.78546	7	0.719056	4	0.283821	25	1.7493	1	0.0529063	1	0.0564075	1	0.0416759	5231	GO:0005575; GO:0000166	cellular_component; nucleotide binding	Carbon metabolism
CADANIAG00010122	ANIA_02960	VI	2193116	2194467	-1	2194467	2193116		alpha-ketoglutarate-dependent taurine dioxygenase (AFU_orthologue; AFUA_3G07960)	protein_coding	0.000111114	1.10912	1.85669e-05	TRUE	FALSE	0.992717	0.0521948	0.886256	FALSE	FALSE	Has domain(s) with predicted oxidoreductase activity and role in oxidation-reduction process	0.0198321	-1.05276	0.00141035	TRUE	FALSE	641	54.6243	710	40.8034	463	59.0477	206	21.1608	1227	87.0622	520	36.3854	41	2.16916	89	5.02027	48	2.00044	5064	GO:0016491; GO:0055114; GO:0005575	oxidoreductase activity; oxidation-reduction process; cellular_component	Sulfur metabolism
CADANIAG00009774	ANIA_03285	VI	1184118	1185510	1	1184118	1185510		integral membrane protein (AFU_orthologue; AFUA_4G01270)	protein_coding	0.00888524	0.851734	0.00311059	FALSE	FALSE	0.904447	-0.216014	0.537795	FALSE	FALSE	protein of unknown function	0.0261931	-1.05323	0.00214979	TRUE	FALSE	15	1.27826	27	1.55168	12	1.53039	4	0.410889	92	6.52789	78	5.45781	3	0.158719	6	0.338445	7	0.291731	4069	GO:0005575	cellular_component	unknown
CADANIAG00005332	ANIA_05056	III	135114	135684	-1	135684	135114		conserved hypothetical protein	protein_coding	2.41231e-12	0.845942	5.81673e-14	FALSE	FALSE	0.795292	-0.211892	0.274569	FALSE	FALSE	Homologous to ccg-1 from N. crassa	3.57147e-07	-1.05434	1.9723e-09	TRUE	FALSE	56	4.77217	39	2.24132	36	4.59118	8	0.821779	300	21.2866	37	2.58896	14	0.740688	7	0.394853	12	0.50011	9756	GO:0005575	cellular_component	Development	Homologous to ccg-1 from N. crassa
CADANIAG00001773	ANIA_00884	VIII	2125591	2126796	1	2125591	2126796		conserved hypothetical protein	protein_coding	9.01035e-16	1.3009	1.39089e-17	TRUE	FALSE	0.779678	0.24146	0.247794	FALSE	FALSE	protein of unknown function	3.12104e-05	-1.0564	4.25612e-07	TRUE	FALSE	110	9.3739	48	2.75854	46	5.86651	19	1.95172	372	26.3954	89	6.2275	7	0.370344	25	1.41019	14	0.583462	962	GO:0005575	cellular_component	unknown
CADANIAG00000307	ANIA_07150	IV	851973	853793	-1	853793	851973		GABA transporter, putative (Eurofung)	protein_coding	4.79429e-15	1.15295	8.26508e-17	TRUE	FALSE	0.924913	0.0962543	0.617103	FALSE	FALSE	Amino acid transporter	2.61177e-05	-1.05695	3.3659e-07	TRUE	FALSE	8	0.681738	8	0.459757	2	0.255066	6	0.616334	20	1.41911	4	0.279888	1	0.0529063	1	0.0564075	1	0.0416759	6398			Transmembrane transport
CADANIAG00009822	ANIA_03239	VI	1319351	1320827	-1	1320827	1319351		thermophilic desulfurizing enzyme family protein (AFU_orthologue; AFUA_8G01010)	protein_coding	1.08826e-17	1.30818	1.36109e-19	TRUE	FALSE	0.788654	0.241019	0.261344	FALSE	FALSE	Has domain(s) with predicted acyl-CoA dehydrogenase activity, oxidoreductase activity, oxidoreductase activity, acting on the CH-CH group of donors activity and role in oxidation-reduction process	0.000441969	-1.06618	1.05598e-05	TRUE	FALSE	10	0.852173	23	1.3218	4	0.510131	7	0.719056	30	2.12866	1	0.069972	2	0.105813	0	0	2	0.0833517	6119	GO:0055114; GO:0005575	oxidation-reduction process; cellular_component	Sulfur metabolism
CADANIAG00001800	ANIA_00858	VIII	2199255	2202331	1	2199255	2202331	hsp104	heat shock protein (Eurofung)	protein_coding	2.31561e-09	1.47798	9.96692e-11	TRUE	FALSE	0.732639	0.411698	0.0769686	FALSE	FALSE	Putative chaperone	0.000830096	-1.06626	2.32011e-05	TRUE	FALSE	2	0.170435	6	0.344818	1	0.127533	3	0.308167	16	1.13529	2	0.139944	0	0	1	0.0564075	1	0.0416759	1443			Chaperone
CADANIAG00010134	ANIA_02950	VI	2236980	2237894	1	2236980	2237894		hypothetical protein	protein_coding	4.30634e-13	1.36493	9.31626e-15	TRUE	FALSE	0.754425	0.291671	0.191295	FALSE	FALSE	protein of unknown function	0.00140372	-1.06927	4.46127e-05	TRUE	FALSE	20	1.70435	21	1.20686	23	2.93326	4	0.410889	158	11.2109	20	1.39944	8	0.42325	4	0.22563	8	0.333407	896	GO:0005575	cellular_component	unknown
CADANIAG00008910	ANIA_02225	VII	3194592	3195845	1	3194592	3195845		nucleoside-diphosphate-sugar epimerase, putative (AFU_orthologue; AFUA_5G07170)	protein_coding	1.93667e-14	1.44267	3.57875e-16	TRUE	FALSE	0.732639	0.363223	0.0923013	FALSE	FALSE	Has domain(s) with predicted NAD binding, oxidoreductase activity, acting on the aldehyde or oxo group of donors, NAD or NADP as acceptor activity and role in cellular amino acid metabolic process, oxidation-reduction process	2.71564e-06	-1.07962	2.08118e-08	TRUE	FALSE	6	0.511304	28	1.60915	4	0.510131	1	0.102722	10	0.709553	9	0.629748	1	0.0529063	0	0	1	0.0416759	2925	GO:0055114	oxidation-reduction process	Carbon metabolism
CADANIAG00010188	ANIA_02901	VI	2402110	2403622	-1	2403622	2402110	agaA	arginase (Eurofung)	protein_coding	5.79812e-08	1.02064	3.35148e-09	TRUE	FALSE	0.957762	-0.0827853	0.726258	FALSE	FALSE	arginase, putative	4.87008e-06	-1.09486	4.55558e-08	TRUE	FALSE	338	28.8034	264	15.172	266	33.9237	68	6.98512	1027	72.8711	170	11.8952	49	2.59241	56	3.15882	61	2.54223	8503			Amino acid biosynthesis
CADANIAG00006939	ANIA_06078	I	1324924	1326019	1	1324924	1326019	nadA	hypothetical protein similar to adenine deaminase (Eurofung)	protein_coding	0.102041	0.473099	0.0571776	FALSE	FALSE	0.732639	-0.636862	0.10508	FALSE	FALSE	Adenine deaminase with a role in nucleotide salvage pathways	0.04256	-1.09593	0.00408668	TRUE	FALSE	81	6.9026	90	5.17227	59	7.52444	13	1.33539	252	17.8807	23	1.60935	7	0.370344	15	0.846113	17	0.70849	4297			Nucleotide metabolism
CADANIAG00006487	ANIA_06477	I	24752	26659	-1	26659	24752		MFS multidrug transporter, putative (AFU_orthologue; AFUA_1G01930)	protein_coding	4.65567e-14	1.61137	9.03398e-16	TRUE	FALSE	0.732639	0.508697	0.0753327	FALSE	FALSE	MFS general substrate transporter	0.00902114	-1.09754	0.000511398	TRUE	FALSE	99	8.43651	188	10.8043	74	9.43743	46	4.72523	255	18.0936	92	6.43742	8	0.42325	22	1.24097	27	1.12525	487			Transmembrane transport
CADANIAG00009653	ANIA_03387	VI	825230	826781	1	825230	826781	gprD	integral membrane protein (AFU_orthologue; AFUA_2G12640)	protein_coding	1.38882e-10	1.28505	4.74155e-12	TRUE	FALSE	0.841091	0.184434	0.37578	FALSE	FALSE	Putative G-protein coupled receptor	0.000146828	-1.09764	2.54433e-06	TRUE	FALSE	198	16.873	165	9.48249	155	19.7676	67	6.8824	274	19.4418	119	8.32666	19	1.00522	25	1.41019	24	1.00022	10727	GO:0005575	cellular_component	Development	Putative G-protein coupled receptor
CADANIAG00000164	ANIA_10920	IV	447425	449191	1	447425	449191		conserved hypothetical protein	protein_coding	0.202266	0.564028	0.132003	FALSE	FALSE	0.742234	-0.549614	0.141334	FALSE	FALSE	Has domain(s) with predicted role in transmembrane transport and integral component of membrane localization	0.0441639	-1.11304	0.0043585	TRUE	FALSE	20	1.70435	42	2.41372	12	1.53039	11	1.12995	75	5.32165	25	1.7493	8	0.42325	7	0.394853	1	0.0416759	6819			Transmembrane transport	Has domain(s) with predicted role in transmembrane transport and integral component of membrane localization
CADANIAG00002996	ANIA_11670	V	709922	710237	-1	710237	709922		conserved hypothetical protein	protein_coding	3.27636e-05	1.16207	4.52969e-06	TRUE	FALSE	0.975472	0.0484921	0.814351	FALSE	FALSE	protein of unknown function	0.00271102	-1.11468	0.000102966	TRUE	FALSE	13	1.10782	38	2.18385	13	1.65793	39	4.00617	89	6.31503	18	1.2595	6	0.317438	13	0.733298	6	0.250055	10270	GO:0005575	cellular_component	unknown
CADANIAG00000898	ANIA_07761	IV	2566246	2569107	-1	2569107	2566246		conserved hypothetical protein	protein_coding	0.12577	0.643267	0.0735488	FALSE	FALSE	0.751511	-0.486836	0.178184	FALSE	FALSE	protein of unknown function	0.015383	-1.1147	0.001009	TRUE	FALSE	8	0.681738	5	0.287348	8	1.02026	2	0.205445	19	1.34815	12	0.839663	1	0.0529063	4	0.22563	0	0	4491	GO:0005575	cellular_component	unknown
CADANIAG00006083	ANIA_04375	III	2221499	2222705	1	2221499	2222705		hypothetical protein	protein_coding	3.13587e-07	1.17198	2.25076e-08	TRUE	FALSE	0.999296	0.045611	0.908732	FALSE	FALSE	protein of unknown function	0.00315801	-1.11663	0.00012279	TRUE	FALSE	4	0.340869	0	0	3	0.382599	3	0.308167	12	0.851464	2	0.139944	1	0.0529063	0	0	2	0.0833517	7353	GO:0005575	cellular_component	unknown
CADANIAG00002569	ANIA_11261	VIII	4337638	4337943	-1	4337943	4337638		hypothetical protein	protein_coding	0.0623582	0.818933	0.0315409	FALSE	FALSE	0.875204	-0.294801	0.479766	FALSE	FALSE	protein of unknown function	0.0478778	-1.11726	0.00491566	TRUE	FALSE	20	1.70435	33	1.8965	18	2.29559	18	1.849	50	3.54777	17	1.18952	3	0.158719	6	0.338445	8	0.333407	6775	GO:0005575	cellular_component	unknown
CADANIAG00000168	ANIA_07274	IV	464785	466391	-1	466391	464785		FAD binding domain protein (AFU_orthologue; AFUA_6G12070)	protein_coding	5.50459e-17	1.24292	7.69092e-19	TRUE	FALSE	0.919763	0.119306	0.598046	FALSE	FALSE	Ortholog(s) have role in fumiquinazoline C biosynthetic process, secondary metabolite biosynthetic process and fungal-type cell wall localization	7.59753e-05	-1.12532	1.19875e-06	TRUE	FALSE	9	0.766955	14	0.804575	4	0.510131	7	0.719056	15	1.06433	9	0.629748	2	0.105813	1	0.0564075	3	0.125028	6193	GO:0055114; GO:0005575	oxidation-reduction process; cellular_component	Secondary metabolism	Ortholog(s) have role in fumiquinazoline C biosynthetic process, secondary metabolite biosynthetic process and fungal-type cell wall localization
CADANIAG00009925	ANIA_10357	VI	1621032	1622415	1	1621032	1622415		P-type ATPase, putative (Eurofung)	protein_coding	3.48793e-07	1.17738	2.51524e-08	TRUE	FALSE	0.999237	0.0411675	0.907468	FALSE	FALSE	protein of unknown function	0.000271236	-1.12796	5.56144e-06	TRUE	FALSE	135	11.5043	100	5.74696	89	11.3504	39	4.00617	271	19.2289	100	6.9972	28	1.48138	18	1.01534	35	1.45866	2448	GO:0005575	cellular_component	unknown
CADANIAG00004166	ANIA_08132	II	852353	853208	1	852353	853208		conserved hypothetical protein	protein_coding	4.61432e-05	1.24123	6.759e-06	TRUE	FALSE	0.967247	0.101135	0.779926	FALSE	FALSE	Has domain(s) with predicted metallopeptidase activity, zinc ion binding activity and role in proteolysis	0.0261132	-1.13003	0.00213073	TRUE	FALSE	1	0.0852173	19	1.09192	1	0.127533	5	0.513612	22	1.56102	9	0.629748	4	0.211625	0	0	3	0.125028	7614	GO:0005575	cellular_component	unknown	Has domain(s) with predicted metallopeptidase activity, zinc ion binding activity and role in proteolysis
CADANIAG00007719	ANIA_06915	I	3498244	3500261	1	3498244	3500261		thioredoxin, putative (AFU_orthologue; AFUA_5G13640)	protein_coding	2.77514e-09	1.62546	1.22575e-10	TRUE	FALSE	0.732639	0.49383	0.026091	FALSE	FALSE	Has domain(s) with predicted role in cell redox homeostasis	0.00034955	-1.13136	7.72421e-06	TRUE	FALSE	407	34.6834	349	20.0569	273	34.8165	101	10.375	1249	88.6232	215	15.044	97	5.13191	104	5.86638	98	4.08423	8502	GO:0005575	cellular_component	Oxidative stress response
CADANIAG00001762	ANIA_00895	VIII	2083803	2085063	-1	2085063	2083803		hypothetical oxidoreductase (Eurofung)	protein_coding	1.03182e-10	1.43696	3.45296e-12	TRUE	FALSE	0.751511	0.303717	0.186481	FALSE	FALSE	Predicted NAD-dependent oxidoreductase	0.000715041	-1.13309	1.92601e-05	TRUE	FALSE	17	1.44869	21	1.20686	21	2.67819	8	0.821779	9	0.638598	19	1.32947	1	0.0529063	3	0.169223	4	0.166703	10782	GO:0016491; GO:0055114; GO:0005622; GO:0000166	oxidoreductase activity; oxidation-reduction process; intracellular; nucleotide binding	Oxidative stress response
CADANIAG00005595	ANIA_11233	III	879495	881834	1	879495	881834		class V chitinase, putative (AFU_orthologue; AFUA_3G07160)	protein_coding	0.000625562	1.01234	0.000140055	TRUE	FALSE	0.947725	-0.125583	0.681349	FALSE	FALSE	Has domain(s) with predicted catalytic activity, chitin binding, chitinase activity, hydrolase activity, hydrolyzing O-glycosyl compounds activity and role in carbohydrate metabolic process, chitin catabolic process	0.00314414	-1.13412	0.000121896	TRUE	FALSE	3	0.255652	12	0.689636	5	0.637664	3	0.308167	9	0.638598	10	0.69972	3	0.158719	0	0	2	0.0833517	136			Other metabolic functions
CADANIAG00002700	ANIA_00054	VIII	4683790	4685771	1	4683790	4685771	afeA	hypothetical protein similar to adenylate-forming enzyme (Broad)	protein_coding	4.78361e-35	1.49021	1.50919e-37	TRUE	FALSE	0.733109	0.353567	0.115254	FALSE	FALSE	Putative adenylate-forming enzyme	1.23163e-05	-1.13938	1.27702e-07	TRUE	FALSE	75	6.39129	76	4.36769	52	6.63171	11	1.12995	177	12.5591	50	3.4986	17	0.899406	21	1.18456	15	0.625138	2799	GO:0005575	cellular_component	other
CADANIAG00003131	ANIA_10641	V	1074889	1075668	1	1074889	1075668		DSBA-like thioredoxin domain protein (AFU_orthologue; AFUA_7G06250)	protein_coding	5.31245e-09	1.74819	2.44821e-10	TRUE	FALSE	0.732639	0.6016	0.0669011	FALSE	FALSE	Has domain(s) with predicted protein disulfide oxidoreductase activity	0.0136199	-1.14588	0.000865728	TRUE	FALSE	14	1.19304	20	1.14939	16	2.04053	9	0.924501	127	9.01133	26	1.81927	9	0.476156	11	0.620483	18	0.750166	7661	GO:0005575	cellular_component	Oxidative stress response
CADANIAG00000982	ANIA_07837	IV	2767850	2769444	1	2767850	2769444		PKS-like enzyme, putative (JCVI)	protein_coding	3.99994e-07	1.04691	2.93854e-08	TRUE	FALSE	0.938726	-0.111994	0.656232	FALSE	FALSE	The genes AN7838 and AN7837 have been replaced by AN12330 and AN12331. Only AN12330 was identified in this study to be regulated.	0.000569449	-1.14972	1.45683e-05	TRUE	FALSE	77	6.56173	64	3.67806	46	5.86651	33	3.38984	97	6.88267	45	3.14874	8	0.42325	24	1.35378	9	0.375083	1717			Secondary metabolism	ORF, Deleted
CADANIAG00007453	ANIA_06668	I	2732695	2733870	-1	2733870	2732695		conserved hypothetical protein	protein_coding	0.0200787	1.66889	0.0081989	TRUE	FALSE	0.853909	0.527996	0.417436	FALSE	FALSE	NmrA-like family domain protein	0.0330803	-1.14981	0.00297575	TRUE	FALSE	3	0.255652	8	0.459757	0	0	12	1.23267	6	0.425732	9	0.629748	2	0.105813	1	0.0564075	4	0.166703	4007	GO:0005575; GO:0000166	cellular_component; nucleotide binding	unknown
CADANIAG00007215	ANIA_05831	I	2112907	2114136	-1	2114136	2112907		glutathione S-transferase (Eurofung)	protein_coding	4.64048e-10	1.79809	1.74116e-11	TRUE	FALSE	0.732639	0.646927	0.00599812	FALSE	FALSE	Predicted glutathione S-transferase	0.003347	-1.15043	0.000133156	TRUE	FALSE	121	10.3113	115	6.60901	97	12.3707	30	3.08167	461	32.7104	97	6.78728	37	1.95753	45	2.53834	64	2.66726	9695	GO:0005575	cellular_component	Oxidative stress response
CADANIAG00009863	ANIA_03203	VI	1442948	1444133	-1	1444133	1442948		F-box domain protein (AFU_orthologue; AFUA_2G14640)	protein_coding	1.91978e-05	1.10454	2.40107e-06	TRUE	FALSE	1	-0.0379206	0.951315	FALSE	FALSE	Putative F-box protein	0.0498856	-1.15349	0.00522352	TRUE	FALSE	115	9.79998	226	12.9881	72	9.18237	85	8.7314	150	10.6433	109	7.62694	16	0.8465	42	2.36912	35	1.45866	5039	GO:0005575	cellular_component	Protein degradation
CADANIAG00008237	ANIA_09444	VII	1263263	1264790	-1	1264790	1263263		conserved hypothetical protein	protein_coding	5.46975e-06	1.29513	5.59786e-07	TRUE	FALSE	0.952834	0.124286	0.707362	FALSE	FALSE	protein of unknown function	0.00434639	-1.16182	0.00018859	TRUE	FALSE	45	3.83478	43	2.47119	31	3.95352	25	2.56806	120	8.51464	38	2.65893	14	0.740688	15	0.846113	19	0.791841	3454	GO:0005575	cellular_component	unknown
CADANIAG00001009	ANIA_09243	VIII	38229	41558	-1	41558	38229		NRPS-like enzyme, putative (JCVI)	protein_coding	0.00199069	1.61141	0.000542365	TRUE	FALSE	0.854012	0.436243	0.420629	FALSE	FALSE	Has domain(s) with predicted catalytic activity and role in metabolic process	0.00980853	-1.16362	0.000574713	TRUE	FALSE	15	1.27826	35	2.01144	13	1.65793	38	3.90345	13	0.922419	10	0.69972	6	0.317438	5	0.282038	8	0.333407	9041	GO:0005575	cellular_component	Secondary metabolism
CADANIAG00006441	ANIA_11624	III	3326222	3326576	1	3326222	3326576		conserved hypothetical protein	protein_coding	2.32126e-06	1.20231	2.12902e-07	TRUE	FALSE	0.993852	0.0364883	0.889908	FALSE	FALSE	protein of unknown function	0.000634253	-1.16505	1.67981e-05	TRUE	FALSE	62	5.28347	93	5.34468	44	5.61145	41	4.21161	224	15.894	48	3.35865	16	0.8465	33	1.86145	35	1.45866	9276	GO:0005575	cellular_component	unknown
CADANIAG00006411	ANIA_08636	III	3244146	3246421	1	3244146	3246421		Putative Zn(II)2Cys6 transcription factor (Eurofung)	protein_coding	5.72489e-06	1.19443	5.92163e-07	TRUE	FALSE	0.998619	0.0292901	0.904661	FALSE	FALSE	Has domain(s) with predicted DNA binding, RNA polymerase II transcription factor activity, sequence-specific DNA binding, zinc ion binding activity and role in regulation of transcription, DNA-emplated, transcription, DNA-templated	7.7024e-08	-1.16536	3.38548e-10	TRUE	FALSE	53	4.51651	59	3.39071	78	9.94756	30	3.08167	379	26.8921	66	4.61815	34	1.79881	45	2.53834	45	1.87541	7154			Transcription factor
CADANIAG00009129	ANIA_02421	VII	3823675	3824958	1	3823675	3824958	flbC	FlbC, C2H2 finger domain transcription factor (Eurofung)	protein_coding	8.31091e-09	1.36543	3.98924e-10	TRUE	FALSE	0.913089	0.188046	0.575666	FALSE	FALSE	Putative C2H2 zinc finger transcription factor	0.0217541	-1.16939	0.00159852	TRUE	FALSE	556	47.3808	1173	67.4119	458	58.4101	275	28.2486	1193	84.6497	603	42.1931	95	5.02609	280	15.7941	200	8.33517	8884			Development
CADANIAG00003909	ANIA_07892	II	157720	158714	-1	158714	157720		conserved hypothetical protein	protein_coding	6.08876e-09	1.45412	2.83342e-10	TRUE	FALSE	0.751962	0.281447	0.188452	FALSE	FALSE	Small heat-shock protein	0.000217237	-1.17265	4.13762e-06	TRUE	FALSE	17	1.44869	21	1.20686	11	1.40286	8	0.821779	30	2.12866	18	1.2595	3	0.158719	11	0.620483	1	0.0416759	6177	GO:0005575	cellular_component	Response to other stresses	Small heat-shock protein
CADANIAG00005268	ANIA_03489	II	3947061	3950217	-1	3950217	3947061		conserved hypothetical protein	protein_coding	0.00272345	1.30509	0.000777603	TRUE	FALSE	0.958277	0.127285	0.738754	FALSE	FALSE	Ortholog(s) have endoplasmic reticulum localization	0.0337966	-1.178	0.00306237	TRUE	FALSE	241	20.5374	292	16.7811	148	18.8749	139	14.2784	474	33.6328	130	9.09635	69	3.65053	80	4.5126	65	2.70893	8656			unknown
CADANIAG00005234	ANIA_03520	II	3849952	3851926	-1	3851926	3849952		conserved hypothetical protein	protein_coding	2.20071e-12	1.16357	5.20732e-14	TRUE	FALSE	0.999349	-0.0230142	0.911869	FALSE	FALSE	protein of unknown function	2.9914e-08	-1.18678	1.28111e-10	TRUE	FALSE	13	1.10782	35	2.01144	16	2.04053	16	1.64356	43	3.05108	20	1.39944	6	0.317438	14	0.789705	2	0.0833517	27	GO:0005575	cellular_component	unknown
CADANIAG00002073	ANIA_00601	VIII	2972732	2974788	-1	2974788	2972732		conserved hypothetical protein	protein_coding	0.00671296	0.981091	0.00224345	FALSE	FALSE	0.910992	-0.238099	0.572865	FALSE	FALSE	Has domain(s) with predicted role in transmembrane transport and integral component of membrane localization	0.0113376	-1.19266	0.000700217	TRUE	FALSE	33	2.81217	69	3.9654	31	3.95352	17	1.74628	9	0.638598	67	4.68812	10	0.529063	10	0.564075	7	0.291731	10218			Transmembrane transport	Has domain(s) with predicted role in transmembrane transport and integral component of membrane localization
CADANIAG00004830	ANIA_03873	II	2759890	2761403	-1	2761403	2759890		zinc-containing alcohol dehydrogenase, putative (AFU_orthologue; AFUA_4G08240)	protein_coding	1.96388e-05	1.20772	2.47394e-06	TRUE	FALSE	1	0.0136085	0.972089	FALSE	FALSE	Putative zinc-binding oxidoreductase	0.021296	-1.19421	0.00155766	TRUE	FALSE	26	2.21565	10	0.574696	56	7.14184	27	2.7735	14	0.993375	5	0.34986	5	0.264531	3	0.169223	8	0.333407	7399	GO:0016491; GO:0055114; GO:0000166	oxidoreductase activity; oxidation-reduction process; nucleotide binding	Carbon metabolism
CADANIAG00002379	ANIA_00330	VIII	3825899	3827207	1	3825899	3827207		indoleamine 2,3-dioxygenase pyrrole 2,3-dioxygenase) (AFU_orthologue; AFUA_5G01450)	protein_coding	1.01997e-05	1.5659	1.16076e-06	TRUE	FALSE	0.740665	0.366496	0.136189	FALSE	FALSE	NADH:flavin oxidoreductase	0.000188743	-1.1996	3.53096e-06	TRUE	FALSE	273	23.2643	366	21.0339	170	21.6806	235	24.1397	627	44.489	243	17.0032	63	3.33309	164	9.25083	110	4.58434	10105	GO:0016491; GO:0055114; GO:0005575	oxidoreductase activity; oxidation-reduction process; cellular_component	unknown
CADANIAG00002787	ANIA_08324	V	125858	127793	1	125858	127793		conserved hypothetical protein	protein_coding	0.00900187	1.18332	0.00316359	TRUE	FALSE	1	-0.0357728	0.939229	FALSE	FALSE	Has domain(s) with predicted oxidoreductase activity and role in metabolic process	0.00581882	-1.21038	0.00027843	TRUE	FALSE	6	0.511304	7	0.402287	4	0.510131	5	0.513612	39	2.76726	6	0.419832	4	0.211625	4	0.22563	7	0.291731	10930	GO:0016491; GO:0005575; GO:0000166	oxidoreductase activity; cellular_component; nucleotide binding	unknown	Has domain(s) with predicted oxidoreductase activity and role in metabolic process
CADANIAG00003779	ANIA_05317	V	2909331	2910255	1	2909331	2910255		NmrA-like family protein (AFU_orthologue; AFUA_6G00280)	protein_coding	2.40197e-06	1.68944	2.20846e-07	TRUE	FALSE	0.732639	0.468851	0.0580585	FALSE	FALSE	NmrA-like family domain protein	0.00312183	-1.22234	0.000119976	TRUE	FALSE	93	7.9252	183	10.5169	74	9.43743	125	12.8403	150	10.6433	83	5.80767	24	1.26975	42	2.36912	54	2.2505	10571	GO:0005575; GO:0000166	cellular_component; nucleotide binding	unknown
CADANIAG00003012	ANIA_08523	V	747049	748207	1	747049	748207		conserved hypothetical protein	protein_coding	0.160902	0.787129	0.0996232	FALSE	FALSE	0.901859	-0.407576	0.527717	FALSE	FALSE	protein of unknown function	0.0452155	-1.22267	0.00456588	TRUE	FALSE	38	3.23826	43	2.47119	18	2.29559	29	2.97895	41	2.90917	15	1.04958	5	0.264531	13	0.733298	10	0.416759	6218	GO:0005575	cellular_component	unknown
CADANIAG00006540	ANIA_06437	I	185271	186313	-1	186313	185271		conserved hypothetical protein	protein_coding	1.96304e-05	1.72098	2.46846e-06	TRUE	FALSE	0.809944	0.486821	0.307468	FALSE	FALSE	protein of unknown function	0.046152	-1.22546	0.00469167	TRUE	FALSE	2	0.170435	12	0.689636	2	0.255066	3	0.308167	12	0.851464	17	1.18952	0	0	5	0.282038	5	0.208379	7954	GO:0005575	cellular_component	unknown
CADANIAG00009089	ANIA_02387	VII	3705107	3706848	1	3705107	3706848		conserved hypothetical protein	protein_coding	0.0016057	1.24115	0.000419563	TRUE	FALSE	1	-0.00626552	0.981574	FALSE	FALSE	Has domain(s) with predicted UDP-N-acetylmuramate dehydrogenase activity, flavin adenine dinucleotide binding activity and role in oxidation-reduction process	0.0332313	-1.23328	0.00299697	TRUE	FALSE	713	60.7599	676	38.8495	616	78.5602	188	19.3118	1423	100.969	357	24.98	186	9.84056	181	10.2098	269	11.2108	2055	GO:0055114	oxidation-reduction process	unknown	Has domain(s) with predicted UDP-N-acetylmuramate dehydrogenase activity, flavin adenine dinucleotide binding activity and role in oxidation-reduction process
CADANIAG00000899	ANIA_07762	IV	2569339	2570716	1	2569339	2570716		RNA 3'-terminal phosphate cyclase, putative (AFU_orthologue; AFUA_5G07640)	protein_coding	0.0191214	0.829265	0.00776353	FALSE	FALSE	0.771083	-0.419277	0.234072	FALSE	FALSE	RNA 3'-terminal phosphate cyclase	0.00375279	-1.23452	0.000152683	TRUE	FALSE	25	2.13043	56	3.2183	38	4.84625	15	1.54083	72	5.10878	42	2.93882	12	0.634875	20	1.12815	8	0.333407	9112	GO:0005575	cellular_component	Nucleotide metabolism
CADANIAG00004940	ANIA_03776	II	3028881	3030561	1	3028881	3030561		MFS transporter, putative (AFU_orthologue; AFUA_3G01840)	protein_coding	8.49434e-06	1.45655	9.41795e-07	TRUE	FALSE	0.883827	0.235739	0.495407	FALSE	FALSE	Has domain(s) with predicted role in transmembrane transport and integral component of membrane localization	0.0225317	-1.23561	0.0016836	TRUE	FALSE	12	1.02261	17	0.976984	8	1.02026	9	0.924501	28	1.98675	19	1.32947	5	0.264531	6	0.338445	8	0.333407	2809			Transmembrane transport
CADANIAG00004707	ANIA_03981	II	2377311	2378019	1	2377311	2378019		conserved hypothetical protein	protein_coding	1.46391e-09	1.7155	6.13603e-11	TRUE	FALSE	0.740171	0.474961	0.132069	FALSE	FALSE	ORF, Deleted	0.010061	-1.24157	0.000593026	TRUE	FALSE	10	0.852173	5	0.287348	9	1.1478	6	0.616334	21	1.49006	15	1.04958	6	0.317438	5	0.282038	3	0.125028	2257			unknown	ORF, Deleted
CADANIAG00007607	ANIA_06810	I	3199637	3203293	1	3199637	3203293		ThiJ/PfpI family protein (AFU_orthologue; AFUA_3G01210)	protein_coding	8.98727e-07	1.36585	7.4126e-08	TRUE	FALSE	0.941102	0.123948	0.665846	FALSE	FALSE	The gene AN6810 was split, giving rise to AN11984 and AN11985. Only AN11985 was identified in this study to be regulated.	0.000131945	-1.24174	2.21569e-06	TRUE	FALSE	30	2.55652	21	1.20686	20	2.55066	11	1.12995	58	4.11541	15	1.04958	4	0.211625	9	0.507668	16	0.666814	2052			unknown	ORF, Deleted
CADANIAG00007810	ANIA_09042	VII	55370	57647	1	55370	57647	agnC	putative alpha 1,3 glucanase, GH71 family (Eurofung)	protein_coding	1.16298e-06	1.75033	9.86728e-08	TRUE	FALSE	0.757375	0.494929	0.20514	FALSE	FALSE	Putative alpha-1,3-glucanase	0.00833836	-1.24363	0.000450628	TRUE	FALSE	130	11.0782	229	13.1605	79	10.0751	76	7.8069	188	13.3396	124	8.67652	27	1.42847	60	3.38445	46	1.91709	6406	GO:0005575	cellular_component	Carbon metabolism
CADANIAG00002567	ANIA_00169	VIII	4332662	4333176	1	4332662	4333176		conserved hypothetical protein	protein_coding	6.49069e-07	1.20527	5.18524e-08	TRUE	FALSE	0.983542	-0.0442049	0.851373	FALSE	FALSE	protein of unknown function	0.00113908	-1.24497	3.479e-05	TRUE	FALSE	173	14.7426	334	19.1949	146	18.6198	112	11.5049	357	25.3311	179	12.525	59	3.12147	87	4.90745	82	3.41742	632	GO:0005575	cellular_component	unknown
CADANIAG00008059	ANIA_01446	VII	754936	756775	-1	756775	754936	mecB	cystathionine gamma-lyase (CGL) (Eurofung)	protein_coding	9.93959e-24	1.54444	7.2797e-26	TRUE	FALSE	0.757375	0.29833	0.212882	FALSE	FALSE	Cystathionine gamma-lyase, an enzyme involved in methionine, S-adenosylmethionine, and cysteine biosynthesis	2.03773e-05	-1.24542	2.50324e-07	TRUE	FALSE	1060	90.3303	2008	115.399	679	86.5948	674	69.2348	1519	107.781	981	68.6425	293	15.5015	461	26.0039	370	15.4201	1167			Amino acid biosynthesis
CADANIAG00008711	ANIA_02042	VII	2622353	2624609	-1	2624609	2622353		FAD binding domain protein (AFU_orthologue; AFUA_4G10100)	protein_coding	2.93177e-23	1.42786	2.21328e-25	TRUE	FALSE	0.823952	0.180672	0.338199	FALSE	FALSE	Ortholog(s) have cytosol localization	1.61237e-10	-1.24664	4.5429e-13	TRUE	FALSE	228	19.4295	273	15.6892	120	15.3039	129	13.2512	245	17.3841	181	12.6649	57	3.01566	105	5.92279	32	1.33363	4342	GO:0016491; GO:0055114	oxidoreductase activity; oxidation-reduction process	unknown
CADANIAG00006388	ANIA_08657	III	3176884	3179310	-1	3179310	3176884		fructosyl amino acid oxidase, putative (AFU_orthologue; AFUA_8G06440)	protein_coding	1.19651e-07	1.71054	7.56327e-09	TRUE	FALSE	0.782898	0.450917	0.253617	FALSE	FALSE	Has domain(s) with predicted oxidoreductase activity and role in oxidation-reduction process	0.0158719	-1.24822	0.00106075	TRUE	FALSE	281	23.946	241	13.8502	141	17.9821	122	12.5321	496	35.1938	190	13.2947	75	3.96797	98	5.52794	126	5.25116	9347	GO:0016491; GO:0055114	oxidoreductase activity; oxidation-reduction process	unknown
CADANIAG00009326	ANIA_02590	VII	4401411	4403079	-1	4403079	4401411		conserved hypothetical protein	protein_coding	5.56921e-07	1.53484	4.29221e-08	TRUE	FALSE	0.802756	0.281867	0.287495	FALSE	FALSE	Has domain(s) with predicted catalytic activity, heme binding, oxidoreductase activity	0.00484914	-1.24936	0.000217266	TRUE	FALSE	38	3.23826	87	4.99986	17	2.16806	47	4.82795	59	4.18637	27	1.88924	10	0.529063	27	1.523	14	0.583462	7631	GO:0016491; GO:0005575	oxidoreductase activity; cellular_component	unknown	Has domain(s) with predicted catalytic activity, heme binding, oxidoreductase activity
CADANIAG00004528	ANIA_04145	II	1894804	1897572	1	1894804	1897572		conserved hypothetical protein	protein_coding	2.84686e-05	0.850276	3.82682e-06	FALSE	FALSE	0.732639	-0.397758	0.0580984	FALSE	FALSE	The gene AN4145 was split, giving rise to AN12100 and AN12101; Only AN12101 was identified in this study to be regulated.	1.23857e-05	-1.25089	1.29817e-07	TRUE	FALSE	3	0.255652	56	3.2183	18	2.29559	8	0.821779	20	1.41911	20	1.39944	2	0.105813	7	0.394853	9	0.375083	5331			unknown	ORF deleted
CADANIAG00005789	ANIA_04642	III	1426133	1427822	1	1426133	1427822		hypothetical protein	protein_coding	0.000227449	1.47767	4.3343e-05	TRUE	FALSE	0.910992	0.234089	0.572623	FALSE	FALSE	protein of unknown function	0.046152	-1.25302	0.00468852	TRUE	FALSE	351	29.9113	759	43.6194	244	31.118	375	38.5209	367	26.0406	249	17.423	124	6.56038	145	8.17909	127	5.29283	6167	GO:0005575	cellular_component	unknown
CADANIAG00010309	ANIA_02794	VI	2740511	2742414	-1	2742414	2740511		conserved hypothetical protein similar to a fructose transporter (Eurofung)	protein_coding	2.65658e-10	1.63251	9.429e-12	TRUE	FALSE	0.740171	0.375661	0.130903	FALSE	FALSE	Has domain(s) with predicted substrate-specific transmembrane transporter activity, transmembrane transporter activity, role in transmembrane transport and integral component of membrane, membrane localization	1.93716e-09	-1.25646	6.69564e-12	TRUE	FALSE	36	3.06782	48	2.75854	23	2.93326	22	2.25989	43	3.05108	48	3.35865	12	0.634875	16	0.90252	15	0.625138	9300			Transmembrane transport
CADANIAG00006843	ANIA_06167	I	1034329	1035844	1	1034329	1035844		FMN binding oxidoreductase, putative (AFU_orthologue; AFUA_2G08260)	protein_coding	1.75166e-08	1.79009	8.95437e-10	TRUE	FALSE	0.732639	0.531498	0.0459036	FALSE	FALSE	Has domain(s) with predicted FMN binding, catalytic activity, oxidoreductase activity and role in oxidation-reduction process	6.5059e-07	-1.26019	3.84394e-09	TRUE	FALSE	302	25.7356	438	25.1717	194	24.7414	192	19.7227	358	25.402	250	17.493	82	4.33831	124	6.99453	100	4.16759	8838	GO:0016491; GO:0055114; GO:0005575	oxidoreductase activity; oxidation-reduction process; cellular_component	unknown
CADANIAG00008553	ANIA_01897	VII	2131768	2133425	1	2131768	2133425	hmgA	homogentisate 1,2-dioxygenase (Eurofung)	protein_coding	1.25116e-05	1.28147	1.46474e-06	TRUE	FALSE	1	0.014619	1	FALSE	FALSE	Homogentisate 1,2-dioxygenase, enzyme in phenylalanine catabolism	0.0121887	-1.26178	0.000761019	TRUE	FALSE	14	1.19304	21	1.20686	14	1.78546	7	0.719056	35	2.48344	27	1.88924	10	0.529063	12	0.67689	2	0.0833517	4567	GO:0055114; GO:0005575	oxidation-reduction process; cellular_component	Amino acid biosynthesis
CADANIAG00003736	ANIA_05357	V	2791797	2793397	1	2791797	2793397		CFEM domain protein (AFU_orthologue; AFUA_6G14090)	protein_coding	5.28063e-13	1.2112	1.17215e-14	TRUE	FALSE	0.999611	-0.0489852	0.915668	FALSE	FALSE	Predicted glycosylphosphatidylinositol (GPI)-anchored protein	0.0444877	-1.26479	0.00444225	TRUE	FALSE	140	11.9304	270	15.5168	75	9.56496	222	22.8044	93	6.59885	104	7.27708	63	3.33309	64	3.61008	57	2.37552	5209	GO:0009277	fungal-type cell wall	unknown	(GPI)-anchored protein
CADANIAG00002203	ANIA_10081	VIII	3346127	3347367	1	3346127	3347367	xanA	conserved hypothetical protein	protein_coding	4.24288e-07	0.971695	3.15049e-08	FALSE	FALSE	0.826648	-0.3133	0.342061	FALSE	FALSE	Alpha-ketoglutarate-dependent xanthine dioxygenase involved in the oxidation of xanthine to uric acid	0.00418886	-1.27994	0.000175618	TRUE	FALSE	508	43.2904	943	54.1939	330	42.0858	397	40.7808	609	43.2118	437	30.5777	142	7.51269	208	11.7328	239	9.96053	4023	GO:0055114	oxidation-reduction process	other	Alpha-ketoglutarate-dependent xanthine dioxygenase involved in the oxidation of xanthine to uric acid
CADANIAG00003767	ANIA_05329	V	2872627	2874158	1	2872627	2874158		conserved hypothetical protein	protein_coding	1.40576e-05	1.64164	1.66791e-06	TRUE	FALSE	0.757375	0.359244	0.206904	FALSE	FALSE	Has domain(s) with predicted role in transmembrane transport and integral component of membrane localization	6.50653e-05	-1.28325	1.01195e-06	TRUE	FALSE	13	1.10782	42	2.41372	3	0.382599	17	1.74628	54	3.83159	26	1.81927	11	0.581969	13	0.733298	14	0.583462	10869			unknown	Has domain(s) with predicted role in transmembrane transport and integral component of membrane localization
CADANIAG00009184	ANIA_02466	VII	3978497	3980647	-1	3980647	3978497		MFS glucose transporter, putative (AFU_orthologue; AFUA_3G14170)	protein_coding	6.83897e-24	1.18903	4.77764e-26	TRUE	FALSE	0.971001	-0.0929227	0.801469	FALSE	FALSE	Has domain(s) with predicted substrate-specific transmembrane transporter activity, transmembrane transporter activity, role in transmembrane transport and integral component of membrane, membrane localization	0.00809353	-1.2848	0.000435097	TRUE	FALSE	199	16.9582	343	19.7121	128	16.3242	152	15.6138	232	16.4616	162	11.3355	62	3.28019	75	4.23056	93	3.87586	9957			Transmembrane transport
CADANIAG00003048	ANIA_08555	V	846377	847641	-1	847641	846377		hypothetical protein	protein_coding	4.69753e-13	1.80758	1.03395e-14	TRUE	FALSE	0.740171	0.505311	0.127894	FALSE	FALSE	protein of unknown function	0.00530899	-1.28696	0.000247709	TRUE	FALSE	290	24.713	554	31.8382	201	25.6341	316	32.4603	268	19.016	200	13.9944	95	5.02609	147	8.29191	94	3.91753	44	GO:0005575	cellular_component	unknown
CADANIAG00008537	ANIA_01882	VII	2097371	2098845	-1	2098845	2097371		NADH-dependent flavin oxidoreductase, putative (AFU_orthologue; AFUA_2G04320)	protein_coding	4.69753e-13	1.10988	1.03743e-14	TRUE	FALSE	0.908658	-0.192909	0.557688	FALSE	FALSE	Ortholog(s) have role in cell redox homeostasis and cytosol, nucleus localization	0.00285212	-1.30593	0.000108968	TRUE	FALSE	369	31.4452	803	46.1481	212	27.037	374	38.4181	528	37.4644	283	19.8021	132	6.98363	170	9.58928	211	8.79361	10572	GO:0016491; GO:0055114	oxidoreductase activity; oxidation-reduction process	unknown
CADANIAG00008772	ANIA_02099	VII	2800667	2802089	1	2800667	2802089	aodA	alternative oxidase, mitochondrial precursor (Eurofung)	protein_coding	6.68004e-10	1.40471	2.59675e-11	TRUE	FALSE	0.9373	0.0958716	0.647501	FALSE	FALSE	Putative alternative oxidase	4.74096e-06	-1.3088	4.16764e-08	TRUE	FALSE	30	2.55652	52	2.98842	15	1.91299	33	3.38984	21	1.49006	26	1.81927	12	0.634875	15	0.846113	9	0.375083	5179			Respiratory chain
CADANIAG00007765	ANIA_06953	I	3625543	3626992	-1	3626992	3625543		conserved hypothetical protein	protein_coding	2.47079e-07	1.75406	1.71772e-08	TRUE	FALSE	0.732639	0.444942	0.0972419	FALSE	FALSE	protein of unknown function	0.000894708	-1.3116	2.58138e-05	TRUE	FALSE	279	23.7756	313	17.988	161	20.5328	142	14.5866	311	22.0671	208	14.5542	94	4.97319	113	6.37405	79	3.29239	82	GO:0005575	cellular_component	unknown
CADANIAG00008733	ANIA_02064	VII	2679147	2682326	1	2679147	2682326		NRPS-like enzyme, putative (JCVI)	protein_coding	7.71007e-10	1.59488	3.04059e-11	TRUE	FALSE	0.879309	0.273922	0.487124	FALSE	FALSE	Putative nonribosomal peptide synthase (NRPS)-like enzyme	0.0140369	-1.31956	0.000903354	TRUE	FALSE	418	35.6208	694	39.8839	239	30.4804	498	51.1557	1058	75.0707	467	32.6769	197	10.4225	336	18.9529	393	16.3786	10998	GO:0031177; GO:0005575; GO:0000166	phosphopantetheine binding; cellular_component; nucleotide binding	Secondary metabolism
CADANIAG00004526	ANIA_04147	II	1892263	1893152	-1	1893152	1892263		conserved hypothetical protein	protein_coding	4.80901e-07	1.35705	3.64672e-08	TRUE	FALSE	1	0.0332953	0.942742	FALSE	FALSE	protein of unknown function	0.00167436	-1.3247	5.56674e-05	TRUE	FALSE	5	0.426086	17	0.976984	2	0.255066	10	1.02722	10	0.709553	13	0.909635	4	0.211625	4	0.22563	7	0.291731	10961	GO:0005575	cellular_component	unknown
CADANIAG00004728	ANIA_03963	II	2433932	2435005	-1	2435005	2433932		thioredoxin reductase GliT (AFU_orthologue; AFUA_6G09740)	protein_coding	2.84211e-10	1.64169	1.02476e-11	TRUE	FALSE	0.785317	0.31037	0.258613	FALSE	FALSE	Putative gliotoxin reductase	2.93382e-05	-1.32822	3.90163e-07	TRUE	FALSE	28	2.38608	24	1.37927	16	2.04053	15	1.54083	60	4.25732	19	1.32947	13	0.687781	8	0.45126	22	0.916869	4767	GO:0055114; GO:0036146; GO:0016971; GO:0005575	oxidation-reduction process; cellular response to mycotoxin; flavin-linked sulfhydryl oxidase activity; cellular_component	Secondary metabolism	Putative gliotoxin reductase
CADANIAG00009366	ANIA_09226	VI	29655	37503	1	29655	37503		nonribosomal peptide synthase, putative (Eurofung)	protein_coding	5.76031e-06	1.45524	5.97125e-07	TRUE	FALSE	0.949805	0.116131	0.692172	FALSE	FALSE	Putative nonribosomal peptide synthase (NRPS)	0.00430459	-1.33372	0.000185321	TRUE	FALSE	10	0.852173	22	1.26433	4	0.510131	10	1.02722	12	0.851464	8	0.559776	2	0.105813	5	0.282038	7	0.291731	641	GO:0031177; GO:0005575	phosphopantetheine binding; cellular_component	Secondary metabolism
CADANIAG00003047	ANIA_08554	V	844141	845025	-1	845025	844141		conserved hypothetical protein	protein_coding	3.02364e-07	1.75434	2.15317e-08	TRUE	FALSE	0.795292	0.392546	0.274867	FALSE	FALSE	Has domain(s) with predicted oxidoreductase activity and role in oxidation-reduction process	0.00596463	-1.35038	0.000289217	TRUE	FALSE	25	2.13043	35	2.01144	15	1.91299	15	1.54083	50	3.54777	14	0.979607	14	0.740688	9	0.507668	13	0.541786	8472	GO:0016491; GO:0055114; GO:0005575	oxidoreductase activity; oxidation-reduction process; cellular_component	unknown	Has domain(s) with predicted oxidoreductase activity and role in oxidation-reduction process
CADANIAG00006555	ANIA_06424	I	234557	235316	-1	235316	234557		conserved hypothetical protein	protein_coding	5.02737e-09	1.51979	2.29418e-10	TRUE	FALSE	0.949805	0.163963	0.688519	FALSE	FALSE	protein of unknown function	0.0112695	-1.35642	0.000694736	TRUE	FALSE	46	3.91999	100	5.74696	32	4.08105	81	8.32051	120	8.51464	61	4.26829	46	2.43369	31	1.74863	49	2.04212	3323	GO:0055114; ANIA_06424	oxidation-reduction process; cellular_component	unknown
CADANIAG00001010	ANIA_09244	VIII	42522	49458	-1	49458	42522		nonribosomal peptide synthase, putative (JCVI)	protein_coding	5.63526e-06	1.67264	5.80353e-07	TRUE	FALSE	0.842837	0.30689	0.387537	FALSE	FALSE	Putative nonribosomal peptide synthase	0.000188743	-1.36629	3.53109e-06	TRUE	FALSE	2317	197.448	6981	401.195	2190	279.297	1661	170.622	3357	238.197	2868	200.68	782	41.3727	1445	81.5089	1410	58.763	5628	GO:0031177; GO:0005575	phosphopantetheine binding; cellular_component	Secondary metabolism
CADANIAG00000543	ANIA_07451	IV	1526644	1530283	-1	1530283	1526644	gdhB	NAD dependent glutamate dehydrogenase (Eurofung)	protein_coding	1.54349e-11	1.44915	4.4522e-13	TRUE	FALSE	0.977155	0.0753052	0.823187	FALSE	FALSE	Putative NAD-glutamate dehydrogenase with a predicted role in glutamate and glutamine metabolism	0.000148368	-1.37317	2.5918e-06	TRUE	FALSE	32	2.72695	94	5.40214	25	3.18832	68	6.98512	65	4.6121	45	3.14874	25	1.32266	28	1.57941	36	1.50033	5410	GO:0055114; GO:0000166	oxidation-reduction process; nucleotide binding	Amino acid biosynthesis
CADANIAG00002803	ANIA_08337	V	163527	164583	1	163527	164583		high affinity zinc ion transporter, putative (AFU_orthologue; AFUA_1G01550)	protein_coding	5.89471e-17	1.9385	8.30241e-19	TRUE	FALSE	0.732639	0.556052	0.0334552	FALSE	FALSE	Ortholog(s) have high-affinity zinc transmembrane transporter activity and role in conidium formation, regulation of growth rate, response to zinc ion, zinc II ion transmembrane import	0.00147557	-1.37826	4.80602e-05	TRUE	FALSE	1849	157.567	4089	234.993	1834	233.895	922	94.71	2730	193.708	2261	158.207	628	33.2251	1060	59.792	1023	42.6344	86			Development	Ortholog(s) have high-affinity zinc transmembrane transporter activity and role in conidium formation, regulation of growth rate, response to zinc ion, zinc II ion transmembrane import
CADANIAG00006535	ANIA_06441	I	170813	171984	-1	171984	170813		conserved hypothetical protein	protein_coding	0.00933943	1.02449	0.003298	TRUE	FALSE	0.806073	-0.370865	0.297848	FALSE	FALSE	protein of unknown function	0.00489878	-1.39285	0.000221392	TRUE	FALSE	360	30.6782	295	16.9535	283	36.0918	190	19.5172	904	64.1436	289	20.2219	167	8.83534	206	11.62	269	11.2108	6502	GO:0005575	cellular_component	unknown
CADANIAG00007326	ANIA_06552	I	2390242	2391688	1	2390242	2391688		conserved hypothetical protein	protein_coding	5.84097e-14	1.42673	1.14516e-15	TRUE	FALSE	1	0.0272973	0.930949	FALSE	FALSE	Putative F-box protein	5.56696e-05	-1.39327	8.219e-07	TRUE	FALSE	58	4.9426	87	4.99986	44	5.61145	64	6.57423	120	8.51464	55	3.84846	44	2.32788	32	1.80504	41	1.70871	9340	GO:0005575	cellular_component	Protein degradation	Putative F-box protein
CADANIAG00001976	ANIA_00694	VIII	2718639	2719535	-1	2719535	2718639		conserved hypothetical protein	protein_coding	0.000314464	1.08838	6.27865e-05	TRUE	FALSE	0.872818	-0.302055	0.472658	FALSE	FALSE	protein of unknown function	0.0330803	-1.39349	0.00297553	TRUE	FALSE	38	3.23826	79	4.5401	27	3.44339	51	5.23884	44	3.12203	21	1.46941	19	1.00522	16	0.90252	26	1.08357	10570	GO:0005622	intracellular	unknown
CADANIAG00002209	ANIA_00483	VIII	3360551	3361129	1	3360551	3361129		conserved hypothetical protein	protein_coding	8.06971e-16	1.48325	1.2366e-17	TRUE	FALSE	0.957413	0.0792232	0.724553	FALSE	FALSE	protein of unknown function	4.40475e-06	-1.39685	3.77281e-08	TRUE	FALSE	16	1.36348	27	1.55168	16	2.04053	40	4.10889	29	2.0577	17	1.18952	13	0.687781	19	1.07174	12	0.50011	2918	GO:0005575	cellular_component	unknown
CADANIAG00005163	ANIA_03581	II	3642057	3643553	1	3642057	3643553	trxR	hypothetical thioredoxin reductase (Eurofung)	protein_coding	6.00827e-10	2.0551	2.3153e-11	TRUE	TRUE	0.732639	0.644857	0.0187062	FALSE	FALSE	Thioredoxin reductase	1.0467e-06	-1.41049	7.19586e-09	TRUE	FALSE	14	1.19304	40	2.29879	8	1.02026	32	3.28711	20	1.41911	22	1.53938	7	0.370344	18	1.01534	13	0.541786	10319	GO:0055114; GO:0005622	oxidation-reduction process; intracellular	Oxidative stress response
CADANIAG00010175	ANIA_02912	VI	2365760	2366861	1	2365760	2366861		conserved hypothetical protein	protein_coding	8.34778e-05	1.36815	1.33757e-05	TRUE	FALSE	1	-0.0518913	0.925473	FALSE	FALSE	protein of unknown function	0.0140369	-1.41111	0.000904889	TRUE	FALSE	19	1.61913	19	1.09192	12	1.53039	17	1.74628	28	1.98675	11	0.769691	13	0.687781	5	0.282038	10	0.416759	7300	GO:0005575	cellular_component	unknown
CADANIAG00005568	ANIA_10601	III	812414	813730	-1	813730	812414		LPS glycosyltransferase, putative (AFU_orthologue; AFUA_8G00650)	protein_coding	1.30871e-05	1.64635	1.53949e-06	TRUE	FALSE	0.891696	0.228943	0.514724	FALSE	FALSE	protein of unknown function	0.0189159	-1.41613	0.00132601	TRUE	FALSE	3105	264.6	4154	238.729	1774	226.243	2367	243.144	6042	428.712	3075	215.164	1745	92.3214	2342	132.106	1385	57.7211	6947	GO:0005575	cellular_component	unknown
CADANIAG00000242	ANIA_10906	IV	672376	674526	1	672376	674526		Putative Zn(II)2Cys6 transcription factor (Eurofung)	protein_coding	1.09544e-05	0.863709	1.25528e-06	FALSE	FALSE	0.751511	-0.565753	0.17778	FALSE	FALSE	Has domain(s) with predicted DNA binding, zinc ion binding activity, role in transcription, DNA-templated and nucleus localization	0.0165471	-1.42427	0.0011177	TRUE	FALSE	34	2.89739	44	2.52866	38	4.84625	13	1.33539	12	0.851464	29	2.02919	5	0.264531	10	0.564075	12	0.50011	2399			Transcription factor
CADANIAG00008128	ANIA_01503	VII	946749	947679	-1	947679	946749		dihydrodipicolinate synthetase family protein (AFU_orthologue; AFUA_8G05040)	protein_coding	9.6657e-05	1.23943	1.58354e-05	TRUE	FALSE	0.919763	-0.198487	0.59685	FALSE	FALSE	4-hydroxy-2-oxoglutarate aldolase	0.00418891	-1.42782	0.000177508	TRUE	FALSE	1379	117.515	2836	162.984	1291	164.645	885	90.9092	2112	149.858	1766	123.57	474	25.0776	933	52.6282	935	38.9669	9259	GO:0005575	cellular_component	unknown
CADANIAG00003740	ANIA_05354	V	2804182	2805330	-1	2805330	2804182		quinone oxidoreductase, putative (AFU_orthologue; AFUA_8G01420)	protein_coding	0.0566137	1.00759	0.0280966	FALSE	FALSE	0.815917	-0.434112	0.323205	FALSE	FALSE	Has domain(s) with predicted oxidoreductase activity, transferase activity, transferring acyl groups other than amino-acyl groups activity and role in oxidation-reduction process	0.0149083	-1.44065	0.000969468	TRUE	FALSE	1392	118.622	2051	117.87	1021	130.211	580	59.5789	2755	195.482	1516	106.077	638	33.7542	710	40.0493	1016	42.3427	5062	GO:0016491; GO:0055114; GO:0005575; GO:0000166	oxidoreductase activity; oxidation-reduction process; cellular_component; nucleotide binding	unknown
CADANIAG00009263	ANIA_02535	VII	4202088	4202571	-1	4202571	4202088		conserved hypothetical protein	protein_coding	4.59392e-11	1.74147	1.44417e-12	TRUE	FALSE	0.7914	0.281695	0.265145	FALSE	FALSE	protein of unknown function	0.000318454	-1.45172	6.74737e-06	TRUE	FALSE	4143	353.055	4660	267.808	2391	304.931	2844	292.142	8105	575.093	3964	277.369	2353	124.488	2392	134.927	2726	113.608	7580	GO:0005575	cellular_component	unknown
CADANIAG00008318	ANIA_01677	VII	1534268	1535707	1	1534268	1535707		short chain dehydrogenase, putative (AFU_orthologue; AFUA_4G08710)	protein_coding	2.37221e-35	1.88181	6.94958e-38	TRUE	FALSE	0.740171	0.42698	0.133049	FALSE	FALSE	Short-chain dehydrogenase	0.000170506	-1.45442	3.09381e-06	TRUE	FALSE	31	2.64173	115	6.60901	21	2.67819	36	3.698	46	3.26395	33	2.30907	18	0.952313	23	1.29737	19	0.791841	2703	GO:0016491; GO:0000166	oxidoreductase activity; nucleotide binding	unknown
CADANIAG00008376	ANIA_01731	VII	1686396	1688015	-1	1688015	1686396	prnD	proline oxidase, proline utilization (Eurofung)	protein_coding	6.63596e-06	1.73505	7.02103e-07	TRUE	FALSE	0.905992	0.27317	0.546598	FALSE	FALSE	Putative proline dehydrogenase with a predicted role in proline metabolism	0.00359546	-1.45507	0.000145877	TRUE	FALSE	2050	174.695	4884	280.682	1896	241.802	1204	123.678	2830	200.804	2424	169.612	745	39.4152	1313	74.0631	1254	52.2615	8262	GO:0055114	oxidation-reduction process	Amino acid biosynthesis
CADANIAG00002299	ANIA_00400	VIII	3620976	3621477	-1	3621477	3620976		conserved hypothetical protein	protein_coding	7.55185e-13	1.57728	1.72735e-14	TRUE	FALSE	0.966357	0.0962547	0.774697	FALSE	FALSE	protein of unknown function	0.000145481	-1.4688	2.47579e-06	TRUE	FALSE	415	35.3652	895	51.4353	306	39.0251	344	35.3365	634	44.9857	426	29.8081	197	10.4225	264	14.8916	281	11.7109	134	GO:0005575	cellular_component	unknown
CADANIAG00000030	ANIA_07397	IV	79909	82584	1	79909	82584		conserved hypothetical protein	protein_coding	2.21989e-12	1.86248	5.30273e-14	TRUE	FALSE	0.802395	0.38678	0.286606	FALSE	FALSE	protein of unknown function	0.00938645	-1.47312	0.000542686	TRUE	FALSE	52	4.4313	95	5.45961	32	4.08105	94	9.6559	103	7.3084	75	5.2479	42	2.22206	46	2.59475	62	2.5839	7630	GO:0005575	cellular_component	unknown
CADANIAG00003697	ANIA_05395	V	2695176	2697843	-1	2697843	2695176		conserved hypothetical protein	protein_coding	5.37126e-06	1.66773	5.48322e-07	TRUE	FALSE	0.912009	0.180625	0.574284	FALSE	FALSE	protein of unknown function	0.00693283	-1.4784	0.00035004	TRUE	FALSE	42	3.57912	61	3.50565	21	2.67819	21	2.15717	44	3.12203	28	1.95921	13	0.687781	20	1.12815	16	0.666814	1513	GO:0005575	cellular_component	unknown
CADANIAG00007272	ANIA_06503	I	2253966	2255517	-1	2255517	2253966		C2H2 transcription factor (Azf1), putative (AFU_orthologue; AFUA_6G05160)	protein_coding	2.17815e-09	0.998843	9.32616e-11	FALSE	FALSE	0.795292	-0.497005	0.274625	FALSE	FALSE	Has domain(s) with predicted nucleic acid binding, zinc ion binding activity	0.00800555	-1.49879	0.00042766	TRUE	FALSE	1773	151.09	3456	198.615	1306	166.558	1384	142.168	3278	232.592	1723	120.562	1020	53.9644	1085	61.2022	1287	53.6368	8839	GO:0005622	intracellular	Transcription factor
CADANIAG00002724	ANIA_00033	VIII	4752744	4753873	-1	4753873	4752744		hypothetical protein	protein_coding	0.19888	0.681963	0.129031	FALSE	FALSE	0.742426	-0.831549	0.145844	FALSE	FALSE	protein of unknown function	0.0261132	-1.51611	0.00212342	TRUE	FALSE	470	40.0521	1083	62.2396	278	35.4541	597	61.3252	743	52.7198	344	24.0704	283	14.9725	305	17.2043	357	14.8783	5857	GO:0005575	cellular_component	unknown
CADANIAG00005255	ANIA_03502	II	3905448	3907982	1	3905448	3907982		Putative Zn(II)2Cys6 transcription factor (Eurofung)	protein_coding	0.000585466	1.60761	0.000129099	TRUE	FALSE	0.984589	0.0796074	0.857497	FALSE	FALSE	putative transcription factor	0.0246315	-1.52017	0.0019321	TRUE	FALSE	9	0.766955	18	1.03445	3	0.382599	8	0.821779	17	1.20624	9	0.629748	6	0.317438	6	0.338445	6	0.250055	4021			Secondary metabolism
CADANIAG00004588	ANIA_04091	II	2050242	2054159	1	2050242	2054159		conserved hypothetical protein	protein_coding	0.000246349	1.3095	4.7521e-05	TRUE	FALSE	0.881213	-0.221875	0.490441	FALSE	FALSE	ABC transporter	0.000728525	-1.5235	1.97054e-05	TRUE	FALSE	1646	140.268	3342	192.063	1034	131.869	1943	199.589	1425	101.111	1442	100.9	848	44.8645	830	46.8182	1111	46.3019	777			Transmembrane transport	Has domain(s) with predicted ATP binding, ATPase activity, coupled to transmembrane movement of substances activity, role in transmembrane transport and integral component of membrane localization
CADANIAG00009078	ANIA_02375	VII	3669985	3672012	1	3669985	3672012		Putative Zn(II)2Cys6 transcription factor (Eurofung)	protein_coding	0.00642719	1.03851	0.0021296	TRUE	FALSE	0.828417	-0.486471	0.346316	FALSE	FALSE	Has domain(s) with predicted RNA polymerase II transcription factor activity, sequence-specific DNA binding, zinc ion binding activity, role in regulation of transcription, DNA-templated and nucleus localization	0.0158815	-1.53598	0.00106318	TRUE	FALSE	20	1.70435	64	3.67806	32	4.08105	22	2.25989	102	7.23744	52	3.63854	21	1.11103	29	1.63582	43	1.79206	8885			Transcription factor
CADANIAG00007223	ANIA_05823	I	2139273	2141047	-1	2141047	2139273	sidA	ornithine monooxygenase (Eurofung)	protein_coding	4.1919e-31	1.75288	1.79484e-33	TRUE	FALSE	0.895799	0.21021	0.51982	FALSE	FALSE	L-ornithine N5-monooxygenase	1.78156e-05	-1.5402	2.07311e-07	TRUE	FALSE	28	2.38608	49	2.81601	18	2.29559	31	3.18439	34	2.41248	47	3.28868	19	1.00522	24	1.35378	18	0.750166	2129			Iron assimilation
CADANIAG00006393	ANIA_08652	III	3192231	3193824	-1	3193824	3192231		conserved hypothetical protein	protein_coding	0.025752	1.37773	0.0110001	TRUE	FALSE	0.952834	-0.19652	0.705224	FALSE	FALSE	protein of unknown function	0.0312759	-1.55192	0.00271412	TRUE	FALSE	12	1.02261	43	2.47119	17	2.16806	9	0.924501	28	1.98675	34	2.37905	10	0.529063	16	0.90252	11	0.458434	2836	GO:0005575	cellular_component	unknown
CADANIAG00003436	ANIA_05634	V	1883854	1885825	1	1883854	1885825	acuD	isocitrate lyase (Eurofung)	protein_coding	5.18334e-11	1.55616	1.65867e-12	TRUE	FALSE	1	-0.00114931	0.996672	FALSE	FALSE	Isocitrate lyase, required for utilization of acetate and fatty acids as carbon sources	0.000390409	-1.55199	8.97593e-06	TRUE	FALSE	18	1.53391	13	0.747105	5	0.637664	19	1.95172	35	2.48344	12	0.839663	11	0.581969	10	0.564075	16	0.666814	11016			Carbon metabolism
CADANIAG00009032	ANIA_02337	VII	3545155	3545978	1	3545155	3545978		hypothetical protein	protein_coding	3.03076e-35	1.61476	9.22035e-38	TRUE	FALSE	0.977155	0.059756	0.82665	FALSE	FALSE	protein of unknown function	6.63328e-07	-1.55335	4.03693e-09	TRUE	FALSE	708	60.3338	663	38.1024	381	48.59	430	44.1706	1659	117.715	650	45.4818	448	23.702	454	25.609	578	24.0886	826	GO:0005575	cellular_component	unknown
CADANIAG00003993	ANIA_07974	II	367066	367586	-1	367586	367066		conserved hypothetical protein	protein_coding	7.77978e-09	2.01	3.708e-10	TRUE	TRUE	0.757375	0.439786	0.209288	FALSE	FALSE	protein of unknown function	0.00261878	-1.55757	9.71013e-05	TRUE	FALSE	37	3.15304	65	3.73553	30	3.82599	34	3.49256	47	3.3349	38	2.65893	23	1.21684	29	1.63582	14	0.583462	6149	GO:0005575	cellular_component	unknown
CADANIAG00007899	ANIA_08959	VII	291626	292264	-1	292264	291626		benzodiazepine receptor family protein (AFU_orthologue; AFUA_3G01430)	protein_coding	0.000547768	0.938144	0.000119232	FALSE	FALSE	0.732639	-0.644073	0.0360857	FALSE	FALSE	TspO/MBR family	3.06798e-05	-1.57155	4.12144e-07	TRUE	FALSE	99	8.43651	116	6.66648	68	8.67223	32	3.28711	127	9.01133	81	5.66773	34	1.79881	52	2.93319	43	1.79206	4135			unknown
CADANIAG00006604	ANIA_06380	I	362517	363468	1	362517	363468		conserved hypothetical protein	protein_coding	2.28218e-21	1.77161	1.95432e-23	TRUE	FALSE	0.841091	0.194824	0.379646	FALSE	FALSE	protein of unknown function	5.44012e-10	-1.57391	1.77802e-12	TRUE	FALSE	155	13.2087	322	18.5052	93	11.8606	164	16.8465	224	15.894	119	8.32666	81	4.28541	99	5.58435	118	4.91775	10573	GO:0005575	cellular_component	unknown
CADANIAG00008492	ANIA_01841	VII	1984764	1985784	-1	1985784	1984764		NmrA-like family protein, putative (AFU_orthologue; AFUA_4G02840)	protein_coding	2.41037e-09	2.07283	1.04019e-10	TRUE	TRUE	0.732639	0.496341	0.0470653	FALSE	FALSE	NAD(P)H dehydrogenase (quinone)	7.29622e-06	-1.57645	7.31842e-08	TRUE	FALSE	28	2.38608	100	5.74696	28	3.57092	24	2.46534	64	4.54114	39	2.72891	23	1.21684	16	0.90252	34	1.41698	8138	GO:0005575; GO:0000166	cellular_component; nucleotide binding	unknown
CADANIAG00005130	ANIA_03612	II	3545340	3553237	-1	3553237	3545340		polyketide synthase, putative (JCVI)	protein_coding	1.01449e-05	2.01332	1.15135e-06	TRUE	TRUE	0.848785	0.396793	0.404332	FALSE	FALSE	Putative polyketide synthase	0.000469061	-1.6046	1.14715e-05	TRUE	FALSE	4939	420.888	8761	503.491	3721	474.55	2236	229.687	6927	491.508	4561	319.142	2062	109.093	2688	151.623	2855	118.985	8080	GO:0016491; GO:0055114; GO:0031177; GO:0005575; GO:0000166	oxidoreductase activity; oxidation-reduction process; phosphopantetheine binding; cellular_component; nucleotide binding	Secondary metabolism
CADANIAG00007853	ANIA_09001	VII	173979	175475	1	173979	175475		conserved hypothetical protein	protein_coding	1.89325e-21	1.31138	1.5786e-23	TRUE	FALSE	0.822018	-0.306321	0.335396	FALSE	FALSE	protein of unknown function	2.93308e-05	-1.61771	3.86758e-07	TRUE	FALSE	151	12.8678	276	15.8616	88	11.2229	91	9.34773	196	13.9072	139	9.7261	71	3.75634	99	5.58435	67	2.79228	9081	GO:0005575	cellular_component	unknown
CADANIAG00000933	ANIA_07793	IV	2653018	2655824	1	2653018	2655824		conserved hypothetical protein	protein_coding	1.19207e-45	1.65557	2.01477e-48	TRUE	FALSE	1	0.0214104	0.960227	FALSE	FALSE	The gene AN7793 was split, giving rise to AN12087 and AN12088. Only AN12088 was identified in this study to be regulated.	0.00539795	-1.63686	0.000252987	TRUE	FALSE	14	1.19304	15	0.862044	7	0.89273	16	1.64356	18	1.2772	16	1.11955	10	0.529063	11	0.620483	8	0.333407	6192			unknown	ORF, Deleted
CADANIAG00001083	ANIA_09303	VIII	228188	229317	-1	229317	228188		methyltransferase, putative (AFU_orthologue; AFUA_3G13140)	protein_coding	8.74863e-08	1.93174	5.32311e-09	TRUE	FALSE	0.757627	0.287952	0.214622	FALSE	FALSE	protein of unknown function	2.61177e-05	-1.64333	3.38503e-07	TRUE	FALSE	63	5.36869	127	7.29864	29	3.69845	60	6.16334	125	8.86942	57	3.9884	36	1.90463	36	2.03067	74	3.08401	7884	GO:0005575	cellular_component	unknown
CADANIAG00010561	ANIA_03858	II	2798159	2798749	1	2798159	2798749		conserved hypothetical protein	pseudogene	5.36933e-12	2.87776	1.42128e-13	TRUE	TRUE	0.732639	1.24729	0.00558162	FALSE	FALSE	pseudogene	0.0162205	-1.65009	0.00109136	TRUE	FALSE	606	51.6417	1117	64.1936	369	47.0596	628	64.5096	1856	131.693	643	44.992	535	28.3048	659	37.1726	586	24.4221	4348			unknown	pseudogene
CADANIAG00009959	ANIA_03117	VI	1718837	1722473	-1	1722473	1718837		copper resistance P-type ATPase (Eurofung)	protein_coding	0.000227449	1.37098	4.33626e-05	TRUE	FALSE	0.811701	-0.282029	0.312817	FALSE	FALSE	Ortholog(s) have copper-exporting ATPase activity, role in cadmium ion transport, cellular copper ion homeostasis, copper ion transport, silver ion transport and plasma membrane localization	0.00198763	-1.65281	6.85338e-05	TRUE	FALSE	33	2.81217	41	2.35625	28	3.57092	20	2.05445	47	3.3349	27	1.88924	14	0.740688	24	1.35378	16	0.666814	3154			unknown
CADANIAG00010305	ANIA_02798	VI	2727742	2728260	1	2727742	2728260		conserved hypothetical protein	protein_coding	0.000848691	1.56181	0.000199096	TRUE	FALSE	0.998619	-0.0964329	0.905394	FALSE	FALSE	Has domain(s) with predicted role in response to stress and integral component of membrane localization	0.021409	-1.67245	0.00156834	TRUE	FALSE	28	2.38608	67	3.85046	23	2.93326	16	1.64356	51	3.61872	60	4.19832	27	1.42847	16	0.90252	30	1.25028	7168			unknown	Has domain(s) with predicted role in response to stress and integral component of membrane localization
CADANIAG00002066	ANIA_00609	VIII	2939281	2941315	1	2939281	2941315	sidI	acyl CoA synthetase (Eurofung)	protein_coding	0.0108355	1.30267	0.00394106	TRUE	FALSE	0.843174	-0.395184	0.394063	FALSE	FALSE	Triacetylfusarinine C (TAFC) biosynthetic enoyl-CoA hydratase	0.0225933	-1.67283	0.00169329	TRUE	FALSE	2189	186.541	5926	340.565	2134	272.155	1244	127.787	2757	195.624	2682	187.665	975	51.5836	1443	81.3961	1425	59.3881	2737			Iron assimilation
CADANIAG00005336	ANIA_05053	III	144603	145644	1	144603	145644		conserved hypothetical protein	protein_coding	0.00926833	1.12589	0.00326767	TRUE	FALSE	0.802395	-0.558417	0.285808	FALSE	FALSE	Has domain(s) with predicted N-acetyltransferase activity	0.0261132	-1.68535	0.00212109	TRUE	FALSE	238	20.2817	350	20.1144	135	17.2169	147	15.1002	323	22.9186	236	16.5134	114	6.03131	153	8.63035	147	6.12635	10476	GO:0005575	cellular_component	unknown	Has domain(s) with predicted N-acetyltransferase activity
CADANIAG00002296	ANIA_00403	VIII	3613946	3616011	-1	3616011	3613946		pyridine nucleotide-disulphide oxidoreductase AMID-like, putative (AFU_orthologue; AFUA_1G17180)	protein_coding	2.71227e-09	1.9156	1.17741e-10	TRUE	FALSE	0.944162	0.217459	0.672183	FALSE	FALSE	Pyridine nucleotide-disulphide oxidoreductase	0.00899807	-1.68655	0.000507572	TRUE	FALSE	53	4.51651	70	4.02287	33	4.20858	41	4.21161	119	8.44369	43	3.00879	24	1.26975	44	2.48193	53	2.20882	10226	GO:0016491; GO:0055114	oxidoreductase activity; oxidation-reduction process	other
CADANIAG00001160	ANIA_09373	VIII	441915	443399	1	441915	443399		Putative Zn(II)2Cys6 transcription factor (Eurofung)	protein_coding	1.27646e-07	1.40578	8.15729e-09	TRUE	FALSE	0.850237	-0.286656	0.409218	FALSE	FALSE	Fungal Zn(2)-Cys(6) binuclear cluster domain	0.000241686	-1.69436	4.82119e-06	TRUE	FALSE	305	25.9913	677	38.9069	230	29.3326	298	30.6113	583	41.367	295	20.6417	197	10.4225	250	14.1019	258	10.7524	880			Transcription factor
CADANIAG00009539	ANIA_09076	VI	514242	515351	1	514242	515351		conserved hypothetical protein	protein_coding	2.3471e-05	1.39523	3.02016e-06	TRUE	FALSE	0.919763	-0.313615	0.596591	FALSE	FALSE	Transcript repressed by light in developmentally competent mycelia	0.0169223	-1.71421	0.00115002	TRUE	FALSE	19	1.61913	48	2.75854	18	2.29559	31	3.18439	47	3.3349	32	2.2391	13	0.687781	25	1.41019	29	1.2086	65	GO:0005575	cellular_component	unknown	Transcript repressed by light in developmentally competent mycelia
CADANIAG00006556	ANIA_06423	I	235476	236123	-1	236123	235476		conserved hypothetical protein	protein_coding	3.14383e-12	2.2074	7.82859e-14	TRUE	TRUE	0.732639	0.487447	0.108697	FALSE	FALSE	protein of unknown function	3.30439e-05	-1.71976	4.58064e-07	TRUE	FALSE	144	12.2713	264	15.172	112	14.2837	101	10.375	92	6.52789	165	11.5454	50	2.64531	88	4.96386	80	3.33407	5180			unknown
CADANIAG00003021	ANIA_08532	V	770289	771402	-1	771402	770289		conserved hypothetical protein	protein_coding	6.17324e-05	1.39484	9.43896e-06	TRUE	FALSE	0.841265	-0.350448	0.382099	FALSE	FALSE	(GPI)-anchored protein	0.000217237	-1.7239	4.12704e-06	TRUE	FALSE	2215	188.756	5375	308.899	1657	211.322	1654	169.903	4646	329.659	2478	173.39	1595	84.3855	1664	93.8621	1958	81.6013	4656	GO:0005575	cellular_component	unknown	(GPI)-anchored protein
CADANIAG00003228	ANIA_05228	V	1359363	1360667	-1	1360667	1359363		NADH:flavin oxidoreductase/NADH oxidase family protein (AFU_orthologue; AFUA_2G04060)	protein_coding	3.90868e-07	2.27318	2.85829e-08	TRUE	TRUE	0.732639	0.526569	0.0629782	FALSE	FALSE	Putative NADH:flavin oxidoreductase/NADH oxidase; intracellular, menadione stress-induced protein	8.11355e-08	-1.74689	3.65763e-10	TRUE	FALSE	160	13.6348	498	28.6199	127	16.1967	134	13.7648	172	12.2043	306	21.4114	108	5.71388	137	7.72783	120	5.0011	9181	GO:0055114; GO:0005622	oxidation-reduction process; intracellular	Secondary metabolism	Putative NADH:flavin oxidoreductase/NADH oxidase; intracellular, menadione stress-induced protein
CADANIAG00005733	ANIA_10592	III	1274330	1274882	-1	1274882	1274330		conserved hypothetical protein	protein_coding	7.14996e-05	1.16574	1.1214e-05	TRUE	FALSE	0.732639	-0.59886	0.0848066	FALSE	FALSE	protein of unknown function	5.75876e-05	-1.75181	8.63197e-07	TRUE	FALSE	468	39.8817	992	57.0099	522	66.5722	233	23.9343	939	66.6271	788	55.1379	297	15.7132	421	23.7476	420	17.5039	85	GO:0005575	cellular_component	unknown
CADANIAG00008688	ANIA_02020	VII	2533279	2534633	-1	2534633	2533279	ahpA	hypothetical protein similar to AhpA (Eurofung)	protein_coding	5.67835e-06	1.75528	5.8607e-07	TRUE	FALSE	1	-0.00962225	1	FALSE	FALSE	Has domain(s) with predicted DNA binding transcription factor activity, sequence-specific DNA binding activity and role in regulation of transcription, DNA-templated	0.0248252	-1.75867	0.00195892	TRUE	FALSE	63	5.36869	117	6.72395	28	3.57092	42	4.31434	67	4.75401	44	3.07877	23	1.21684	41	2.31271	30	1.25028	5436	GO:0005575	cellular_component	Transcription factor	Has domain(s) with predicted DNA binding transcription factor activity, sequence-specific DNA binding activity and role in regulation of transcription, DNA-templated
CADANIAG00007092	ANIA_05937	I	1742379	1743204	1	1742379	1743204		conserved hypothetical protein	protein_coding	0.000758536	1.99249	0.000174784	TRUE	FALSE	0.967247	0.213181	0.78165	FALSE	FALSE	Has domain(s) with predicted manganese ion binding, nutrient reservoir activity	0.022242	-1.76206	0.00164691	TRUE	FALSE	39	3.32347	57	3.27577	30	3.82599	24	2.46534	48	3.40586	51	3.56857	21	1.11103	30	1.69223	24	1.00022	6328			unknown	Has domain(s) with predicted manganese ion binding, nutrient reservoir activity
CADANIAG00000647	ANIA_07541	IV	1832663	1833721	1	1832663	1833721	cut2	cutinase, putative (AFU_orthologue; AFUA_4G14120)	protein_coding	0.000590894	1.42483	0.00013074	TRUE	FALSE	0.913553	-0.31832	0.577328	FALSE	FALSE	Protein with cutinase activity, involved in carbohydrate catabolism	0.0225879	-1.77841	0.00169033	TRUE	FALSE	103	8.77738	269	15.4593	88	11.2229	78	8.01234	153	10.8562	140	9.79607	59	3.12147	83	4.68182	88	3.66748	2270			Carbon metabolism
CADANIAG00002673	ANIA_10011	VIII	4622159	4623700	1	4622159	4623700		succinate semialdehyde dehydrogenase (Eurofung)	protein_coding	0.0878152	1.30038	0.0477094	FALSE	FALSE	0.814148	-0.517222	0.317545	FALSE	FALSE	Has domain(s) with predicted oxidoreductase activity, oxidoreductase activity, acting on the aldehyde or oxo group of donors, NAD or NADP as acceptor activity and role in oxidation-reduction process	0.0120843	-1.79071	0.00075314	TRUE	FALSE	59	5.02782	107	6.14925	48	6.12158	72	7.39601	74	5.2507	63	4.40823	32	1.693	49	2.76397	55	2.29217	2056	GO:0055114; GO:0005575	oxidation-reduction process; cellular_component	Carbon metabolism
CADANIAG00002710	ANIA_00045	VIII	4707631	4709236	1	4707631	4709236		solid-state culture expressed protein (Aos23), putative (AFU_orthologue; AFUA_5G12590)	protein_coding	4.48648e-07	1.21527	3.3617e-08	TRUE	FALSE	0.732639	-0.582428	0.0579253	FALSE	FALSE	Transcript induced by light in in developmentally competent mycelia	8.02951e-05	-1.7958	1.27596e-06	TRUE	FALSE	209	17.8104	508	29.1946	209	26.6544	128	13.1485	456	32.3556	219	15.3239	115	6.08422	180	10.1534	196	8.16847	8523	GO:0005575	cellular_component	Development	Transcript induced by light in in developmentally competent mycelia
CADANIAG00006552	ANIA_06426	I	229008	230268	1	229008	230268		conserved hypothetical protein	protein_coding	2.45712e-19	2.09799	2.65785e-21	TRUE	TRUE	0.769444	0.277398	0.232114	FALSE	FALSE	Has domain(s) with predicted metallopeptidase activity	7.01495e-07	-1.81388	4.34827e-09	TRUE	FALSE	181	15.4243	403	23.1603	109	13.9011	133	13.6621	211	14.9716	146	10.2159	69	3.65053	131	7.38939	111	4.62602	1351	GO:0005575	cellular_component	unknown	Has domain(s) with predicted metallopeptidase activity
CADANIAG00002802	ANIA_11601	V	161816	162137	-1	162137	161816		hypothetical protein	protein_coding	2.63884e-07	2.07046	1.84942e-08	TRUE	TRUE	0.947725	0.205794	0.681975	FALSE	FALSE	ORF, Deleted	0.00387695	-1.83862	0.000159482	TRUE	FALSE	14662	1249.46	29248	1680.87	10338	1318.43	11858	1218.08	23134	1641.48	15950	1116.05	8036	425.155	11741	662.281	12416	517.447	8566			unknown	ORF, Deleted
CADANIAG00002298	ANIA_00401	VIII	3619012	3620474	-1	3620474	3619012		conserved hypothetical protein	protein_coding	2.77448e-18	2.05125	3.15744e-20	TRUE	TRUE	0.947725	0.133725	0.683976	FALSE	FALSE	protein of unknown function	2.1642e-08	-1.91267	9.0246e-11	TRUE	FALSE	334	28.4626	525	30.1716	279	35.5817	209	21.469	744	52.7908	474	33.1667	243	12.8562	302	17.0351	327	13.628	8307	GO:0005575	cellular_component	unknown
CADANIAG00006514	ANIA_06460	I	103139	104328	-1	104328	103139		conserved hypothetical protein	protein_coding	1.1519e-14	2.26281	2.05071e-16	TRUE	TRUE	0.806073	0.334496	0.296889	FALSE	FALSE	protein of unknown function	0.000236093	-1.92466	4.57658e-06	TRUE	FALSE	120	10.2261	259	14.8846	75	9.56496	58	5.95789	168	11.9205	94	6.57736	57	3.01566	75	4.23056	68	2.83396	5437	GO:0005575	cellular_component	unknown
CADANIAG00001727	ANIA_00928	VIII	1995336	1997159	1	1995336	1997159		Putative Zn(II)2Cys6 transcription factor (Eurofung)	protein_coding	7.59495e-33	2.226	2.73846e-35	TRUE	TRUE	0.751511	0.295544	0.179129	FALSE	FALSE	Ortholog(s) have role in conidiophore development	5.82815e-12	-1.92676	1.18231e-14	TRUE	FALSE	544	46.3582	815	46.8377	413	52.6711	269	27.6323	1096	77.7671	714	49.96	425	22.4852	379	21.3785	479	19.9627	8992			Development	Ortholog(s) have role in conidiophore development
CADANIAG00002583	ANIA_10024	VIII	4369647	4371118	1	4369647	4371118		extracellular salicylate hydroxylase/monooxygenase, putative (AFU_orthologue; AFUA_4G13860)	protein_coding	0.0497424	1.14562	0.0239716	TRUE	FALSE	0.742426	-0.858206	0.145652	FALSE	FALSE	Has domain(s) with predicted FAD binding, oxidoreductase activity and role in metabolic process	0.000819269	-1.96861	2.27139e-05	TRUE	FALSE	224	19.0887	637	36.6082	177	22.5733	240	24.6534	257	18.2355	264	18.4726	108	5.71388	181	10.2098	221	9.21037	6219	GO:0016491; GO:0005575	oxidoreductase activity; cellular_component	unknown
CADANIAG00006395	ANIA_11094	III	3195929	3197209	-1	3197209	3195929		hypothetical oxidoreductase (Eurofung)	protein_coding	4.22746e-40	2.26204	1.0003e-42	TRUE	TRUE	0.742234	0.289047	0.139269	FALSE	FALSE	Putative zinc-binding oxidoreductase; intracellular, menadione stress-induced protein; expression upregulated after exposure to farnesol	7.4737e-15	-1.97083	6.73838e-18	TRUE	FALSE	195	16.6174	400	22.9879	149	19.0024	145	14.8947	504	35.7615	316	22.1111	150	7.93594	203	11.4507	255	10.6273	10470	GO:0016491; GO:0055114; GO:0005622; GO:0000166	oxidoreductase activity; oxidation-reduction process; intracellular; nucleotide binding	Response to other stresses	Putative zinc-binding oxidoreductase; intracellular, menadione stress-induced protein; expression upregulated after exposure to farnesol
CADANIAG00002832	ANIA_08365	V	231677	234335	-1	234335	231677		MFS siderochrome iron transporter MirB (AFU_orthologue; AFUA_3G03640)	protein_coding	2.72944e-16	2.01844	3.99806e-18	TRUE	TRUE	1	0.0217944	0.980371	FALSE	FALSE	Has domain(s) with predicted role in transmembrane transport and integral component of membrane localization	0.00581882	-1.97094	0.000278711	TRUE	FALSE	767	65.3616	822	47.24	515	65.6794	354	36.3637	1482	105.156	611	42.7529	560	29.6275	387	21.8297	606	25.2556	6188			Transmembrane transport
CADANIAG00000454	ANIA_07021	IV	1285965	1287224	-1	1287224	1285965		conserved hypothetical protein	protein_coding	0.00201599	1.71436	0.00055062	TRUE	FALSE	0.908658	-0.339181	0.559712	FALSE	FALSE	protein of unknown function	0.0478027	-2.01397	0.00489179	TRUE	TRUE	53	4.51651	80	4.59757	26	3.31585	39	4.00617	81	5.74738	38	2.65893	30	1.58719	26	1.4666	50	2.08379	8328	GO:0005575	cellular_component	unknown
CADANIAG00009031	ANIA_02336	VII	3539831	3541264	-1	3541264	3539831		hypothetical protein similar to phospholipase C PLC-C (Eurofung)	protein_coding	4.70858e-34	2.29836	1.64469e-36	TRUE	TRUE	0.751511	0.27178	0.166938	FALSE	FALSE	Putative phospholipase C	8.0608e-11	-2.01936	2.08947e-13	TRUE	TRUE	351	29.9113	1018	58.5041	348	44.3814	244	25.0642	481	34.1295	467	32.6769	195	10.3167	271	15.2864	308	12.8362	385	GO:0005575	cellular_component	other
CADANIAG00001122	ANIA_09338	VIII	326453	328241	1	326453	328241		L-PSP endoribonuclease family protein, putative (AFU_orthologue; AFUA_4G03420)	protein_coding	4.5219e-09	2.01738	2.05332e-10	TRUE	TRUE	1	-0.00559403	1	FALSE	FALSE	Endoribonuclease L-PSP	4.71659e-06	-2.01978	4.09306e-08	TRUE	TRUE	2252	191.909	5601	321.887	1600	204.053	2124	218.182	2174	154.257	2590	181.227	1270	67.1909	1528	86.1907	1878	78.2673	7304	GO:0005575	cellular_component	Nucleotide metabolism
CADANIAG00003715	ANIA_05378	V	2740926	2743468	-1	2743468	2740926		siderochrome-iron transporter Sit1, putative (AFU_orthologue; AFUA_7G06060)	protein_coding	3.73845e-30	2.39783	1.64281e-32	TRUE	TRUE	0.785472	0.357566	0.259444	FALSE	FALSE	MFS general substrate transporter	1.99334e-07	-2.03152	9.92447e-10	TRUE	TRUE	16	1.36348	38	2.18385	19	2.42312	9	0.924501	27	1.91579	30	2.09916	14	0.740688	9	0.507668	20	0.833517	3380			Transmembrane transport
CADANIAG00002944	ANIA_08459	V	552156	553948	-1	553948	552156		MFS multidrug transporter, putative (AFU_orthologue; AFUA_1G16910)	protein_coding	0.00474541	2.68892	0.00148324	TRUE	TRUE	0.842837	0.657781	0.389317	FALSE	FALSE	Ortholog(s) have role in arginine transport, gliotoxin biosynthetic process and plasma membrane localization	0.00235116	-2.03849	8.45285e-05	TRUE	TRUE	130	11.0782	186	10.6894	91	11.6055	168	17.2573	203	14.4039	177	12.385	93	4.92028	125	7.05094	155	6.45976	2058			Secondary metabolism	Ortholog(s) have role in arginine transport, gliotoxin biosynthetic process and plasma membrane localization; zitiert in Transcriptional changes in the transition from vegetative cells to asexual development in the model fungus Aspergillus nidulans.
CADANIAG00007900	ANIA_08958	VII	292709	293584	-1	293584	292709		conserved hypothetical protein	protein_coding	3.21911e-05	2.02832	4.43602e-06	TRUE	TRUE	1	-0.0320185	0.921514	FALSE	FALSE	protein of unknown function	0.00491553	-2.0473	0.000222703	TRUE	TRUE	157	13.3791	349	20.0569	141	17.9821	103	10.5804	259	18.3774	189	13.2247	89	4.70866	152	8.57394	109	4.54267	9144	GO:0005575	cellular_component	unknown
CADANIAG00001167	ANIA_09380	VIII	459337	460395	-1	460395	459337		polysaccharide deacetylase family protein (AFU_orthologue; AFUA_4G09940)	protein_coding	5.926e-16	1.91159	8.94742e-18	TRUE	FALSE	0.967247	-0.132343	0.782804	FALSE	FALSE	ascospore wall assembly	0.000378676	-2.04903	8.49279e-06	TRUE	TRUE	35	2.9826	83	4.76998	32	4.08105	39	4.00617	40	2.83821	28	1.95921	22	1.16394	25	1.41019	26	1.08357	4016	GO:0005575	cellular_component	Development	ascospore wall assembly
CADANIAG00000236	ANIA_07214	IV	660055	661487	-1	661487	660055		NADPH-dependent FMN reductase Lot6, putative (AFU_orthologue; AFUA_7G06600)	protein_coding	0.00058883	2.29859	0.00013004	TRUE	TRUE	0.811701	0.218482	0.312539	FALSE	FALSE	protein of unknown function	0.00269447	-2.08061	0.00010173	TRUE	TRUE	3739	318.627	7272	417.919	2544	324.444	3335	342.579	4615	327.459	3808	266.453	2281	120.679	2558	144.29	3111	129.654	8501			unknown
CADANIAG00007592	ANIA_06796	I	3145779	3146658	-1	3146658	3145779		ThiJ/PfpI family protein (AFU_orthologue; AFUA_5G01430)	protein_coding	2.29767e-17	2.36292	2.97726e-19	TRUE	TRUE	0.794362	0.251394	0.269699	FALSE	FALSE	protein of unknown function	4.01391e-10	-2.11105	1.26665e-12	TRUE	TRUE	1826	155.607	3608	207.35	1433	182.755	1086	111.556	2765	196.192	1942	135.886	1010	53.4353	1287	72.5965	1468	61.1802	7809	GO:0005622	intracellular	unknown
CADANIAG00007083	ANIA_05945	I	1713939	1715343	1	1713939	1715343		conserved hypothetical protein	protein_coding	8.49936e-26	2.20574	4.88414e-28	TRUE	TRUE	0.969681	0.0869881	0.792241	FALSE	FALSE	protein of unknown function	2.99438e-06	-2.112	2.32855e-08	TRUE	TRUE	121	10.3113	166	9.53996	67	8.5447	98	10.0668	165	11.7076	109	7.62694	61	3.22728	98	5.52794	88	3.66748	10853	GO:0005575	cellular_component	unknown
CADANIAG00009444	ANIA_09158	VI	248635	249391	-1	249391	248635		short chain dehydrogenase, putative (AFU_orthologue; AFUA_4G01040)	protein_coding	3.75345e-17	2.36825	5.11738e-19	TRUE	TRUE	0.869463	0.203525	0.460816	FALSE	FALSE	Has domain(s) with predicted oxidoreductase activity and role in metabolic process	3.7067e-06	-2.15413	2.96603e-08	TRUE	TRUE	28	2.38608	77	4.42516	25	3.18832	27	2.7735	38	2.6963	25	1.7493	20	1.05813	16	0.90252	25	1.0419	7533	GO:0016491; GO:0005575; GO:0000166	oxidoreductase activity; cellular_component; nucleotide binding	unknown
CADANIAG00004522	ANIA_04151	II	1880464	1882093	1	1880464	1882093		steroid monooxygenase, putative (AFU_orthologue; AFUA_8G00440)	protein_coding	1.86234e-05	2.09485	2.31245e-06	TRUE	TRUE	1	-0.0244951	1	FALSE	FALSE	Pyridine nucleotide-disulphide oxidoreductase	0.0224999	-2.16228	0.00167614	TRUE	TRUE	5417	461.622	11093	637.511	2940	374.947	5916	607.705	5444	386.281	5133	359.166	2887	152.74	3954	223.035	4711	196.335	1182	GO:0005575	cellular_component	other
CADANIAG00004715	ANIA_03974	II	2403893	2404912	-1	2404912	2403893		conserved hypothetical protein	protein_coding	0.0177797	1.53625	0.00710986	TRUE	FALSE	0.847509	-0.58166	0.402634	FALSE	FALSE	protein of unknown function	0.00539795	-2.1632	0.000253685	TRUE	TRUE	50	4.26086	82	4.71251	33	4.20858	23	2.36261	59	4.18637	41	2.86885	21	1.11103	22	1.24097	39	1.62536	2249	GO:0005575	cellular_component	unknown
CADANIAG00005232	ANIA_03522	II	3845891	3847176	-1	3847176	3845891	fhbB	nitric oxide oxidoreductase (Eurofung)	protein_coding	0.00134465	1.65467	0.000339835	TRUE	FALSE	0.806073	-0.517206	0.295585	FALSE	FALSE	Flavohemoprotein, involved (with FhbA) in sterigmatocystin production	0.000615759	-2.17453	1.62389e-05	TRUE	TRUE	66	5.62434	65	3.73553	44	5.61145	34	3.49256	81	5.74738	47	3.28868	29	1.53428	22	1.24097	60	2.50055	2496	GO:0055114	oxidation-reduction process	Secondary metabolism	Flavohemoprotein, involved (with FhbA) in sterigmatocystin production
CADANIAG00009294	ANIA_02561	VII	4306419	4307587	1	4306419	4307587		conserved hypothetical protein	protein_coding	7.11119e-07	2.28269	5.73703e-08	TRUE	TRUE	0.997531	0.0586823	0.901906	FALSE	FALSE	Putative methyltransferase; intracellular, menadione stress-induced protein	0.00420655	-2.21451	0.00017873	TRUE	TRUE	32	2.72695	85	4.88492	22	2.80572	50	5.13612	79	5.60547	50	3.4986	46	2.43369	28	1.57941	48	2.00044	5028	GO:0005622	intracellular	Oxidative stress response	Putative methyltransferase; intracellular, menadione stress-induced protein
CADANIAG00004525	ANIA_04148	II	1888576	1890547	-1	1890547	1888576	xtrE	MFS monosaccharide transporter, putative (AFU_orthologue; AFUA_4G13080)	protein_coding	2.42975e-17	2.50531	3.17579e-19	TRUE	TRUE	0.94998	0.293526	0.69355	FALSE	FALSE	Putative xylose transporter	0.0224999	-2.2159	0.00167414	TRUE	TRUE	58	4.9426	91	5.22974	18	2.29559	44	4.51978	38	2.6963	79	5.52778	25	1.32266	47	2.65115	35	1.45866	8897			Transmembrane transport
CADANIAG00008197	ANIA_01567	VII	1144388	1145121	1	1144388	1145121		MBL2-like secreted peptide, putative (AFU_orthologue; AFUA_5G00910)	protein_coding	0.133975	1.29096	0.0795549	FALSE	FALSE	0.742426	-0.982126	0.150788	FALSE	FALSE	protein of unknown function	0.0208992	-2.24389	0.00150864	TRUE	TRUE	70	5.96521	241	13.8502	62	7.90704	100	10.2722	51	3.61872	87	6.08756	44	2.32788	68	3.83571	56	2.33385	70	GO:0005575	cellular_component	unknown
CADANIAG00003766	ANIA_05330	V	2871343	2871904	1	2871343	2871904		GNAT family N-acetyltransferase, putative (AFU_orthologue; AFUA_6G03350)	protein_coding	5.44603e-10	2.50961	2.07409e-11	TRUE	TRUE	0.941102	0.223392	0.665911	FALSE	FALSE	Has domain(s) with predicted N-acetyltransferase activity	0.00140693	-2.27753	4.51905e-05	TRUE	TRUE	22	1.87478	8	0.459757	10	1.27533	13	1.33539	30	2.12866	17	1.18952	15	0.793594	12	0.67689	13	0.541786	5399	GO:0005575	cellular_component	unknown
CADANIAG00002297	ANIA_00402	VIII	3617728	3618857	-1	3618857	3617728		hypothetical protein	protein_coding	3.59407e-18	2.23858	4.29263e-20	TRUE	TRUE	0.981558	-0.0618473	0.843387	FALSE	FALSE	protein of unknown function	8.91998e-07	-2.30247	5.87976e-09	TRUE	TRUE	154	13.1235	376	21.6086	127	16.1967	110	11.2995	203	14.4039	160	11.1955	58	3.06856	121	6.82531	142	5.91797	6231	GO:0005575	cellular_component	unknown
CADANIAG00002642	ANIA_00107	VIII	4536324	4537308	-1	4537308	4536324		conserved hypothetical protein	protein_coding				FALSE	FALSE	0.732639	-1.39139	0.0919906	FALSE	FALSE	protein of unknown function	0.0444824	-2.31656	0.00442984	TRUE	TRUE	13	1.10782	60	3.44818	19	2.42312	24	2.46534	32	2.27057	36	2.51899	23	1.21684	16	0.90252	24	1.00022	5164	GO:0005575	cellular_component	unknown
CADANIAG00001863	ANIA_00798	VIII	2395065	2396138	-1	2396138	2395065		conserved hypothetical protein	protein_coding	7.9315e-06	1.94416	8.63305e-07	TRUE	FALSE	0.800497	-0.377081	0.283134	FALSE	FALSE	protein of unknown function	0.000559248	-2.31931	1.41183e-05	TRUE	TRUE	1358	115.725	3453	198.443	1147	146.28	906	93.0664	1863	132.19	1885	131.897	670	35.4472	1123	63.3457	1362	56.7625	10655	GO:0005575	cellular_component	unknown
CADANIAG00010398	ANIA_02717	VI	2994103	2997994	1	2994103	2997994	rrpC	RNA-directed RNA polymerase (Sad-1), putative (AFU_orthologue; AFUA_3G06790)	protein_coding	0.00133721	3.62435	0.000337052	TRUE	TRUE	0.782898	1.26522	0.251735	FALSE	FALSE		0.0299604	-2.3372	0.00256915	TRUE	TRUE	60	5.11304	118	6.78142	62	7.90704	47	4.82795	135	9.57897	72	5.03798	42	2.22206	67	3.7793	61	2.54223	2382	GO:0005575	cellular_component	other
CADANIAG00001968	ANIA_10109	VIII	2695359	2696140	-1	2696140	2695359		conserved hypothetical protein	protein_coding	3.16973e-15	2.9711	5.35729e-17	TRUE	TRUE	0.839713	0.592709	0.371912	FALSE	FALSE	protein of unknown function	0.022242	-2.35188	0.00164544	TRUE	TRUE	45	3.83478	136	7.81587	26	3.31585	87	8.93684	62	4.39923	67	4.68812	51	2.69822	50	2.82038	55	2.29217	10326	GO:0005575	cellular_component	unknown
CADANIAG00006497	ANIA_06470	I	51785	52575	-1	52575	51785		N,O-diacetyl muramidase, putative (AFU_orthologue; AFUA_6G10130)	protein_coding	0.000243066	2.16026	4.67782e-05	TRUE	TRUE	0.922137	-0.250767	0.604615	FALSE	FALSE	Protein with lysozyme activity, involved in carbohydrate catabolism	0.00978136	-2.38119	0.000569927	TRUE	TRUE	2422	206.396	2502	143.789	1364	173.955	1875	192.604	2014	142.904	2815	196.971	1700	89.9406	1284	72.4273	1716	71.5158	2811	GO:0009253; GO:0003796; GO:0005575	peptidoglycan catabolic process; lysozyme activity; cellular_component	Carbon metabolism
CADANIAG00008856	ANIA_02177	VII	3059492	3060966	1	3059492	3060966		short chain dehydrogenase/oxidoreductase, putative (AFU_orthologue; AFUA_2G15740)	protein_coding	1.01311e-31	2.37955	3.99536e-34	TRUE	TRUE	1	-0.0224297	0.968598	FALSE	FALSE	Has domain(s) with predicted oxidoreductase activity and role in metabolic process	0.00034955	-2.39176	7.76078e-06	TRUE	TRUE	49	4.17565	34	1.95397	23	2.93326	24	2.46534	44	3.12203	37	2.58896	29	1.53428	26	1.4666	16	0.666814	2849	GO:0016491; GO:0005575; GO:0000166	oxidoreductase activity; cellular_component; nucleotide binding	unknown
CADANIAG00003725	ANIA_05368	V	2767615	2768401	-1	2768401	2767615		short chain dehydrogenase, putative (AFU_orthologue; AFUA_4G00440)	protein_coding	4.36935e-05	2.36304	6.29413e-06	TRUE	TRUE	1	-0.0932185	0.948571	FALSE	FALSE	Has domain(s) with predicted oxidoreductase activity and role in metabolic process	0.0312856	-2.39425	0.00272238	TRUE	TRUE	32996	2811.83	64789	3723.4	22582	2879.95	20791	2135.7	45737	3245.28	33803	2365.26	16861	892.052	25874	1459.49	26033	1084.95	1426	GO:0016491; GO:0005575; GO:0000166	oxidoreductase activity; cellular_component; nucleotide binding	unknown
CADANIAG00009077	ANIA_02374	VII	3668086	3669138	-1	3669138	3668086		conserved hypothetical protein	protein_coding	3.33897e-06	2.57107	3.20917e-07	TRUE	TRUE	0.952834	0.158494	0.708229	FALSE	FALSE	Has domain(s) with predicted oxidoreductase activity and role in metabolic process	0.00212713	-2.41178	7.43163e-05	TRUE	TRUE	116	9.8852	160	9.19514	64	8.1621	67	6.8824	166	11.7786	75	5.2479	87	4.60284	54	3.04601	72	3.00066	8937	GO:0016491; GO:0005575; GO:0000166	oxidoreductase activity; cellular_component; nucleotide binding	unknown	Has domain(s) with predicted oxidoreductase activity and role in metabolic process
CADANIAG00010164	ANIA_02924	VI	2329164	2332712	1	2329164	2332712		NRPS-like enzyme, putative (JCVI)	protein_coding	0.000710467	1.49158	0.000162267	TRUE	FALSE	0.812741	-0.95993	0.314738	FALSE	FALSE	Putative nonribosomal peptide synthetase (NRPS)-like enzyme	0.0478787	-2.47575	0.00492115	TRUE	TRUE	1467	125.014	3444	197.925	965	123.069	1297	133.231	2451	173.912	1861	130.218	1055	55.8161	1357	76.545	1505	62.7222	4042	GO:0005575; GO:0000166	cellular_component; nucleotide binding	Secondary metabolism
CADANIAG00001100	ANIA_09320	VIII	268614	271823	-1	271823	268614		conserved hypothetical protein	protein_coding	2.08522e-11	1.95568	6.15581e-13	TRUE	FALSE	0.842837	-0.534115	0.393267	FALSE	FALSE	protein of unknown function	0.00730161	-2.49059	0.000370306	TRUE	TRUE	61	5.19825	102	5.8619	50	6.37664	59	6.06062	71	5.03783	84	5.87764	46	2.43369	52	2.93319	53	2.20882	4072	GO:0005575	cellular_component	unknown	Has domain(s) with predicted oxidoreductase activity and role in oxidation-reduction process
CADANIAG00009229	ANIA_02504	VII	4100058	4101512	-1	4101512	4100058		conserved hypothetical protein	protein_coding	2.0667e-07	2.39335	1.41118e-08	TRUE	TRUE	0.9863	-0.121985	0.862861	FALSE	FALSE	Has domain(s) with predicted oxidoreductase activity and role in oxidation-reduction process	0.0100943	-2.5025	0.00059954	TRUE	TRUE	29	2.4713	119	6.83889	15	1.91299	29	2.97895	30	2.12866	48	3.35865	21	1.11103	24	1.35378	31	1.29195	9180	GO:0016491; GO:0055114; GO:0005575	oxidoreductase activity; oxidation-reduction process; cellular_component	unknown
CADANIAG00005861	ANIA_04576	III	1617434	1618958	-1	1618958	1617434		monooxygenase, putative (AFU_orthologue; AFUA_2G01950)	protein_coding	6.92905e-09	2.0643	3.2791e-10	TRUE	TRUE	0.857814	-0.437667	0.428414	FALSE	FALSE	Has domain(s) with predicted FAD binding, oxidoreductase activity and role in metabolic process	0.000332961	-2.52711	7.16731e-06	TRUE	TRUE	64	5.4539	132	7.58599	43	5.48391	65	6.67695	85	6.0312	65	4.54818	47	2.48659	58	3.27164	47	1.95877	7994	GO:0016491; GO:0005575	oxidoreductase activity; cellular_component	unknown
CADANIAG00000910	ANIA_07772	IV	2595366	2597149	1	2595366	2597149	CYP5080B1	cytochrome P450, putative (Eurofung)	protein_coding	1.40414e-19	2.78963	1.45556e-21	TRUE	TRUE	0.818358	0.254678	0.326285	FALSE	FALSE	Putative cytochrome P450	3.66329e-09	-2.53217	1.40372e-11	TRUE	TRUE	61	5.19825	136	7.81587	72	9.18237	38	3.90345	172	12.2043	93	6.50739	66	3.49181	57	3.21523	84	3.50077	6840	GO:0016491; GO:0055114; GO:0005575	oxidoreductase activity; oxidation-reduction process; cellular_component	Respiratory chain
CADANIAG00001486	ANIA_01142	VIII	1347597	1349518	1	1347597	1349518		isoamyl alcohol oxidase, putative (AFU_orthologue; AFUA_7G00940)	protein_coding	7.10851e-13	1.99968	1.60993e-14	TRUE	FALSE	0.905992	-0.542615	0.545759	FALSE	FALSE	Has domain(s) with predicted UDP-N-acetylmuramate dehydrogenase activity, flavin adenine dinucleotide binding, oxidoreductase activity and role in oxidation-reduction process	0.0428588	-2.56899	0.0041202	TRUE	TRUE	961	81.8938	1757	100.974	880	112.229	483	49.6149	1176	83.4435	788	55.1379	376	19.8928	666	37.5674	657	27.381	768	GO:0055114; GO:0005575	oxidation-reduction process; cellular_component	unknown
CADANIAG00006379	ANIA_08666	III	3145171	3146402	-1	3146402	3145171		Putative Zn(II)2Cys6 transcription factor (Eurofung)	protein_coding				FALSE	FALSE	0.732639	-1.38977	0.0416701	FALSE	FALSE	Fungal Zn(2)-Cys(6) binuclear cluster domain	0.00499021	-2.60678	0.000230023	TRUE	TRUE	17	1.44869	147	8.44804	31	3.95352	19	1.95172	47	3.3349	62	4.33826	21	1.11103	29	1.63582	39	1.62536	1023			Transcription factor
CADANIAG00004191	ANIA_08155	II	935066	936154	-1	936154	935066		conserved hypothetical protein	protein_coding	3.01017e-09	2.91492	1.33974e-10	TRUE	TRUE	0.906216	0.245906	0.547167	FALSE	FALSE	Has domain(s) with predicted oxidoreductase activity and role in metabolic process	0.000390409	-2.65373	8.94733e-06	TRUE	TRUE	115	9.79998	191	10.9767	66	8.41717	136	13.9702	137	9.72088	118	8.25669	90	4.76156	84	4.73823	115	4.79272	5111	GO:0016491; GO:0005575; GO:0000166	oxidoreductase activity; cellular_component; nucleotide binding	unknown	Has domain(s) with predicted oxidoreductase activity and role in metabolic process
CADANIAG00007921	ANIA_08941	VII	367223	370103	-1	370103	367223		P-type ATPase, putative (Eurofung)	protein_coding	0.00903966	1.15111	0.00317789	TRUE	FALSE	0.732639	-1.43801	0.0936505	FALSE	FALSE	Putative potassium-transporting ATPase (alpha 1 isoform) with a predicted role in energy metabolism	0.0248252	-2.65816	0.00196128	TRUE	TRUE	466	39.7112	1111	63.8488	455	58.0275	204	20.9554	643	45.6243	568	39.7441	233	12.3272	374	21.0964	353	14.7116	5527			Transmembrane transport
CADANIAG00005222	ANIA_03529	II	3817501	3818399	1	3817501	3818399		conserved hypothetical protein	protein_coding	2.38789e-16	2.67764	3.47084e-18	TRUE	TRUE	1	0.00964001	0.993051	FALSE	FALSE	protein of unknown function	0.0226234	-2.66526	0.00170064	TRUE	TRUE	1282	109.249	1522	87.4688	829	105.725	547	56.1891	1153	81.8115	1405	98.3106	731	38.6745	579	32.66	865	36.0496	10988	GO:0005575	cellular_component	unknown
CADANIAG00006606	ANIA_06378	I	366477	367580	-1	367580	366477		conserved hypothetical protein	protein_coding	0.00152949	2.59092	0.000394651	TRUE	TRUE	1	-0.0874468	1	FALSE	FALSE	protein of unknown function	0.00489878	-2.67703	0.00022121	TRUE	TRUE	38	3.23826	69	3.9654	28	3.57092	43	4.41706	52	3.68968	54	3.77849	30	1.58719	38	2.14349	40	1.66703	3181	GO:0005575	cellular_component	unknown
CADANIAG00002496	ANIA_00230	VIII	4154091	4154900	-1	4154900	4154091		conserved hypothetical protein	protein_coding	3.25446e-10	3.60704	1.19911e-11	TRUE	TRUE	0.732639	0.865002	0.0808367	FALSE	FALSE	protein of unknown function	0.000323648	-2.7651	6.89389e-06	TRUE	TRUE	2744	233.836	5404	310.566	2159	275.343	1735	178.223	4100	290.917	2785	194.872	1423	75.2856	2148	121.163	2552	106.357	10004	GO:0005575	cellular_component	unknown
CADANIAG00008712	ANIA_02043	VII	2627341	2629241	-1	2629241	2627341		GABA transporter, putative (Eurofung)	protein_coding	1.6189e-21	2.5671	1.3316e-23	TRUE	TRUE	0.952834	-0.349596	0.703937	FALSE	FALSE	Has domain(s) with predicted amino acid transmembrane transporter activity, role in amino acid transmembrane transport and membrane localization	0.0241027	-2.91782	0.00186618	TRUE	TRUE	840	71.5825	1824	104.825	748	95.3946	482	49.5122	1093	77.5542	940	65.7736	390	20.6334	606	34.183	798	33.2573	1304			Transmembrane transport
CADANIAG00007887	ANIA_08969	VII	262324	263196	1	262324	263196		conserved hypothetical protein	protein_coding	0.0566137	2.02686	0.0280944	FALSE	FALSE	0.790476	-0.929149	0.263289	FALSE	FALSE	Has domain(s) with predicted lysozyme activity and role in carbohydrate metabolic process, cell wall macromolecule catabolic process, peptidoglycan catabolic process	0.00284421	-2.92105	0.000108345	TRUE	TRUE	64	5.4539	101	5.80443	34	4.33612	64	6.57423	62	4.39923	55	3.84846	41	2.16916	54	3.04601	37	1.54201	1692	GO:0009253; GO:0003796; GO:0005575	peptidoglycan catabolic process; lysozyme activity; cellular_component	unknown	Has domain(s) with predicted lysozyme activity and role in carbohydrate metabolic process, cell wall macromolecule catabolic process, peptidoglycan catabolic process
CADANIAG00004892	ANIA_03820	II	2899664	2900853	1	2899664	2900853		hypothetical protein	protein_coding	2.8213e-17	2.82058	3.71935e-19	TRUE	TRUE	0.997106	-0.0868329	0.900932	FALSE	FALSE	protein of unknown function	0.000150985	-2.92817	2.67156e-06	TRUE	TRUE	233	19.8556	510	29.3095	135	17.2169	279	28.6595	246	17.455	270	18.8924	201	10.6342	192	10.8302	197	8.21014	6909	GO:0005575	cellular_component	unknown
CADANIAG00003741	ANIA_05353	V	2808596	2809368	1	2808596	2809368		conserved hypothetical protein	protein_coding	4.5268e-05	2.77708	6.5951e-06	TRUE	TRUE	0.977883	-0.171107	0.831044	FALSE	FALSE	Transcript repressed by light in developmentally competent mycelia	0.000332961	-2.94542	7.15548e-06	TRUE	TRUE	510	43.4608	590	33.9071	337	42.9786	311	31.9466	686	48.6754	427	29.878	322	17.0358	339	19.1222	350	14.5866	4274	GO:0005575	cellular_component	unknown	Transcript repressed by light in developmentally competent mycelia
CADANIAG00009802	ANIA_11381	VI	1266746	1267019	-1	1267019	1266746		hypothetical protein	protein_coding	1.18979e-09	2.75747	4.87982e-11	TRUE	TRUE	0.958733	-0.176625	0.741888	FALSE	FALSE	ORF, Deleted,	3.06798e-05	-2.94965	4.14918e-07	TRUE	TRUE	13	1.10782	22	1.26433	10	1.27533	14	1.43811	22	1.56102	21	1.46941	13	0.687781	8	0.45126	21	0.875193	10855			unknown	ORF, Deleted,
CADANIAG00010356	ANIA_02755	VI	2856504	2858542	-1	2858542	2856504	MAT1	Alpha-domain mating-type protein MAT1 (Eurofung)	protein_coding				FALSE	FALSE	0.854012	-1.01239	0.420424	FALSE	FALSE	Mating-type protein MAT alpha 1 HMG-box		-2.99042	0.00266935	TRUE	TRUE	88	7.49912	151	8.67791	57	7.26937	85	8.7314	123	8.72751	78	5.45781	70	3.70344	69	3.89212	71	2.95899	3682			Development
CADANIAG00000380	ANIA_07087	IV	1065741	1066563	-1	1066563	1065741		conserved hypothetical protein	protein_coding				FALSE	FALSE	0.96177	-0.384279	0.750712	FALSE	FALSE	protein of unknown function	0.00757306	-3.14868	0.000394127	TRUE	TRUE	23	1.96	40	2.29879	10	1.27533	25	2.56806	46	3.26395	31	2.16913	23	1.21684	25	1.41019	26	1.08357	5027			unknown
CADANIAG00002019	ANIA_00656	VIII	2821261	2822238	-1	2822238	2821261		conserved hypothetical protein	protein_coding	8.80477e-05	1.98099	1.41868e-05	TRUE	FALSE	0.732639	-1.21045	0.0458471	FALSE	FALSE	Methyltransferase domain	0.000462569	-3.15244	1.12606e-05	TRUE	TRUE	516	43.9721	790	45.401	299	38.1323	439	45.0951	661	46.9015	452	31.6273	344	18.1998	459	25.8911	313	13.0445	5383	GO:0005575	cellular_component	unknown	Protein expressed at increased levels during osmoadaptation; contains conserved UbiE, methylase domain involved in ubiquinone/menaquinone biosynthesis
CADANIAG00009844	ANIA_03218	VI	1379476	1380250	-1	1380250	1379476		conserved hypothetical protein	protein_coding	2.45628e-08	2.81073	1.29249e-09	TRUE	TRUE	0.841091	-0.533207	0.37969	FALSE	FALSE	protein of unknown function	0.00347199	-3.26281	0.000139693	TRUE	TRUE	20	1.70435	24	1.37927	11	1.40286	19	1.95172	37	2.62535	28	1.95921	12	0.634875	24	1.35378	25	1.0419	4270	GO:0005575	cellular_component	unknown
CADANIAG00002443	ANIA_00279	VIII	4004749	4006001	1	4004749	4006001	flbD	Myb-like DNA binding domain transcription factor, FlbD, involved in conidiophore development (Eurofung)	protein_coding	1.26472e-28	3.74284	5.98516e-31	TRUE	TRUE	0.843756	0.404552	0.394522	FALSE	FALSE	Putative transcription factor involved in regulation of asexual and sexual development and in response to nitrogen starvation	1.93716e-09	-3.34352	6.76795e-12	TRUE	TRUE	251	21.3895	471	27.0682	163	20.7879	232	23.8316	264	18.7322	269	18.8225	166	8.78244	217	12.2404	184	7.66836	6618			Development
CADANIAG00006942	ANIA_06075	I	1336185	1338385	-1	1338385	1336185		phenylalanine ammonia-lyase (AFU_orthologue; AFUA_2G09110)	protein_coding	3.86278e-32	3.34789	1.4363e-34	TRUE	TRUE	1	-0.0319575	0.95467	FALSE	FALSE	Has domain(s) with predicted ammonia-lyase activity, role in L-phenylalanine catabolic process, biosynthetic process and cytoplasm localization	3.69862e-05	-3.38104	5.25218e-07	TRUE	TRUE	132	11.2487	251	14.4249	98	12.4982	119	12.224	89	6.31503	122	8.53658	66	3.49181	91	5.13308	95	3.95921	17			Amino acid biosynthesis
CADANIAG00000191	ANIA_07251	IV	529152	530953	1	529152	530953		conserved hypothetical protein	protein_coding	1.06746e-24	3.30961	7.09635e-27	TRUE	TRUE	1	-0.090949	0.937513	FALSE	FALSE	Has domain(s) with predicted FAD binding, oxidoreductase activity and role in metabolic process	0.0332313	-3.42239	0.00299992	TRUE	TRUE	53	4.51651	73	4.19528	27	3.44339	49	5.03339	139	9.86279	58	4.05837	57	3.01566	57	3.21523	64	2.66726	484	GO:0016491; GO:0005575	oxidoreductase activity; cellular_component	unknown	Has domain(s) with predicted FAD binding, oxidoreductase activity and role in metabolic process
CADANIAG00008713	ANIA_02044	VII	2630878	2632487	1	2630878	2632487		conserved hypothetical protein	protein_coding	1.77176e-19	3.22409	1.89653e-21	TRUE	TRUE	0.973739	-0.23736	0.810687	FALSE	FALSE	protein of unknown function	0.0100622	-3.46522	0.000594231	TRUE	TRUE	304	25.906	644	37.0104	179	22.8284	356	36.5691	435	30.8656	342	23.9304	262	13.8614	267	15.0608	330	13.753	7181	GO:0005575	cellular_component	unknown
CADANIAG00005343	ANIA_05046	III	168818	169375	1	168818	169375	Anisin-1	conserved hypothetical protein	protein_coding	5.25898e-07	4.55595	4.02349e-08	TRUE	TRUE	0.779143	0.863007	0.247055	FALSE	FALSE	Anisin-1; secreted defensin-like peptide with a predicted role in defense response; high homology to the mosquito defensin AaDefA1	0.003202	-3.66332	0.000125583	TRUE	TRUE	2115	180.234	4412	253.556	2045	260.805	1428	146.687	3003	213.079	2572	179.968	1381	73.0635	1733	97.7542	2032	84.6854	8712	GO:0005575	cellular_component	Development	Anisin-1; secreted defensin-like peptide with a predicted role in defense response; high homology to the mosquito defensin AaDefA1
CADANIAG00007339	ANIA_06565	I	2420547	2421771	1	2420547	2421771		conserved hypothetical protein	protein_coding	6.03348e-07	2.46316	4.7588e-08	TRUE	TRUE	0.811701	-1.16458	0.313205	FALSE	FALSE	protein of unknown function	0.0236237	-3.70019	0.00181045	TRUE	TRUE	206	17.5548	328	18.85	125	15.9416	119	12.224	255	18.0936	178	12.455	99	5.23772	142	8.00987	172	7.16825	7122	GO:0005575	cellular_component	unknown
CADANIAG00003926	ANIA_07907	II	201392	201944	-1	201944	201392		conserved hypothetical protein	protein_coding				FALSE	FALSE	0.7546	-1.18648	0.196023	FALSE	FALSE	Putative glyoxylate-bleomycin resistance protein; member of the F9775 secondary metabolite gene cluster	0.00781803	-3.74811	0.000414119	TRUE	TRUE	77152	6574.68	165814	9529.27	59061	7532.22	43709	4489.89	104050	7382.9	84244	5894.72	43121	2281.37	62215	3509.39	64657	2694.64	10042	GO:0005575	cellular_component	Secondary metabolism	Putative glyoxylate-bleomycin resistance protein; member of the F9775 secondary metabolite gene cluster
CADANIAG00003671	ANIA_05420	V	2610699	2613997	-1	2613997	2610699		conserved hypothetical protein	protein_coding	4.60817e-07	3.71872	3.46846e-08	TRUE	TRUE	1	-0.0991414	0.964104	FALSE	FALSE	ORF, Deleted	0.025572	-3.76698	0.00204514	TRUE	TRUE	408	34.7686	698	40.1138	317	40.4279	414	42.527	392	27.8145	393	27.499	250	13.2266	339	19.1222	343	14.2948	6797			unknown	ORF, Deleted
CADANIAG00009436	ANIA_09165	VI	231317	233453	1	231317	233453		conserved hypothetical protein	protein_coding				FALSE	FALSE	0.827516	-0.689378	0.343913	FALSE	FALSE	Has domain(s) with predicted role in transmembrane transport and integral component of membrane localization	0.0011152	-3.7779	3.38546e-05	TRUE	TRUE	741	63.146	1240	71.2623	625	79.708	527	54.1347	1155	81.9534	912	63.8144	515	27.2467	684	38.5827	729	30.3817	4415			Transmembrane transport	Has domain(s) with predicted role in transmembrane transport and integral component of membrane localization
CADANIAG00007401	ANIA_06620	I	2599598	2600824	-1	2600824	2599598		endo-1,3(4)-beta-glucanase, putative (AFU_orthologue; AFUA_6G14540)	protein_coding	9.75969e-05	2.92298	1.60224e-05	TRUE	TRUE	0.829262	-0.944025	0.346776	FALSE	FALSE	Has domain(s) with predicted hydrolase activity, hydrolyzing O-glycosyl compounds activity and role in carbohydrate metabolic process	0.00922577	-3.86396	0.000529237	TRUE	TRUE	864	73.6277	1580	90.802	527	67.2098	668	68.6185	1091	77.4123	718	50.2399	603	31.9025	648	36.5521	623	25.9641	10015	GO:0005575	cellular_component	Carbon metabolism
CADANIAG00001547	ANIA_01087	VIII	1506400	1507986	1	1506400	1507986	CYP578B1	cytochrome P450 monooxygenase, putative (AFU_orthologue; AFUA_3G03930)	protein_coding	8.02286e-11	2.77847	2.62155e-12	TRUE	TRUE	0.830638	-1.09231	0.349533	FALSE	FALSE	Putative cytochrome P450	0.0224238	-3.89988	0.00166542	TRUE	TRUE	760	64.7651	1417	81.4345	540	68.8677	989	101.592	1141	80.96	958	67.0331	730	38.6216	748	42.1928	941	39.217	2914	GO:0055114; GO:0005575;	oxidation-reduction process; cellular_component	Respiratory chain
CADANIAG00006438	ANIA_08609	III	3322145	3323164	1	3322145	3323164		hypothetical protein	protein_coding	3.6475e-07	2.43105	2.63853e-08	TRUE	TRUE	0.732639	-1.50916	0.0623121	FALSE	FALSE	(GPI)-anchored protein	0.000856958	-3.94216	2.45314e-05	TRUE	TRUE	49	4.17565	68	3.90793	20	2.55066	53	5.44428	60	4.25732	42	2.93882	31	1.64009	44	2.48193	46	1.91709	6745	GO:0005575	cellular_component	unknown	(GPI)-anchored protein
CADANIAG00000935	ANIA_07795	IV	2659931	2662106	1	2659931	2662106	gprK	conserved hypothetical protein	protein_coding	5.04785e-18	4.07472	6.25649e-20	TRUE	TRUE	0.986307	0.0937882	0.863416	FALSE	FALSE	Putative heterotrimeric G-protein coupled receptor component	4.76401e-06	-3.97646	4.2416e-08	TRUE	TRUE	62	5.28347	123	7.06876	46	5.86651	65	6.67695	92	6.52789	65	4.54818	40	2.11625	69	3.89212	61	2.54223	7110	GO:0005575	cellular_component	other	Putative heterotrimeric G-protein coupled receptor component
CADANIAG00002854	ANIA_08383	V	304398	312132	-1	312132	304398	ausA	polyketide synthase, putative (JCVI)	protein_coding	1.20518e-08	4.3118	5.98857e-10	TRUE	TRUE	0.93945	0.310907	0.662624	FALSE	FALSE	Polyketide synthase (PKS)	0.000701102	-4.02529	1.87266e-05	TRUE	TRUE	396	33.746	750	43.1022	256	32.6484	210	21.5717	691	49.0301	431	30.1579	280	14.8138	322	18.1632	377	15.7118	3331	GO:0031177; GO:0005575	phosphopantetheine binding; cellular_component	Secondary metabolism
CADANIAG00006287	ANIA_08774	III	2791730	2793393	-1	2793393	2791730		C6 transcription factor, putative (AFU_orthologue; AFUA_3G03900)	protein_coding	1.48399e-34	4.26779	5.0163e-37	TRUE	TRUE	0.984589	0.094539	0.856785	FALSE	FALSE	Transcript induced in response to calcium dichloride in a CrzA-dependent manner	1.01809e-07	-4.19687	4.70433e-10	TRUE	TRUE	46	3.91999	48	2.75854	33	4.20858	25	2.56806	39	2.76726	29	2.02919	16	0.8465	28	1.57941	27	1.12525	7551			Transcription factor	Transcript induced in response to calcium dichloride in a CrzA-dependent manner
CADANIAG00009267	ANIA_02538	VII	4209376	4210832	1	4209376	4210832		hypothetical protein	protein_coding	4.73809e-05	2.55918	6.98835e-06	TRUE	TRUE	0.732639	-1.67299	0.104178	FALSE	FALSE	protein of unknown function	0.00692406	-4.22391	0.00034834	TRUE	TRUE	64	5.4539	66	3.793	31	3.95352	37	3.80073	82	5.81834	62	4.33826	40	2.11625	42	2.36912	55	2.29217	2941	GO:0005575	cellular_component	unknown
CADANIAG00001817	ANIA_00841	VIII	2253484	2254309	1	2253484	2254309		conserved hypothetical protein	protein_coding	2.13353e-11	4.21008	6.35193e-13	TRUE	TRUE	1	-0.0277178	1	FALSE	FALSE	protein of unknown function	0.000808187	-4.24515	2.21334e-05	TRUE	TRUE	70	5.96521	147	8.44804	34	4.33612	89	9.14229	87	6.17311	89	6.2275	66	3.49181	67	3.7793	74	3.08401	218	GO:0005575	cellular_component	unknown
CADANIAG00009313	ANIA_02578	VII	4356498	4357630	1	4356498	4357630		conserved hypothetical protein	protein_coding	1.28039e-77	5.33646	2.88538e-81	TRUE	TRUE	0.140168	1.05658	4.83337e-05	FALSE	FALSE	Has domain(s) with predicted peroxidase activity	1.19149e-12	-4.25337	1.87995e-15	TRUE	TRUE	175	14.913	335	19.2523	92	11.733	158	16.2301	198	14.0492	199	13.9244	111	5.87259	133	7.5022	190	7.91841	3653	GO:0004601; GO:0005575	peroxidase activity; cellular_component	unknown	Has domain(s) with predicted peroxidase activity
CADANIAG00001019	ANIA_09253	VIII	65835	67943	-1	67943	65835	CYP651A1, ausL	conserved hypothetical protein	protein_coding	6.03348e-07	4.80855	4.75543e-08	TRUE	TRUE	0.841091	0.510654	0.37781	FALSE	FALSE	Putative cytochrome P450	0.00061396	-4.29304	1.59839e-05	TRUE	TRUE	139	11.8452	179	10.2871	93	11.8606	294	30.2004	279	19.7965	213	14.904	193	10.2109	214	12.0712	217	9.04366	6744	GO:0055114; GO:0005575	oxidation-reduction process; cellular_component	Secondary metabolism	Putative cytochrome P450
CADANIAG00005364	ANIA_05028	III	235510	239716	-1	239716	235510	ppoC	hypothetical protein similar to fatty acid oxygenase (Eurofung)	protein_coding	1.61924e-16	3.94393	2.33535e-18	TRUE	TRUE	0.917201	-0.527791	0.585427	FALSE	FALSE	Fatty acid oxygenase that plays a role in oxylipin biosynthesis	0.000894708	-4.47263	2.57531e-05	TRUE	TRUE	266	22.6678	526	30.229	161	20.5328	232	23.8316	321	22.7767	278	19.4522	173	9.15278	205	11.5635	271	11.2942	197	GO:0055114; GO:0004601; GO:0031408; GO:0045460; GO:0005575	oxidation-reduction process; peroxidase activity; oxylipin biosynthetic process; sterigmatocystin metabolic process; cellular_component	Development
CADANIAG00004719	ANIA_10505	II	2412591	2413884	1	2412591	2413884		cell wall glycosyl hydrolase YteR, putative (AFU_orthologue; AFUA_2G14630)	protein_coding				FALSE	FALSE	0.989558	-0.254726	0.870693	FALSE	FALSE	Putative unsaturated rhamnogalacturonan hydrolase	0.00263291	-4.53641	9.85153e-05	TRUE	TRUE	878	74.8207	1536	88.2733	638	81.366	714	73.3437	801	56.8352	796	55.6977	553	29.2572	665	37.511	565	23.5469	295	GO:0005575	cellular_component	other
CADANIAG00000645	ANIA_07539	IV	1826282	1826720	-1	1826720	1826282		hydrophobin, putative (AFU_orthologue; AFUA_2G14661)	protein_coding	2.09873e-50	3.74474	2.36477e-53	TRUE	TRUE	0.769444	-1.15827	0.231759	FALSE	FALSE	Putative hydrophobin	0.000988716	-4.86753	2.90832e-05	TRUE	TRUE	28	2.38608	84	4.82745	26	3.31585	49	5.03339	47	3.3349	43	3.00879	28	1.48138	38	2.14349	44	1.83374	1530	GO:0005199; GO:0009277	structural constituent of cell wall; fungal-type cell wall	Development
CADANIAG00008487	ANIA_01837	VII	1976266	1976964	-1	1976964	1976266		hypothetical protein	protein_coding	7.07098e-12	6.15248	1.91215e-13	TRUE	TRUE	0.824563	1.09377	0.338956	FALSE	FALSE	Putative hydrophobin; predicted glycosyl phosphatidylinositol (GPI)-anchor	0.0357089	-5.03573	0.00327187	TRUE	TRUE	2268	193.273	5553	319.129	1919	244.736	1761	180.894	2758	195.695	2325	162.685	1228	64.9689	1868	105.369	2207	91.9786	4249	GO:0005199; GO:0042243; GO:0005622; GO:0009277	structural constituent of cell wall; asexual spore wall assembly; intracellular; fungal-type cell wall	Development	Putative hydrophobin; predicted glycosyl phosphatidylinositol (GPI)-anchor
CADANIAG00001546	ANIA_01088	VIII	1504819	1505972	-1	1505972	1504819		conserved hypothetical protein	protein_coding	1.63829e-10	3.79061	5.61173e-12	TRUE	TRUE	0.772741	-1.31731	0.236487	FALSE	FALSE	protein of unknown function	0.00389875	-5.13456	0.000160819	TRUE	TRUE	2943	250.794	7189	413.149	2554	325.719	2016	207.088	3620	256.858	3586	250.919	1550	82.0047	2550	143.839	2966	123.611	9260	GO:0005575	cellular_component	unknown
CADANIAG00004268	ANIA_08218	II	1177967	1180028	1	1177967	1180028	trxB	thioredoxin reductase, putative (AFU_orthologue; AFUA_5G03540)	protein_coding	9.64505e-09	3.79214	4.66223e-10	TRUE	TRUE	0.757375	-1.53996	0.201883	FALSE	FALSE	Putative thioredoxin reductase	0.00190011	-5.38072	6.44576e-05	TRUE	TRUE	34798	2965.39	67293	3867.3	25409	3240.48	21092	2166.62	47356	3360.16	38116	2667.05	19420	1027.44	30067	1696.01	30970	1290.7	2765	GO:0055114; GO:0036146; GO:0016971	oxidation-reduction process; cellular response to mycotoxin; flavin-linked sulfhydryl oxidase activity	Oxidative stress response
CADANIAG00009279	ANIA_02549	VII	4265905	4267876	-1	4267876	4265905	easD	conserved hypothetical protein	protein_coding	3.72756e-15	4.52215	6.3841e-17	TRUE	TRUE	0.831241	-1.07142	0.351393	FALSE	FALSE	Putative acyl-CoA ligase	0.000566479	-5.59098	1.44285e-05	TRUE	TRUE	65850	5611.56	136400	7838.86	51152	6523.56	37905	3893.69	91580	6498.09	75728	5298.84	37147	1965.31	56090	3163.9	61372	2557.73	5677	GO:0005575	cellular_component	Secondary metabolism
CADANIAG00001906	ANIA_00759	VIII	2500353	2500880	-1	2500880	2500353		DUF614 domain protein (AFU_orthologue; AFUA_1G14190)	protein_coding				FALSE	FALSE	0.732639	-2.23376	0.0234172	FALSE	FALSE	protein of unknown function	0.000191639	-5.66861	3.60687e-06	TRUE	TRUE	1023	87.1772	868	49.8836	591	75.3719	497	51.053	880	62.4407	1120	78.3686	689	36.4524	512	28.8807	691	28.798	2812			unknown
CADANIAG00003177	ANIA_05182	V	1209964	1211463	1	1209964	1211463		Putative Zn(II)2Cys6 transcription factor (Eurofung)	protein_coding	0.00113279	7.60833	0.000279655	TRUE	TRUE	0.836309	1.81531	0.3649	FALSE	FALSE	Fungal Zn(2)-Cys(6) binuclear cluster domain	0.00229602	-5.7931	8.19161e-05	TRUE	TRUE	6467	551.1	14231	817.85	5508	702.451	4405	452.492	7943	563.598	7850	549.28	3692	195.33	5617	316.841	6211	258.849	8848			Transcription factor
CADANIAG00001128	ANIA_09343	VIII	355066	356059	1	355066	356059		conserved hypothetical protein	protein_coding				FALSE	FALSE	1	0.00347213	1	FALSE	FALSE	protein of unknown function	0.023718	-5.79574	0.00182035	TRUE	TRUE	24	2.04521	34	1.95397	20	2.55066	23	2.36261	30	2.12866	37	2.58896	21	1.11103	24	1.35378	25	1.0419	2294	GO:0005575	cellular_component	unknown
CADANIAG00007979	ANIA_08890	VII	541315	542610	-1	542610	541315		cellobiose dehydrogenase, putative (AFU_orthologue; AFUA_8G05805)	protein_coding				FALSE	FALSE	0.806073	-0.869588	0.299791	FALSE	FALSE	Has domain(s) with predicted carbohydrate binding, catalytic activity and role in carbohydrate catabolic process	0.000643097	-6.07367	1.71048e-05	TRUE	TRUE	187	15.9356	300	17.2409	87	11.0954	159	16.3328	229	16.2488	151	10.5658	124	6.56038	133	7.5022	173	7.20992	7593	GO:0005575	cellular_component	unknown
CADANIAG00006259	ANIA_08803	III	2704099	2704979	1	2704099	2704979	rodA	conidial hydrophobin Hyp1/RodA (AFU_orthologue; AFUA_5G09580)	protein_coding	1.33081e-56	6.79528	8.99704e-60	TRUE	TRUE	0.841091	0.729634	0.378209	FALSE	FALSE	Hydrophobin	5.44073e-06	-6.10771	5.21202e-08	TRUE	TRUE	58	4.9426	102	5.8619	25	3.18832	74	7.60145	74	5.2507	54	3.77849	57	3.01566	47	2.65115	60	2.50055	6449	GO:0005199; GO:0042243; GO:0005622; GO:0009277; GO:0031160	structural constituent of cell wall; asexual spore wall assembly; intracellular; fungal-type cell wall; spore wall	Development
CADANIAG00004026	ANIA_08006	II	479581	480387	1	479581	480387	dewA	hypothetical protein: hydrophobin (Eurofung)	protein_coding	4.90242e-41	7.9207	1.04953e-43	TRUE	TRUE	0.751511	1.57602	0.18773	FALSE	FALSE	Hydrophobin	0.00884948	-6.3151	0.000493688	TRUE	TRUE	47	4.00521	84	4.82745	34	4.33612	51	5.23884	79	5.60547	48	3.35865	31	1.64009	47	2.65115	65	2.70893	247	GO:0005199; GO:0042243; GO:0009277; GO:0031160	structural constituent of cell wall; asexual spore wall assembly; fungal-type cell wall; spore wall	Development
CADANIAG00009281	ANIA_10325	VII	4273814	4276118	1	4273814	4276118	srpkD	protein kinase, putative (AFU_orthologue; AFUA_7G00740)	protein_coding				FALSE	FALSE	0.732639	-3.2506	0.0687702	FALSE	FALSE	Has domain(s) with predicted ATP binding, protein kinase activity, protein tyrosine kinase activity, transferase activity, transferring phosphorus-containing groups activity and role in protein phosphorylation	0.0429122	-7.10224	0.00413824	TRUE	TRUE	19	1.61913	42	2.41372	14	1.78546	23	2.36261	56	3.9735	44	3.07877	28	1.48138	35	1.97426	31	1.29195	2695	GO:0005575	cellular_component	other
CADANIAG00002091	ANIA_00585	VIII	3032044	3033774	-1	3033774	3032044	sclB	Putative Zn(II)2Cys6 transcription factor (Eurofung)	protein_coding	1.66596e-49	10.9801	2.06485e-52	TRUE	TRUE	0.970023	-0.10807	0.796214	FALSE	FALSE	Fungal Zn(2)-Cys(6) binuclear cluster domain	1.2181e-34	-11.1088	2.74563e-38	TRUE	TRUE	2971	253.18	6334	364.013	2227	284.016	2053	210.889	2690	190.87	3500	244.902	1564	82.7454	2368	133.573	2550	106.273	10626			Development
[truncated: 1 more columns]
