# Supplementary material for: Velvet domain protein VosA represses the zinc cluster transcription factor SclB regulatory network for Aspergillus nidulans asexual development, oxidative stress response and secondary metabolism
Source: PLoS Genet. 2018 Jul 25;14(7):e1007511. doi: 10.1371/journal.pgen.1007511 (PMC6078315; doi:10.1371/journal.pgen.1007511)
Supplement: S7 Table — The table summarizes all C6 architectures present in A. nidulans according to Wortman and collaborators, updated with two additional proteins found in database searches in AspGD and FungiDB [63,64,73]. Characterized representatives of the individual architectural groups are given and SclB’s architectural group is highlighted in yellow. (XLSX) [file pgen.1007511.s016.xlsx]

## Sheet: Sheet1
C6 motif	Quantity	Metabolic processes	Development	Stress response
CX2CX6CX6CX2CX6C	149	AflR, DbaA, MdpE, ArcA, ClrA, FacB, QutA, UaY	NosA, RosA, SfgA, OefC	PacX
CX2CX6CX5CX2CX6C	73	AmyR, ApdR, GalR, GalX, InuR, PrnA, ScfA, XlnR
CX2CX6CX8CX2CX6C	27	FarA, FarB, TamA
CX2CX6CX5CX2CX8C	19	AcuM, ClrB, SclB	SclB	SclB
CX2CX6CX6CX2CX8C	12	AcuK
CX2CX6CX7CX2CX6C	11
CX2CX6CX9CX2CX6C	11	LeuB
CX2CX6CX10CX2CX6C	4
CX2CX6CX6CX2CX9C	4
CX2CX6CX12CX2CX6C	2
CX2CX6CX6CX2CX5C	2
CX2CX6CX7CX2CX7C	2
CX2CX6CX8CX2CX7C	2	AmdR
CX2CX10CX5CX2CX6C	1
CX2CX10CX6CX2CX6C	1
CX2CX5CX6CX2CX6C	1
CX2CX6CX14CX2CX6C	1		SilA
CX2CX6CX15CX2CX6C	1
CX2CX6CX16CX2CX6C	1	AlcR
CX2CX6CX5CX2CX11C	1
CX2CX6CX5CX2CX5C	1	AraR
CX2CX6CX5CX2CX7C	1
CX2CX6CX6CX1CX6C	1
CX2CX6CX6CX2CX12C	1			SonC
CX2CX6CX6CX2CX7C	1	NirA
CX2CX7CX6CX2CX6C	1
CX2CX9CX12CX2CX6C	1
